# Supplementary material for: A Systematic Analysis of Oncogenic Gene Fusions in Primary Colon Cancer
Source: Oxford University Press journal article supplement (doi:10.1158/0008-5472.can-16-3563), 2017-05-16
Supplement: 00085472can163563-sup-176744_2_unknown_upload_3980184_44d6x4.xlsx [file 00085472can163563-sup-176744_2_unknown_upload_3980184_44d6x4.xlsx]

## Sheet: predicted gene fusions
Supplementary Table S2. Annotated list of predicted gene fusions that passed all filtering steps.
JUNCTION_TYPE	SAMPLE ID tumor	DONOR_CHR	DONOR_START	DONOR_END	DONOR_STRAND	ACCEPTOR_CHR	ACCEPTOR_START	ACCEPTOR_END	ACCEPTOR_STRAND	MULTI_JUNCTION_TYPES	MULTI_READS	UNIQ_JUNCTION_TYPES	UNIQ_READS	DONOR_GENE_ID	DONOR_GENE_NAME	DONOR_GENE_BIOTYPE	DONOR_TRANSCRIPT_ID	DONOR_EXON_ID	DONOR_EXON_NUMBER	DONOR_EXON_TOTAL	DONOR_PHASE	DONOR_BREAK	ACCEPTOR_GENE_ID	ACCEPTOR_GENE_NAME	ACCEPTOR_GENE_BIOTYPE	ACCEPTOR_TRANSCRIPT_ID	ACCEPTOR_EXON_ID	ACCEPTOR_EXON_NUMBER	ACCCEPTOR_EXON_TOTAL	ACCEPTOR_PHASE	ACCEPTOR_BREAK	GENE_FUSION_SAMPLE_COUNT	DONOR_GENE_COUNT	ACCEPTOR_GENE_COUNT	DONOR_DOMAINS	ACCEPTOR_DOMAINS	DONOR_ZSCORE	ACCEPTOR_ZSCORE	DONOR_TUMOR_ZSCORE	ACCEPTOR_TUMOR_ZSCORE	PCR tested	Validated
chim	9319	3	169756775	169797686	+	3	170244671	170244878	-	-1(9)0(0)1(14)2(0)3(0)4(0)5(0)6(0)	23	-1(9)0(0)1(14)2(0)3(0)4(0)5(0)6(0)	23	ENSG00000173890	GPR160	protein_coding	ENST00000355897	ENSE00001215899	3	4	-1	boundary	ENSG00000013293	SLC7A14	protein_coding	ENST00000231706	ENSE00001297017	2	8	-1	boundary	1	22	4		AA-permease_dom:170198956-170244423;	13.5948	5.47882	12.919	15.362	yes	yes
chim	9940	20	48273100	48273192	-	20	45630066	45633669	+	-1(14)0(0)1(15)2(0)	29	-1(13)0(0)1(11)2(0)	24	ENSG00000158470	B4GALT5	protein_coding	ENST00000371711	ENSE00001039084	2	9	1	intron	ENSG00000064655	EYA2	protein_coding	ENST00000327619	ENSE00000662642	3	16	1	boundary	1	30	3		HAD-like_dom:45725725-45812037;	-0.73848	3.44976	-0.637	3.495	yes	T ,N, TC
chim	A2207	3	159976296	160083830	-	3	160037631	160102435	-	-1(1)0(0)1(5)2(0)3(0)4(0)5(0)6(0)	6	-1(1)0(0)1(4)2(0)3(0)4(0)5(0)6(0)	5	ENSG00000248710	TRIM59	protein_coding	ENST00000483754	ENSE00001886203	18	19	-1	exon	ENSG00000068885	IFT80	protein_coding	ENST00000326448	ENSE00003486065	2	20	-1	boundary	29	43	31	WD40_repeat:160073939-160075278;WD40_repeat:160073918-160073817;Znf_C3HC4_RING-type:160156945-160156796;Znf_B-box:160156690-160156574;	WD40_repeat:160093669-160095219;WD40_repeat:160073939-160075278;WD40_repeat:160073918-160073817;	-0.325189	0.160952	-0.334	-0.083	yes	T, no N available
chim	A845	20	20656879	20656879	-	20	25443178	25459843	-	-1(0)0(0)1(13)2(0)	13	-1(0)0(0)1(6)2(0)	6	ENSG00000188559	RALGAPA2	protein_coding	ENST00000202677	ENSE00001611596	3	40	0	boundary	ENSG00000101004	NINL	protein_coding	ENST00000278886	ENSE00001358765	16	24	0	boundary	1	129	12			-0.206803	0.314872	-0.407	0.292	yes	No
chim	A2111	17	65191534	65197277	-	20	32026826	32026834	-	-1(3)0(0)1(2)2(0)3(0)4(0)5(0)6(0)	5	-1(3)0(0)1(2)2(0)3(0)4(0)5(0)6(0)	5	ENSG00000198265	HELZ	protein_coding	ENST00000358691	ENSE00000947857	8	33	1	boundary	ENSG00000101400	SNTA1	protein_coding	ENST00000217381	ENSE00000661329	2	8	1	intron	1	21	1			0.0998168	3.24969	-0.079	6.814	yes	T,N
chim	A826	9	73532096	73532106	-	20	33222451	33231974	-	-1(8)0(0)1(0)2(0)	8	-1(6)0(0)1(0)2(0)	6	ENSG00000083067	TRPM3	protein_coding	ENST00000377110	ENSE00001472841	1	25	0	intron	ENSG00000101464	PIGU	protein_coding	ENST00000217446	ENSE00000860130	4	12	0	exon	5	9	17		PIG-U:33148784-33176258;	-0.260707	0.931823	-0.257	0.762	yes	No
chim	A499	12	95044128	95044128	-	12	93285498	93285498	-	-1(0)0(0)1(6)2(0)	6	-1(0)0(0)1(6)2(0)	6	ENSG00000057704	TMCC3	protein_coding	ENST00000261226	ENSE00001308856	1	4	0	boundary	ENSG00000102189	EEA1	protein_coding	ENST00000322349	ENSE00003502372	2	29	0	boundary	1	4	22		Znf_FYVE:93169910-93170621;	-0.52246	0.268387	-0.555	0.091	yes	TC
chim	A1274	14	36039768	36194229	-	9	108284317	108286840	+	-1(4)0(1)1(1)2(0)	6	-1(4)0(1)1(1)2(0)	6	ENSG00000174373	RALGAPA1	protein_coding	ENST00000307138	ENSE00003525880	38	40	2	intron	ENSG00000106701	FSD1L	protein_coding	ENST00000374710	ENSE00000983371	10	13	2	intron	29	79	33		SPRY_rcpt:108297366-108308654;	0.643727	-0.369932	0.472	-0.566	yes	No
chim	A1585	9	4985126	4986025	+	9	271626	286541	+	-1(9)0(0)1(23)2(0)3(0)4(0)5(0)6(0)	32	-1(9)0(0)1(12)2(0)3(0)4(0)5(0)6(0)	21	ENSG00000096968	JAK2	protein_coding	ENST00000381652	ENSE00001489459	2	25	-1	intron	ENSG00000107099	DOCK8	protein_coding	ENST00000432829	ENSE00003489863	2	48	-1	boundary	1	27	17		DOCK_C:446434-463623;DOCK_C/D_N:286510-304669;	3.03035	1.79091	2.734	1.799	yes	No
chim	A2086	9	135796749	135797214	-	9	134497382	134514179	-	-1(7)0(0)1(21)2(0)3(0)4(0)5(0)6(0)	28	-1(7)0(0)1(16)2(0)3(0)4(0)5(0)6(0)	23	ENSG00000165699	TSC1	protein_coding	ENST00000298552	ENSE00003579149	8	23	2	boundary	ENSG00000107263	RAPGEF1	protein_coding	ENST00000372190	ENSE00003531518	5	24	2	boundary	1	9	27		RasGRF_CDC25:134455779-134463330;Ras-like_Gua-exchang_fac_N:134464374-134471686;	-1.2735	-0.63034	-1.411	-0.476	yes	yes
chim	A2219	17	30955186	30981535	-	17	35372404	35378284	+	-1(7)0(0)1(8)2(0)3(0)4(0)5(0)6(0)	15	-1(7)0(0)1(6)2(0)3(0)4(0)5(0)6(0)	13	ENSG00000176658	MYO1D	protein_coding	ENST00000318217	ENSE00003465892	20	22	0	intron	ENSG00000108270	AATF	protein_coding	ENST00000225402	ENSE00000887734	9	12	0	intron	2	3390	10	Myosin_head_motor_dom:31039214-31203797;IQ_motif_EF-hand-BS:30986357-31039007;		-0.534135	1.6515	-0.525	1.457	yes	No
chim	9336	20	35563430	35563430	-	4	49061650	49061650	+	-1(0)0(5)1(0)2(0)	5	-1(0)0(5)1(0)2(0)	5	ENSG00000101347	SAMHD1	protein_coding	ENST00000262878	ENSE00003546823	4	16	2	intron	ENSG00000109182	CWH43	protein_coding	ENST00000226432	ENSE00001209849	16	16	2	intron	12	35	12	SAM_2:35569515-35579840;SAM_type1:35569515-35579840;		-0.280551	-0.534504	-0.225	-0.547	yes	No
chim	A837	20	30228082	30228082	+	12	118467573	118467573	+	-1(0)0(7)1(0)2(0)	7	-1(0)0(5)1(0)2(0)	5	ENSG00000131055	COX4I2	protein_coding	ENST00000376075	ENSE00003503773	3	5	1	intron	ENSG00000111445	RFC5	protein_coding	ENST00000392542	ENSE00003512778	11	12	1	intron	12	12	14			0.382025	0.588059	0.592	0.422	yes	No
chim	A835	6	136732757	136742838	-	6	125541223	125541343	+	-1(7)0(0)1(12)2(0)	19	-1(7)0(0)1(10)2(0)	17	ENSG00000135525	MAP7	protein_coding	ENST00000354570	ENSE00003660789	3	18	1	boundary	ENSG00000111907	TPD52L1	protein_coding	ENST00000534000	ENSE00003687765	2	7	1	boundary	1	57	3			-1.14819	0.70646	-1.456	0.712	yes	T,TC
chim	A1576	2	9768946	9770475	-	2	10729748	10740108	-	-1(9)0(0)1(14)2(0)3(0)4(0)5(0)6(0)	23	-1(9)0(0)1(8)2(0)3(0)4(0)5(0)6(0)	17	ENSG00000134308	YWHAQ	protein_coding	ENST00000381844	ENSE00001550491	1	5	0	intron	ENSG00000115761	NOL10	protein_coding	ENST00000345985	ENSE00001070647	17	20	0	intron	1	35	26		NUC153:10729857-10729777;	1.50293	1.90827	1.539	1.815	yes	No
chim	A485	6	26204893	26204894	+	6	26027448	26027449	-	-1(0)0(79)1(0)2(0)	79	-1(0)0(5)1(0)2(0)	5	ENSG00000198518	HIST1H4E	protein_coding	ENST00000360441	ENSE00001418404	1	1	0	exon	ENSG00000124529	HIST1H4B	protein_coding	ENST00000377364	ENSE00001962607	1	1	0	exon	1	26	9		Histone_core_D:26027400-26027200;TAF_TATA-bd:26027295-26027206;	0.768343	0.95986	0.573	0.771	yes	N, TC
chim	A828	19	38397933	38532283	+	19	46355796	46364335	-	-1(22)0(0)1(35)2(0)3(0)4(0)5(0)6(0)	57	-1(21)0(0)1(24)2(0)3(0)4(0)5(0)6(0)	45	ENSG00000105738	SIPA1L3	protein_coding	ENST00000222345	ENSE00001262158	2	22	-1	intron	ENSG00000125755	SYMPK	protein_coding	ENST00000245934	ENSE00003591991	2	27	-1	intron	1	28	8		DUF3453:46345748-46352009;Symplekin_C:46320233-46326631;	-0.380998	2.35765	-0.371	2.195	yes	N
chim	A706	20	16553873	16553873	-	20	17410079	17410079	+	-1(0)0(0)1(5)2(0)	5	-1(0)0(0)1(5)2(0)	5	ENSG00000089177	KIF16B	protein_coding	ENST00000354981	ENSE00003537504	1	26	2	boundary	ENSG00000125851	PCSK2	protein_coding	ENST00000262545	ENSE00000859197	7	12	2	boundary	1	56	3		PrprotnconvertsP:17462309-17462572;	-0.0601624	0.046523	-0.12	6.404	yes	yes
chim	A803	7	157049717	157049740	+	7	158694429	158694508	+	-1(3)0(0)1(3)2(0)	6	-1(3)0(0)1(3)2(0)	6	ENSG00000009335	UBE3C	protein_coding	ENST00000348165	ENSE00003486062	22	23	0	intron	ENSG00000126870	WDR60	protein_coding	ENST00000407559	ENSE00003458308	9	25	0	boundary	1	99	2		WD40_repeat:158727194-158734646;	-0.492693	0.136808	-0.707	0.054	yes	yes
chim	A839	2	189869091	189869091	+	9	99003731	99003731	-	-1(0)0(0)1(11)2(0)	11	-1(0)0(0)1(6)2(0)	6	ENSG00000168542	COL3A1	protein_coding	ENST00000304636	ENSE00001129983	40	51	0	boundary	ENSG00000130948	HSD17B3	protein_coding	ENST00000375263	ENSE00003604146	10	11	0	intron	11	2227	11	Collagen:189849945-189850475;Collagen:189859523-189860505;Collagen:189860509-189861906;Collagen:189862445-189864050;VWF_C:189849501-189849671;		4.93168	-0.362084	4.567	-0.345	yes	No
chim	A481	21	30432882	30437287	-	1	146675144	146675750	-	-1(16)0(2)1(0)2(0)	18	-1(13)0(2)1(0)2(0)	15	ENSG00000156261	CCT8	protein_coding	ENST00000286788	ENSE00003525940	14	15	2	exon	ENSG00000131781	FMO5	protein_coding	ENST00000254090	ENSE00000903083	7	9	2	intron	14	57	24			1.94578	-0.485276	1.769	-0.372	yes	No
chim	9362	19	3977211	3977211	-	1	45808201	45808201	+	-1(0)0(5)1(0)2(0)	5	-1(0)0(5)1(0)2(0)	5	ENSG00000167658	EEF2	protein_coding	ENST00000309311	ENSE00001115368	14	15	1	intron	ENSG00000132773	TOE1	protein_coding	ENST00000372090	ENSE00003685409	6	8	1	exon	22	1874	23	EF_GTP-bd_dom:3982051-3984135;Transl_elong_EFG/EF2_IV:3977609-3977818;Transl_elong_EFTu/EF1A_2:3980065-3980513;	Znf_CCCH:45808652-45808802;	0.359511	-0.566364	0.293	-0.53	yes	No
chim	9326	17	48465421	48465421	-	1	62734111	62734111	-	-1(0)0(7)1(0)2(0)	7	-1(0)0(5)1(0)2(0)	5	ENSG00000108829	LRRC59	protein_coding	ENST00000225972	ENSE00000737040	5	7	1	exon	ENSG00000132854	KANK4	protein_coding	ENST00000371153	ENSE00001801128	5	10	1	exon	1	62	1	Leu-rich_rpt:48470259-48472291;Leu-rich_rpt:48470238-48470173;Leu-rich_rpt:48470169-48470104;	Ankyrin_rpt:62718882-62728765;Ankyrin_rpt:62713342-62713250;Ankyrin_rpt:62713246-62713160;	-0.0801096	-0.347166	-0.146	-0.298	yes	No
chim	9335	6	10757051	10880782	+	6	10756834	10880716	+	-1(2)0(4)1(0)2(0)3(0)4(0)5(0)6(0)	6	-1(2)0(4)1(0)2(0)3(0)4(0)5(0)6(0)	6	ENSG00000153157	SYCP2L	protein_coding	ENST00000283141	ENSE00001538615	1	30	-1	intron	ENSG00000137210	TMEM14B	protein_coding	ENST00000379542	ENSE00001833677	6	6	-1	exon	12	21	33			1.02093	-0.512008	1.075	-0.553	yes	No
chim	A837	6	25285063	25285138	+	6	53673375	53707029	+	-1(3)0(0)1(6)2(0)	9	-1(3)0(0)1(5)2(0)	8	ENSG00000079691	LRRC16A	protein_coding	ENST00000329474	ENSE00003634562	2	37	0	boundary	ENSG00000137269	LRRC1	protein_coding	ENST00000370888	ENSE00002174135	2	14	0	intron	1	60	23		Leu-rich_rpt:53706927-53706989;Leu-rich_rpt:53706996-53743823;Leu-rich_rpt:53743833-53747710;Leu-rich_rpt:53761647-53762104;Leu-rich_rpt:53762108-53764560;	-0.741012	0.0337162	-1.013	0.313	yes	TC
chim	A839	2	189927589	189927589	-	15	71223389	71223389	+	-1(0)0(5)1(0)2(0)	5	-1(0)0(5)1(0)2(0)	5	ENSG00000204262	COL5A2	protein_coding	ENST00000374866	ENSE00003512494	29	54	0	intron	ENSG00000137821	LRRC49	protein_coding	ENST00000260382	ENSE00003491496	8	16	0	intron	15	215	24	Collagen:189957147-189963454;Collagen:189948764-189953422;Collagen:189944758-189949887;VWF_C:189975153-189974986;		4.45276	-0.568757	4.14	-0.624	yes	No
chim	A2207	14	81672771	81682767	-	14	81728276	81736286	-	-1(4)0(1)1(19)2(0)3(0)4(0)5(0)6(0)	24	-1(4)0(1)1(13)2(0)3(0)4(0)5(0)6(0)	18	ENSG00000165417	GTF2A1	protein_coding	ENST00000553612	ENSE00003582484	2	9	0	intron	ENSG00000140022	STON2	protein_coding	ENST00000555447	ENSE00002439474	8	8	0	intron	1	17	2			1.63812	3.43754	1.459	3.182	yes	No
chim	9377	2	42472781	42477334	+	15	88576087	88641739	-	-1(2)0(2)1(13)2(0)	17	-1(2)0(2)1(10)2(0)	14	ENSG00000143924	EML4	protein_coding	ENST00000318522	ENSE00003642723	2	23	1	intron	ENSG00000140538	NTRK3	protein_coding	ENST00000394480	ENSE00003656026	14	19	1	intron	1	93	3		Ser-Thr/Tyr_kinase_cat_dom:88420352-88483855;Prot_kinase_cat_dom:88420352-88483855;	0.557742	17.5124	0.362	17.959	yes	yes
chim	A814	17	34854109	34854918	-	17	37903003	37903003	+	-1(0)0(0)1(8)2(0)	8	-1(0)0(0)1(8)2(0)	8	ENSG00000141140	MYO19	protein_coding	ENST00000431794	ENSE00003483516	25	26	0	boundary	ENSG00000141738	GRB7	protein_coding	ENST00000309156	ENSE00001938225	15	15	0	boundary	1	14	1	Myosin_head_motor_dom:34859041-34883896;		1.44651	0.384828	1.307	0.204	yes	yes
chim	A2080	7	16844558	16844558	-	2	175263002	175264649	+	-1(0)0(0)1(5)2(0)3(0)4(0)5(0)6(0)	5	-1(0)0(0)1(5)2(0)3(0)4(0)5(0)6(0)	5	ENSG00000106541	AGR2	protein_coding	ENST00000419304	ENSE00001710355	1	8	-1	boundary	ENSG00000144306	SCRN3	protein_coding	ENST00000272732	ENSE00001016386	2	8	-1	boundary	1	1017	1		Peptidase_C69:175264732-175287618;	0.303353	2.29576	0.24	2.478	yes	No
chim	A1591	3	100432585	100438904	+	3	100348437	100348464	+	-1(11)0(0)1(19)2(0)3(0)4(0)5(0)6(0)	30	-1(10)0(0)1(12)2(0)3(0)4(0)5(0)6(0)	22	ENSG00000114354	TFG	protein_coding	ENST00000240851	ENSE00000967216	3	8	1	intron	ENSG00000144820	GPR128	protein_coding	ENST00000273352	ENSE00000967307	2	16	1	intron	2	35	4		GPCR_2_secretin-like:100368570-100413600;GPS_dom:100365441-100365569;	0.962118	2.62147	0.908	2.722	yes	T,N
chim	A2121	3	100432583	100438904	+	3	100348437	100348488	+	-1(12)0(0)1(29)2(0)3(0)4(0)5(0)6(0)	41	-1(12)0(0)1(18)2(0)3(0)4(0)5(0)6(0)	30	ENSG00000114354	TFG	protein_coding	ENST00000240851	ENSE00000967216	3	8	1	intron	ENSG00000144820	GPR128	protein_coding	ENST00000273352	ENSE00000967307	2	16	1	intron	2	35	4		GPCR_2_secretin-like:100368570-100413600;GPS_dom:100365441-100365569;	1.17573	3.44416	1.114	3.566	yes	T,N
chim	A477	5	160037705	160037756	-	5	115576692	115576789	+	-1(1)0(7)1(0)2(0)	8	-1(1)0(7)1(0)2(0)	8	ENSG00000118322	ATP10B	protein_coding	ENST00000327245	ENSE00000768805	18	26	0	intron	ENSG00000145781	COMMD10	protein_coding	ENST00000274458	ENSE00003537569	6	7	0	intron	1	97	23	ATPase_P-typ_transduc_dom_A:160061614-160113087;HAD-like_dom:160039933-160042846;		-0.414143	-1.16085	-0.518	-1.214	yes	yes
chim	A1448	8	87526770	87527728	+	8	87062431	87086401	-	-1(3)0(0)1(8)2(0)	11	-1(3)0(0)1(6)2(0)	9	ENSG00000085719	CPNE3	protein_coding	ENST00000521271	ENSE00002099300	2	17	-1	boundary	ENSG00000147613	PSKH2	protein_coding	ENST00000276616	ENSE00000980872	1	3	-1	intron	1	55	1		Prot_kinase_cat_dom:87060997-87076195;Ser-Thr/Tyr_kinase_cat_dom:87076851-87076213;	-0.842364	19.6874	-0.982	17.829	yes	yes
chim	A499	9	124854965	124854965	-	9	115593004	115593004	+	-1(0)0(0)1(8)2(0)	8	-1(0)0(0)1(8)2(0)	8	ENSG00000175764	TTLL11	protein_coding	ENST00000321582	ENSE00002268412	1	9	0	boundary	ENSG00000148158	SNX30	protein_coding	ENST00000374232	ENSE00001646372	4	9	0	boundary	1	5	16		Vps5_C:115598600-115626587;BAR_dom:115600847-115631091;	-0.321046	1.50867	-0.095	1.402	yes	yes
chim	9239	18	43664465	43664510	-	11	77618761	77618857	-	-1(13)0(0)1(17)2(0)	30	-1(12)0(0)1(15)2(0)	27	ENSG00000152234	ATP5A1	protein_coding	ENST00000593152	ENSE00003666949	11	12	2	intron	ENSG00000149262	INTS4	protein_coding	ENST00000534064	ENSE00003561017	16	23	2	boundary	1	144	21	ATPase_F1/V1/A1_a/bsu_nucl-bd:43666461-43669533;ATPase_F1/V1/A1-cplx_a/bsu_C:43664621-43666354;ATPase_a/bsu_N:43669963-43671649;		-0.572743	4.7026	-0.383	4.549	yes	T,N
chim	A1272	8	28225321	28260158	-	16	29972972	29974835	+	-1(11)0(2)1(21)2(0)3(0)4(0)5(0)6(0)	34	-1(10)0(2)1(20)2(0)3(0)4(0)5(0)6(0)	32	ENSG00000186918	ZNF395	protein_coding	ENST00000344423	ENSE00001420932	1	10	-1	intron	ENSG00000149932	TMEM219	protein_coding	ENST00000566848	ENSE00002595781	1	5	-1	intron	1	17	8			-0.678602	1.90185	-0.559	2.013	yes	No
chim	A534	13	46935541	46937249	-	13	41134901	41185697	-	-1(2)0(2)1(2)2(0)	6	-1(2)0(2)1(2)2(0)	6	ENSG00000102445	KIAA0226L	protein_coding	ENST00000429979	ENSE00003666032	8	15	0	intron	ENSG00000150907	FOXO1	protein_coding	ENST00000379561	ENSE00001094288	2	3	0	intron	1	78	20			0.237972	0.284993	0.08	0.553	yes	T, no N available
chim	9253	9	2161861	2170473	+	11	44135734	44135858	+	-1(5)0(0)1(7)2(0)	12	-1(5)0(0)1(7)2(0)	12	ENSG00000080503	SMARCA2	protein_coding	ENST00000382203	ENSE00000682837	29	34	2	boundary	ENSG00000151348	EXT2	protein_coding	ENST00000395673	ENSE00003519127	4	14	2	boundary	1	38	29	SNF2_N:2077772-2097454;BRK_domain:2073228-2073588;HSA:2056805-2060819;Helicase_C:2104143-2115858;Gln-Leu-Gln_QLQ:2039625-2039732;	HexNAc_Trfase_a:44219440-44265784;	2.19291	-2.08553	2.288	-1.968	yes	No
chim	A485	5	126113517	126113560	+	5	78752680	78752842	-	-1(1)0(0)1(6)2(0)	7	-1(1)0(0)1(6)2(0)	7	ENSG00000113368	LMNB1	protein_coding	ENST00000261366	ENSE00001294154	1	11	2	boundary	ENSG00000152413	HOMER1	protein_coding	ENST00000334082	ENSE00001386390	2	9	2	boundary	1	19	4		EVH1:78742969-78752686;	0.140293	0.962286	-0.048	0.774	yes	yes
chim	9319	13	28752073	28830677	+	13	27669933	27690734	-	-1(2)0(0)1(6)2(0)3(0)4(0)5(0)6(0)	8	-1(2)0(0)1(6)2(0)3(0)4(0)5(0)6(0)	8	ENSG00000152520	PAN3	protein_coding	ENST00000380958	ENSE00003655221	7	19	0	boundary	ENSG00000152484	USP12	protein_coding	ENST00000282344	ENSE00001005468	2	9	0	boundary	1	110	18		Peptidase_C19:27643522-27690654;	5.46878	9.64991	5.111	9.223	yes	No
chim	9259	1	93297676	93299218	+	2	111725485	111725599	+	-1(39)0(0)1(2)2(0)	41	-1(4)0(0)1(2)2(0)	6	ENSG00000122406	RPL5	protein_coding	ENST00000370321	ENSE00003466739	3	8	0	boundary	ENSG00000153093	ACOXL	protein_coding	ENST00000439055	ENSE00001008795	13	18	0	intron	12	180	12			-0.412097	-0.526769	-0.397	-0.539	yes	No
chim	9362	1	93297676	93299218	+	2	111725485	111725599	+	-1(72)0(0)1(1)2(0)	73	-1(4)0(0)1(1)2(0)	5	ENSG00000122406	RPL5	protein_coding	ENST00000370321	ENSE00003466739	3	8	0	boundary	ENSG00000153093	ACOXL	protein_coding	ENST00000439055	ENSE00001008795	13	18	0	intron	12	180	12			0.131724	-0.209561	0.112	-0.241	yes	No
chim	A1838	6	131384281	131384297	-	6	168467775	168479705	-	-1(4)0(0)1(2)2(0)3(0)4(0)5(0)6(0)	6	-1(4)0(0)1(2)2(0)3(0)4(0)5(0)6(0)	6	ENSG00000079819	EPB41L2	protein_coding	ENST00000337057	ENSE00001735669	1	20	-1	intron	ENSG00000153303	FRMD1	protein_coding	ENST00000283309	ENSE00001355851	1	11	-1	exon	1	94	3		FERM_central:168464437-168467436;FERM_N:168467512-168479563;	-0.134582	2.21982	-0.214	3.005	yes	yes
chim	A849	3	196921294	196921299	-	7	140482885	140487385	-	-1(3)0(0)1(5)2(0)	8	-1(3)0(0)1(5)2(0)	8	ENSG00000075711	DLG1	protein_coding	ENST00000346964	ENSE00003572262	5	26	0	intron	ENSG00000157764	BRAF	protein_coding	ENST00000288602	ENSE00003680515	9	18	0	boundary	1	75	20	L27_1:197009717-197024058;	Ser-Thr/Tyr_kinase_cat_dom:140434571-140481377;Prot_kinase_cat_dom:140434571-140481377;	-0.670021	2.70377	-0.735	2.525	yes	yes
chim	9370	7	138189127	138201223	+	7	140482875	140485776	-	-1(3)0(0)1(6)2(0)	9	-1(3)0(0)1(5)2(0)	8	ENSG00000122779	TRIM24	protein_coding	ENST00000343526	ENSE00003638626	3	19	1	intron	ENSG00000157764	BRAF	protein_coding	ENST00000288602	ENSE00003685923	10	18	1	intron	1	11	20	Znf_B-box:138189146-138200083;	Ser-Thr/Tyr_kinase_cat_dom:140434571-140481377;Prot_kinase_cat_dom:140434571-140481377;	-0.845172	0.922169	-1.082	0.744	yes	yes
chim	9326	7	150817199	150817234	+	7	140482876	140487385	-	-1(3)0(0)1(2)2(0)	5	-1(3)0(0)1(2)2(0)	5	ENSG00000133612	AGAP3	protein_coding	ENST00000397238	ENSE00003475631	8	18	0	intron	ENSG00000157764	BRAF	protein_coding	ENST00000288602	ENSE00003680515	9	18	0	boundary	1	2	20	MIRO-like:150813934-150815299;Small_GTPase:150813934-150815606;	Ser-Thr/Tyr_kinase_cat_dom:140434571-140481377;Prot_kinase_cat_dom:140434571-140481377;	-0.751245	3.3045	-0.799	3.128	yes	yes
chim	9319	3	169880842	169896560	-	3	170611128	170612213	-	-1(5)0(0)1(7)2(0)3(0)4(0)5(0)6(0)	12	-1(5)0(0)1(5)2(0)3(0)4(0)5(0)6(0)	10	ENSG00000173889	PHC3	protein_coding	ENST00000495893	ENSE00003669159	4	15	0	intron	ENSG00000163577	EIF5A2	protein_coding	ENST00000295822	ENSE00003560568	4	5	0	boundary	1	25	4			10.0937	0.160738	9.297	0.122	yes	yes
chim	A2199	20	17611479	17616221	-	10	43611052	43613834	+	-1(38)0(0)1(37)2(0)3(0)4(0)5(0)6(0)	75	-1(35)0(0)1(25)2(0)3(0)4(0)5(0)6(0)	60	ENSG00000125844	RRBP1	protein_coding	ENST00000377807	ENSE00003573046	9	26	0	intron	ENSG00000165731	RET	protein_coding	ENST00000355710	ENSE00001095944	12	20	0	intron	1	276	1	Rib_rcpt_KP:17641057-17640641;	Ser-Thr/Tyr_kinase_cat_dom:43612069-43620407;Prot_kinase_cat_dom:43612072-43620401;	0.0315009	10.8455	-0.001	14.208	yes	yes
chim	A501	15	78484760	78485880	-	15	78449437	78449974	+	-1(1)0(3)1(1)2(0)	5	-1(1)0(3)1(1)2(0)	5	ENSG00000103740	ACSBG1	protein_coding	ENST00000258873	ENSE00003567779	5	14	0	intron	ENSG00000166411	IDH3A	protein_coding	ENST00000299518	ENSE00003471134	3	11	0	intron	1	2	7		IsoPropMal-DH-like_dom:78449897-78461321;	-0.544601	-0.674505	-0.33	-0.541	yes	yes
chim	A1260	22	41911415	41916281	+	12	94192420	94287825	+	-1(19)0(0)1(20)2(0)3(0)4(0)5(0)6(0)	39	-1(19)0(0)1(15)2(0)3(0)4(0)5(0)6(0)	34	ENSG00000100412	ACO2	protein_coding	ENST00000216254	ENSE00003509924	9	18	1	boundary	ENSG00000169372	CRADD	protein_coding	ENST00000542893	ENSE00003583423	3	3	1	intron	1	13	17		Death_domain:94243806-94244012;	0.383853	4.70179	0.999	5.461	yes	T,N
chim	9281	3	170609218	170626337	-	3	169804890	169814057	-	-1(3)0(0)1(13)2(0)	16	-1(3)0(0)1(12)2(0)	15	ENSG00000163577	EIF5A2	protein_coding	ENST00000295822	ENSE00001313855	5	5	-1	exon	ENSG00000173889	PHC3	protein_coding	ENST00000495893	ENSE00001824278	15	15	-1	intron	1	5	28	Transl_elong_IF5A_C:170611209-170624779;KOW:170624883-170625432;		20.3527	15.4379	18.5	14.26	yes	No
chim	A2086	20	30137925	30137925	+	20	30037794	30037831	+	-1(0)0(0)1(5)2(0)3(0)4(0)5(0)6(0)	5	-1(0)0(0)1(5)2(0)3(0)4(0)5(0)6(0)	5	ENSG00000101294	HM13	protein_coding	ENST00000335574	ENSE00003689466	7	13	1	boundary	ENSG00000180424	DEFB123	protein_coding	ENST00000376309	ENSE00001470131	2	2	1	intron	1	25	4			0.500342	9.45782	0.356	8.619	yes	T ,N, TC
chim	9244	2	10267348	10267348	+	X	44168927	44168927	-	-1(0)0(0)1(8)2(0)	8	-1(0)0(0)1(6)2(0)	6	ENSG00000171848	RRM2	protein_coding	ENST00000360566	ENSE00003490848	7	10	0	boundary	ENSG00000183690	EFHC2	protein_coding	ENST00000333807	ENSE00001751206	3	15	0	intron	12	47	12			0.305652	-0.638476	0.086	-0.585	yes	No
chim	9248	2	10267348	10267348	+	X	44168927	44168927	-	-1(0)0(0)1(9)2(0)	9	-1(0)0(0)1(6)2(0)	6	ENSG00000171848	RRM2	protein_coding	ENST00000360566	ENSE00003490848	7	10	0	boundary	ENSG00000183690	EFHC2	protein_coding	ENST00000333807	ENSE00001751206	3	15	0	intron	12	47	12			0.674325	-0.409381	0.474	-0.226	yes	No
chim	A1141	2	10267348	10267348	+	X	44168927	44168927	-	-1(0)0(0)1(12)2(0)	12	-1(0)0(0)1(7)2(0)	7	ENSG00000171848	RRM2	protein_coding	ENST00000360566	ENSE00003490848	7	10	0	boundary	ENSG00000183690	EFHC2	protein_coding	ENST00000333807	ENSE00001751206	3	15	0	intron	12	47	12			0.256797	-0.285818	0.035	-0.01	No
chim	A469	2	10267348	10267348	+	X	44168927	44168927	-	-1(0)0(0)1(8)2(0)	8	-1(0)0(0)1(6)2(0)	6	ENSG00000171848	RRM2	protein_coding	ENST00000360566	ENSE00003490848	7	10	0	boundary	ENSG00000183690	EFHC2	protein_coding	ENST00000333807	ENSE00001751206	3	15	0	intron	12	47	12			-0.254921	-0.227654	-0.503	0.062	yes	No
chim	A531	2	10267348	10267349	+	X	44168927	44169056	-	-1(2)0(0)1(6)2(0)	8	-1(2)0(0)1(4)2(0)	6	ENSG00000171848	RRM2	protein_coding	ENST00000360566	ENSE00003490848	7	10	0	intron	ENSG00000183690	EFHC2	protein_coding	ENST00000333807	ENSE00001751206	3	15	0	intron	12	47	12			0.81724	-0.319435	0.623	-0.082	yes	No
chim	A703	2	10267348	10267348	+	X	44168927	44168927	-	-1(0)0(0)1(6)2(0)	6	-1(0)0(0)1(5)2(0)	5	ENSG00000171848	RRM2	protein_coding	ENST00000360566	ENSE00003490848	7	10	0	boundary	ENSG00000183690	EFHC2	protein_coding	ENST00000333807	ENSE00001751206	3	15	0	intron	12	47	12			-1.00873	-0.250573	-1.294	0.062	yes	No
chim	A828	13	50358983	50366606	-	13	67205416	67689435	-	-1(5)0(2)1(4)2(0)3(0)4(0)5(0)6(0)	11	-1(5)0(2)1(4)2(0)3(0)4(0)5(0)6(0)	11	ENSG00000102753	KPNA3	protein_coding	ENST00000261667	ENSE00001307048	1	17	0	intron	ENSG00000184226	PCDH9	protein_coding	ENST00000544246	ENSE00001402879	3	5	0	intron	1	23	6			-1.32083	0.2191	-1.318	0.815	yes	N
chim	9381	4	146734130	146734130	-	12	95388035	95388035	-	-1(0)0(8)1(0)2(0)	8	-1(0)0(6)1(0)2(0)	6	ENSG00000151612	ZNF827	protein_coding	ENST00000379448	ENSE00003643692	8	15	1	intron	ENSG00000184752	NDUFA12	protein_coding	ENST00000327772	ENSE00003500017	3	4	1	intron	1	8	5			0.212574	0.570584	0.289	0.609	yes	No
chim	A1266	X	40945266	40945363	+	X	48687490	48687721	+	-1(3)0(0)1(10)2(0)	13	-1(3)0(0)1(9)2(0)	12	ENSG00000124486	USP9X	protein_coding	ENST00000324545	ENSE00001477167	1	45	-1	boundary	ENSG00000187682	ERAS	protein_coding	ENST00000338270	ENSE00001375106	1	1	-1	exon	1	181	2		Small_GTPase:48687661-48688134;MIRO-like:48687661-48687996;Small_GTPase_ARF/SAR:48687655-48688131;	0.710659	20.4915	0.529	18.594	yes	yes
chim	A1268	22	41348982	41368556	+	22	41348174	41349588	+	-1(1)0(2)1(2)2(0)3(0)4(0)5(0)6(0)	5	-1(1)0(2)1(2)2(0)3(0)4(0)5(0)6(0)	5	ENSG00000100387	RBX1	protein_coding	ENST00000216225	ENSE00001814441	5	5	-1	exon	ENSG00000196236	XPNPEP3	protein_coding	ENST00000357137	ENSE00001430265	10	10	-1	intron	4	4	15			-0.137743	1.44515	-0.304	1.339	yes	No
chim	A574	8	30492548	30492600	-	8	38994175	39004725	+	-1(1)0(0)1(4)2(0)	5	-1(1)0(0)1(4)2(0)	5	ENSG00000197265	GTF2E2	protein_coding	ENST00000355904	ENSE00003526605	3	8	0	boundary	ENSG00000197140	ADAM32	protein_coding	ENST00000379907	ENSE00003605948	3	25	0	boundary	1	7	15		Peptidase_M12B:39018450-39068760;ADAM_Cys-rich:39080668-39091569;Blood-coag_inhib_Disintegrin:39068809-39080658;	-0.792428	1.8786	-0.879	1.667	yes	yes
chim	9372	14	50269385	50298768	-	14	50301168	50301171	-	-1(2)0(0)1(5)2(0)3(0)4(0)5(0)6(0)	7	-1(2)0(0)1(5)2(0)3(0)4(0)5(0)6(0)	7	ENSG00000165525	NEMF	protein_coding	ENST00000298310	ENSE00003684879	21	33	0	intron	ENSG00000197502	AL627171.1	protein_coding	ENST00000358799	ENSE00001404017	2	2	0	intron	31	57	31	Fibro-bd_N:50292674-50319414;DUF814:50270013-50281473;		1.34524	-0.071695	1.163	-0.211	yes	No
chim	A2121	1	207102037	207110936	-	3	58619727	58646427	-	-1(5)0(1)1(0)2(0)3(0)4(0)5(0)6(0)	6	-1(5)0(1)1(0)2(0)3(0)4(0)5(0)6(0)	6	ENSG00000162896	PIGR	protein_coding	ENST00000356495	ENSE00001418275	11	11	-1	exon	ENSG00000198643	FAM3D	protein_coding	ENST00000358781	ENSE00001398795	2	10	-1	intron	2	6806	32	Ig_V-set:207112792-207112511;Ig_V-set:207111077-207110799;Ig_V-set:207110735-207110490;Ig_V-set:207109147-207108881;Ig_V-set:207108072-207107809;		2.87976	1.64787	2.914	2.184	yes	No
chim	A507	1	6692556	6692556	+	1	23713913	23713913	-	-1(0)0(0)1(8)2(0)	8	-1(0)0(0)1(6)2(0)	6	ENSG00000041988	THAP3	protein_coding	ENST00000377627	ENSE00000416758	4	5	0	boundary	ENSG00000204219	TCEA3	protein_coding	ENST00000450454	ENSE00003559521	9	11	0	boundary	1	4	8	Znf_C2CH:6685286-6688743;	Znf_TFIIS:23710911-23713767;	-0.486209	-0.730037	-0.285	-0.589	yes	yes
chim	A2204	8	119592952	119592973	-	8	81411728	81411918	+	-1(2)0(0)1(10)2(0)3(0)4(0)5(0)6(0)	12	-1(2)0(0)1(9)2(0)3(0)4(0)5(0)6(0)	11	ENSG00000177570	SAMD12	protein_coding	ENST00000409003	ENSE00001272978	2	5	0	intron	ENSG00000205189	ZBTB10	protein_coding	ENST00000430430	ENSE00001479734	3	7	0	boundary	1	115	6		BTB_POZ:81411817-81412140;	1.20273	2.52534	1.03	2.27	yes	N
chim	A704	18	55711930	55888990	+	18	61151654	61151828	+	-1(2)0(0)1(3)2(0)	5	-1(2)0(0)1(3)2(0)	5	ENSG00000049759	NEDD4L	protein_coding	ENST00000456986	ENSE00003587387	2	31	-1	intron	ENSG00000206075	SERPINB5	protein_coding	ENST00000382771	ENSE00002854149	2	7	-1	boundary	1	45	20		Serpin_dom:61151681-61170953;	1.69542	2.0925	2.291	1.859	yes	yes
chim	9260	10	103340231	103340231	+	11	1157498	1157498	+	-1(0)0(14)1(0)2(0)	14	-1(0)0(5)1(0)2(0)	5	ENSG00000166171	DPCD	protein_coding	ENST00000370151	ENSE00001859286	1	6	-1	intron	ENSG00000215182	MUC5AC	protein_coding	ENST00000358378	ENSE00001420959	1	19	-1	intron	6	6	17			-0.959247	6.23694	-0.904	5.662	yes	No
chim	9382	7	16837254	16837254	-	16	88494975	88494975	+	-1(0)0(0)1(6)2(0)	6	-1(0)0(0)1(5)2(0)	5	ENSG00000106541	AGR2	protein_coding	ENST00000419304	ENSE00003608609	6	8	1	boundary	ENSG00000225614	ZNF469	protein_coding	ENST00000437464	ENSE00001684286	1	2	1	exon	7	1017	9			4.31896	-0.756792	3.972	-0.848	yes	No
chim	A832	7	16837254	16839367	-	16	88494975	88494975	+	-1(0)0(0)1(9)2(0)	9	-1(0)0(0)1(7)2(0)	7	ENSG00000106541	AGR2	protein_coding	ENST00000419304	ENSE00003608609	6	8	1	boundary	ENSG00000225614	ZNF469	protein_coding	ENST00000437464	ENSE00001684286	1	2	1	exon	7	1017	9			0.829995	-0.169902	0.73	-0.281	yes	No
chim	A564	12	6341896	6341896	+	12	58007046	58007137	+	-1(1)0(0)1(9)2(0)	10	-1(1)0(0)1(8)2(0)	9	ENSG00000010278	CD9	protein_coding	ENST00000382518	ENSE00003610238	4	9	0	boundary	ENSG00000240771	ARHGEF25	protein_coding	ENST00000286494	ENSE00001598974	3	15	0	boundary	1	88	6		DH-domain:58007482-58009065;	-0.895738	-0.190844	-0.785	0.687	yes	yes
chim	A1578	20	62328165	62329681	+	20	62327187	62328352	+	-1(3)0(1)1(1)2(0)3(0)4(0)5(0)6(0)	5	-1(3)0(1)1(1)2(0)3(0)4(0)5(0)6(0)	5	ENSG00000243509	TNFRSF6B	protein_coding	ENST00000369996	ENSE00003487411	3	3	-1	exon	ENSG00000258366	RTEL1	protein_coding	ENST00000370018	ENSE00003680859	35	35	-1	exon	2	9	18	TNFR/NGFR_Cys_rich_reg:62328338-62328460;		0	2.81712	0	2.608	yes	No
chim	A2103	17	38784973	38796748	-	17	38785049	38796981	-	-1(2)0(4)1(0)2(0)3(0)4(0)5(0)6(0)	6	-1(2)0(4)1(0)2(0)3(0)4(0)5(0)6(0)	6	ENSG00000073584	SMARCE1	protein_coding	ENST00000348513	ENSE00001344771	11	11	-1	exon	ENSG00000264058	KRT222	protein_coding	ENST00000476049	ENSE00001827854	8	13	-1	intron	6	16	14	HMG_box_dom:38792355-38793745;		0.880273	-0.656435	0.81	-0.477	yes	T, TC
