# Supplementary material for: A Systematic Analysis of Oncogenic Gene Fusions in Primary Colon Cancer
Source: Oxford University Press journal article supplement (doi:10.1158/0008-5472.can-16-3563), 2017-05-16
Supplement: 00085472can163563-sup-176744_2_unknown_upload_3980185_ppd6xp.xlsx [file 00085472can163563-sup-176744_2_unknown_upload_3980185_ppd6xp.xlsx]

## Sheet: ERAS expr Colon Cancer
Supplementary Table S3. ERAS expression in colon cancer RNA-seq datasets from TCGA.
sample	rawcount	fpkmuq
00cc9b4d-a847-464e-979a-7751e1a87ae3	0	0.0
0134d0cc-e66b-4fda-804b-c4434ec00bd2	0	0.0
02a81bc3-4672-4d2f-808d-d27f4b63bf85	0	0.0
02ddfa3d-13b3-4624-994d-62e740fa4a3d	0	0.0
03109baa-936f-49ae-acb3-2d00ac03c7ab	0	0.0
0319a4cc-ee3f-4c6f-83e1-7cdd5f865dc0	0	0.0
04404d33-da5c-4477-ae6a-b968332c48c0	0	0.0
058ac81a-3b90-4e7d-8f7b-9c34fbc77997	0	0.0
05eef9f8-a246-403a-b0be-07d274b6f93a	0	0.0
075a759b-21e0-4cab-a6b2-c5d65f7ccdbc	0	0.0
08239d16-937c-4758-9e3d-38217e4c9f35	0	0.0
082a0dad-65e5-49f2-955b-ca23831b2733	0	0.0
087666cd-47ae-4f56-b947-d6aa1c25e8a7	0	0.0
08dd2c8c-537f-4d02-a4b8-9c123156f0d4	0	0.0
09977485-e1d1-41b1-b2b8-7ab0ad6df0a0	0	0.0
09f2bb20-909e-4929-8a79-c64c7fb2af31	0	0.0
0a8b5557-54ea-46de-b575-8d781ff86513	0	0.0
0c3d283b-1ef5-459e-b312-c97ea0b6d793	0	0.0
0c788954-4a2f-405a-b0b1-8d8ec4e701fb	0	0.0
0e7094cf-4c79-43f4-8b72-9de259e5e18f	0	0.0
0eb3094b-b498-4f54-8772-f322d7057da2	0	0.0
0ed65bdf-cb92-47c1-8aeb-42518ce639b8	0	0.0
0ee894a2-b2d9-4d06-bba4-dc1e915c698a	0	0.0
0f2b58b4-7d91-48f3-8901-b624e3d6aa51	0	0.0
1106a73f-5abd-4a2e-9e07-86ac7a737b77	0	0.0
11ec9603-9f69-4cc6-9c24-4b1d375c59c2	0	0.0
13abc91e-fbfc-4c55-bf54-fbd134979ccc	0	0.0
146b8525-8ea4-4976-aac3-080e14a80fc0	0	0.0
1580243c-8353-4c6e-a532-81121b912c21	0	0.0
15864159-be88-41c8-bdef-c2c5927cb1a1	0	0.0
15ba704d-dbce-4532-8d07-f6f93ed4c12a	0	0.0
161caa2d-589a-4834-9073-3824031da5e6	0	0.0
17510ea6-0c97-4bd0-94a4-63dd76e5b7c7	0	0.0
192fb5a0-8ee2-4c96-a3ed-e89904a3d086	0	0.0
1a587b92-0a11-47f0-83c2-77a2b6de1088	0	0.0
1b054b39-aa38-4356-8447-71f211365a01	0	0.0
1c48525e-6f1c-4ca0-9bb4-a9350cbca89f	0	0.0
1cbb39ca-efbf-4080-bd32-1b76006394a8	0	0.0
1d975006-4e14-4f2c-be5f-e09f58790d62	0	0.0
1e36b1ce-5849-48d5-8b9a-8102d833efc5	0	0.0
1ec0cdf1-3bc2-4f86-bc5c-8d9cd30982d2	0	0.0
22bc2908-b3ef-40fd-a652-b3384a79bc43	0	0.0
2328d034-7b9b-442a-ad5d-ad56d9c83d1d	0	0.0
25a62766-c783-415a-96bf-dafc8f109510	0	0.0
25b8756b-61b5-40f8-bbdf-7b2de810c92f	0	0.0
27af8811-03a1-43e5-8a42-8acf158e3e13	0	0.0
27cc2167-5838-41d3-9d57-4c6a13f7ebf7	0	0.0
2abfe58f-f168-413f-a56f-4c3c2aedbe3d	0	0.0
2b5f6764-5a5b-47dc-b0f8-7a548bab2e26	0	0.0
2bbbc886-4ec2-46f0-9c1c-4a6e8500c3a8	0	0.0
2bcd2efd-4fd6-40ee-86a4-867ae82711b0	0	0.0
2c09404f-c5e8-4e8a-a51b-c8bdbc923efe	0	0.0
2d5fbcf8-4347-4787-b04d-e84c88316776	0	0.0
2f05c173-adfa-40c3-baf8-02563270ff3e	0	0.0
2f220acd-b59a-4b9a-8a03-6bb8444ef025	0	0.0
30cb2eed-e635-466d-85cb-6e3d00828688	0	0.0
33188748-30a2-41f2-bf42-69da0f011e71	0	0.0
3381f3a8-9040-4ea7-bb84-76a043f5d6b0	0	0.0
3388b247-719d-41d6-a600-83abd6bd6204	0	0.0
339bf596-e9a9-4d65-b61f-294f410dd1c8	0	0.0
34a01f97-6758-45ea-930c-0b829a064944	0	0.0
37d2cb9b-0286-43a5-9538-26a8f0818ee7	0	0.0
3963e642-4d9f-47a1-bf0e-83462bcb7b13	0	0.0
3a93e1ff-bcdc-4dea-9541-54b074e4f967	0	0.0
3be1b9f1-f61a-426c-ae3c-a94517d0f9d7	0	0.0
3f59c9f4-10e4-4410-9515-9488181f54fc	0	0.0
40bc5339-8a6d-40dd-a5f8-d5eaebb91909	0	0.0
43b292be-5d63-4523-a43f-666d20039208	0	0.0
4410295f-d9fc-43b6-8064-17ec17d5fb17	0	0.0
44e21ed0-bcc8-4978-ad68-81c35852b12b	0	0.0
464cbc87-fa59-4fc9-8617-b697f3f29b02	0	0.0
49072d20-b1fd-485c-b9c7-6169ce301481	0	0.0
4e21fbbb-d38a-4af7-87df-055624c780e2	0	0.0
4e7c6811-88e4-4bb7-a88f-7491dfa6d072	0	0.0
4ea4ed16-8597-426c-9485-0fc8a8d81973	0	0.0
4f89b1c6-b0a3-4739-a77c-2458e6d45351	0	0.0
4faf76ce-1e05-4fd0-b210-2135200fe729	0	0.0
52e5f11b-9a73-4535-9e4d-720fe8feca0a	0	0.0
54597194-db70-4e06-846a-1650b7562c51	0	0.0
5468841b-023c-484d-8c94-c6ae239bb28c	0	0.0
547c5238-9d5e-4391-ab5f-b62f576af519	0	0.0
54bd3165-df22-4d55-9de7-b628133f4fb2	0	0.0
55aa6d16-3598-42ca-8844-0fe84739ef66	0	0.0
5697212f-b3fd-479f-84b0-ec0aae54534a	0	0.0
569ff63b-ea1c-4189-a5e5-8c44ee670cbe	0	0.0
586cc5be-d91f-47ea-9d1e-c3b65b2af33f	0	0.0
59608767-595f-402a-9f7f-356dd6e99a51	0	0.0
5ada9c2e-2b69-441d-94e0-71ef126a886f	0	0.0
5b9b9a3d-51bf-4f62-bf19-7c7ea0267030	0	0.0
5c18c6a8-9ad2-43a8-a3a0-83d8fc0cc257	0	0.0
5d362da1-aee5-403a-a16c-97d7d7b9d219	0	0.0
5f7d04a4-2a28-44ae-8c27-f5e60f244432	0	0.0
60bfd325-330c-4f93-8d08-bb2ab04ee292	0	0.0
62f84581-4c7d-4c8e-835c-9304bcec3106	0	0.0
649b19e1-96e2-4b55-951d-3b6ee9f4b91f	0	0.0
6525a459-76eb-4c64-b061-f674797f9b81	0	0.0
65cfbf50-1318-4357-9df4-094f6dbec49c	0	0.0
65ec87f8-ca6b-4b47-9700-ef1b67589dec	0	0.0
665cc2e6-600b-4557-911a-ad94340333aa	0	0.0
667dfd86-8611-411a-89ce-1de8b6089a20	0	0.0
67d1e5e4-91de-43df-b127-ffeef6070603	0	0.0
6815a151-f39d-42b5-b17f-b219fe9f73d1	0	0.0
692efd81-4aba-45fb-a7fd-35c10c79ebf2	0	0.0
6b047efa-258a-430a-909b-356c7c928864	0	0.0
6b5f99b2-d1e2-4133-8e61-a6b337e6e70c	0	0.0
6e2db920-dc3e-4a74-8cdb-470cb61e2fac	0	0.0
6f4f4e5d-d81e-402e-859f-3ee580a8bbde	0	0.0
6f699ea3-1d77-493e-9e9b-a3e2abbd2873	0	0.0
6fc8652c-24a6-49d4-8739-12cd70d947b6	0	0.0
708ac46f-4702-478e-b1ae-187e1a55b985	0	0.0
70f99dbf-42bc-439c-b562-c51b8e54234e	0	0.0
72174abe-f80f-4b7c-8cd5-aa00533486a8	0	0.0
72575c62-b2a8-4fde-8b05-ef6d76df0462	0	0.0
7261b656-c79c-4581-a503-15b653e2b5d2	0	0.0
7324b2d6-dd30-4f99-a101-7c3d497bbcb8	0	0.0
740870ab-fb90-43be-b226-7cf1efcf547c	0	0.0
751f84dc-7c2d-417a-bc1f-6d5771f6f09f	0	0.0
762034f5-879b-4e74-a75d-064aee08c500	0	0.0
77489a8a-5b35-4350-87c9-a588fcc0794c	0	0.0
77c07069-2887-470f-a1ba-66e5d038912c	0	0.0
77dbc29d-e3dd-45cc-b1d8-3bdd1711c704	0	0.0
791be1d7-104d-452d-9d2c-25276bc5f31a	0	0.0
79f11db1-6893-410f-8fbb-8da2a54d0957	0	0.0
7b2cd944-1cd6-4107-8aa6-11913ee32257	0	0.0
81903241-4091-45eb-baf1-90b10b727208	0	0.0
81a64df9-c073-4097-ba73-896396da3135	0	0.0
81bd146a-4ba1-4c7f-8cda-f4b11b0f390c	0	0.0
83ffbba1-e36b-4ff4-ba58-2d92c4b53654	0	0.0
86679663-dfc5-46ad-8cf9-c7954c4b339b	0	0.0
892ff51f-ffd8-4b99-afa8-0e29e5db2565	0	0.0
8989435b-4c14-4d4b-8cec-c9db8511b4d0	0	0.0
8bc10161-4cca-46c5-985e-e07349484ec2	0	0.0
8c0efc8b-3e41-47bb-91b5-e55f525c0776	0	0.0
8e0528dd-5f85-4f48-937c-9e1455fbda78	0	0.0
8e881aba-eee8-456e-a677-25eadadcdcad	0	0.0
8f77f4f4-b184-40c7-8ab8-2f95b13620b5	0	0.0
8fae8dd5-65e9-43ac-9b0a-080a77c71d55	0	0.0
902732ab-8a29-46ae-a06d-556ab3cb6825	0	0.0
9556ee31-e56f-4611-9d37-2b4d19841d15	0	0.0
95e726db-5ccc-4836-a2ae-7feaddaf9f1b	0	0.0
96f97dd0-3c7a-4a8c-a165-9ab14c9fcef6	0	0.0
978145ba-cca3-4244-8a98-9cedb455bd9b	0	0.0
988eba37-1b57-4740-b0ba-9491b57421ab	0	0.0
99b6e196-2624-48bd-8922-d7c3af7e0d36	0	0.0
9c22b778-e2dc-4fa7-a135-2b78926bb82b	0	0.0
9c64a139-1417-4465-8472-b44182874b0a	0	0.0
9deb4935-7e2f-43bf-b115-2e5a0021c5dc	0	0.0
9e189255-33ba-4802-934b-dd8a7898ef0a	0	0.0
9e97f017-6855-4d68-bd2a-c4da3ccb1d57	0	0.0
a046b793-0eda-4c57-adfe-b8800ece1dab	0	0.0
a0d07984-a6a9-4571-82f5-45fade1f1b2a	0	0.0
a1f37975-6bc2-4583-9035-8e8c70677833	0	0.0
a26d49db-2309-46a0-a3ed-275378d484e7	0	0.0
a56fc33b-c67d-435c-8e07-ce1a50e360fa	0	0.0
a6511301-e89e-46a4-8d57-c9803b0ac174	0	0.0
a6cd69d5-ea54-4183-aac5-2b6efb311db3	0	0.0
a77fad02-ff7d-4f73-8a19-caa329589dea	0	0.0
a902f09a-115f-4374-ad8a-4aace335fbbb	0	0.0
a9557455-b007-4c38-88d2-8e72379e0e18	0	0.0
b04b6183-ac95-4bf2-93ca-2890212ef3c6	0	0.0
b0556a60-d6c1-417a-96c0-a861eb45f95d	0	0.0
b1a7e378-a07b-4434-8a5d-d4756b7d523c	0	0.0
b26f9ac5-9100-4530-8582-11ab9dbfd669	0	0.0
b39f2bfa-5d4b-4bbe-9870-a93efff7bc5c	0	0.0
b4569515-17c7-4029-9c84-52aa7e1a7d2a	0	0.0
b49d2b1e-310f-4278-a7c2-5ea95c2c7c43	0	0.0
b53f9a9d-b24d-410d-b3e9-f2a8bf22ca27	0	0.0
b5af6c19-ecab-408b-bae2-53909b7135b4	0	0.0
b5bcd3d2-9063-43c1-949e-e3001862855f	0	0.0
b65c7ed9-f7ef-41ea-8d92-793a6630f424	0	0.0
b7b21fe3-2e21-4282-a707-da3c69a4453b	0	0.0
b9134508-ab9b-41ef-b6e3-745b85353a55	0	0.0
bb8a0f58-11e6-49dd-bdeb-0b7eb2fb05fc	0	0.0
bbb89e05-7c84-4905-9a05-8315c16d26b8	0	0.0
bbf586b3-2d8d-4a50-b5b1-7d0c75b6570d	0	0.0
bd2dfab3-88a8-4673-ba36-3daf252d0b4d	0	0.0
bd8839a3-4dcb-4688-b051-6f09c18d7fc7	0	0.0
bda1a9a4-a14f-4463-81d2-a4fcca65d6f1	0	0.0
bf8d10e1-1241-48fa-95a2-9e97fc58c17a	0	0.0
bf9c448b-bdc9-4f74-b13a-374e6add7939	0	0.0
c02d8110-3041-4a36-ac63-531216141051	0	0.0
c092a289-d058-4a3f-85b6-da3fde34568d	0	0.0
c094c9e4-260c-4b2a-bbf2-2fdcad927677	0	0.0
c182c07a-224c-44b5-bf0e-9bcfaa33ecc1	0	0.0
c2b0ac40-50ff-47e1-8089-c920a932ed9b	0	0.0
c3fe7418-c082-4c77-96f7-f22bd6210139	0	0.0
c419c0fe-74c5-44b1-89ed-887c2c3cfded	0	0.0
c41b924e-d405-4501-a981-1c04d70a841e	0	0.0
c49cf84f-cb19-4e11-9a71-4825bc906382	0	0.0
c4e074f2-e21d-4a1a-acf3-b7916f11fb43	0	0.0
c637fd04-9c6d-43fa-84e5-b90ded003dc5	0	0.0
c6e85461-d986-46c3-b6b8-ab56d97320a3	0	0.0
c789f723-e543-4b62-98b4-444e5079fa71	0	0.0
ca75e00b-f5e2-4904-a53b-36a1314e8e86	0	0.0
caaf2201-e0d8-46af-9d53-ae776306761f	0	0.0
ce03135f-f554-4ef7-9af8-c006486516be	0	0.0
d1878265-460d-4768-a67d-73d8d5a315b7	0	0.0
d23905fa-4722-4c97-8b75-ea8ae67faf40	0	0.0
d265829a-9e49-4e21-ba72-67f5ba406204	0	0.0
d2ef2751-f956-4490-88b0-6f619774ef5e	0	0.0
d3085a8c-2850-4e9a-a0d0-7443b14d207b	0	0.0
d314696b-bbb9-425a-8a3a-5d32ec57af17	0	0.0
d32c878b-e693-4eae-a615-7767371b3ae4	0	0.0
d3c40c02-3b30-4057-9295-d7b4dfd7ee2d	0	0.0
d51754a9-71d1-4cc4-868e-fe8d29efa4d9	0	0.0
d5607680-758b-4ee5-ae0f-a61f7c3133c1	0	0.0
d5c8759b-0dc1-4057-b9df-c9aa4a6b2a04	0	0.0
d5dca54e-d7e9-4328-b2ca-1d191a2b8b4c	0	0.0
d6224860-0b09-4d96-8a50-4acb3f72e904	0	0.0
d67325ce-cd01-45b8-b816-74fc73acd54a	0	0.0
d9a7bb79-e262-4976-aa25-26cb9baa2c99	0	0.0
dac5d05e-c693-4dd3-b06f-faba625b5f18	0	0.0
dade0b16-ecc3-43b3-b328-3819a8fc18c6	0	0.0
db9a7c76-8e42-4f1a-81a3-a9d4eb5365aa	0	0.0
dd2f8e69-327d-453c-bbea-81b0bea7f977	0	0.0
dd8003eb-e16a-424a-9092-520676779c53	0	0.0
de592955-56f1-498c-adf6-99e382102476	0	0.0
df2df36d-6652-4eec-b62a-ea99af075cb6	0	0.0
e02d06a3-99f9-49ae-b3b0-c4427951789d	0	0.0
e158f016-7605-45b7-8e4f-bbe313fc461c	0	0.0
e19da22a-2a4e-43ff-acff-12aeafa3a2c1	0	0.0
e2916399-9c6c-4d75-a22d-b180ea174644	0	0.0
e39de159-abd7-4185-8c20-ca6f27827f31	0	0.0
e4e7ec56-30aa-48d4-aef4-7e88f408a2f8	0	0.0
e52b5fe4-cdde-4176-a495-bff7c0f130bf	0	0.0
e5a78b77-957f-44d5-b69b-12abbfbea50c	0	0.0
e61026a0-2377-448a-a505-e110260e7362	0	0.0
e7675043-6679-4179-af84-dc401102aa8c	0	0.0
e86a03f9-e821-4f91-b09c-0e624239edde	0	0.0
e875ae4e-4645-4e84-b0ff-9c9a694717a9	0	0.0
e8f1fe81-08ce-4db4-bd74-5f9d4b4143f3	0	0.0
ecdb94bb-54ab-4d89-a13f-be2e65fc89bb	0	0.0
ed228bb8-2573-4860-94db-7fea3cb44438	0	0.0
ef4fdb47-ab17-4055-b8a5-ec3c2a4b7041	0	0.0
f346f2d2-285c-455c-ba34-ea8eec3fa881	0	0.0
f3e7201c-725e-4dd1-8938-24f7637785db	0	0.0
f4b179c1-9d27-439b-a1ef-3dfbbd684c15	0	0.0
f590941d-19dc-427a-95b6-942c97ea8333	0	0.0
f596eabc-e39a-4e35-9fc6-edade04eb785	0	0.0
f6893b7f-2472-416b-b137-33dae673d150	0	0.0
f7add57c-753b-49c0-8d79-29fa86ddd615	0	0.0
f7ce175f-763e-4a55-97e3-0381d889b0eb	0	0.0
f8b2b799-dd9d-467e-9525-a01f3f62847a	0	0.0
fabefb10-5546-4017-8ea1-29982a10fb3c	0	0.0
fc477ec6-19af-4eb7-91cf-a8a16392f034	0	0.0
fc5dea3c-dfa2-4d52-ac5a-49335d6d5eaf	0	0.0
fcb5f382-f06f-4885-8ea1-c0699b408838	0	0.0
fd40f0e5-0825-409b-8a4c-86da09f0a84c	0	0.0
fda5b844-1fa4-462e-bd3b-482025f6ee30	0	0.0
fdd24a0e-f3ef-4a5a-87cf-f99884b90fb9	0	0.0
ff8de5e6-76c5-491a-8fac-41492723b780	0	0.0
020aa019-a3a4-4055-92ee-be824a597501	1	414476933219
05261012-4f7a-4c5e-a1e8-ffb440ec80cf	1	91106045615
056fe861-9f3b-4693-999a-44d1d7c43ab0	1	846612449605
058cd2dd-6bea-4188-8bb2-3314723c0762	1	924117479359
079e4d43-d129-4ad1-b5b6-7a798f440792	1	281024429594
088506d0-2717-4a75-b353-88bc1a225212	1	168779789633
09796233-3f40-4deb-b77d-2267c3afff59	1	356810577293
09dba56f-3033-41b6-9235-7c78f88e14ed	1	725501185288
14ea1c20-2700-4de0-88c0-154b116b1b8c	1	690462775771
171f6436-748a-4072-9ef6-e90d8cd9b465	1	336445283988
17c88994-9e8e-4f16-8c41-34e98a0d8c52	1	369322929506
17e4f239-6e6d-4a5e-942f-eec14d46ca10	1	356287512621
1df73dda-ad92-47ea-a4f3-3713a416459f	1	495539156513
21981535-9a4b-44ca-a3c0-3f52f4c0d29b	1	355485785545
228845f8-1ad7-4193-a570-e17871798c67	1	846612449605
28004569-048d-4f8c-99aa-7a8c69a98dcc	1	285390449095
2e81bac9-aafa-4aba-ba62-327e3bc8dc51	1	385124044604
2eb058b5-5b46-4568-b362-e7e2332babda	1	112841345069
2f6070c7-99d0-49bb-83ca-33c032650cde	1	327483173915
31cf7af3-5576-4201-912d-5948fa2c0296	1	586406396052
32a115cf-570f-4ad9-a123-8e1970062f51	1	289575443307
36263f87-1956-499c-ac90-dee060c5bdd4	1	942588801291
36f45f98-2390-4c73-aa64-079e175034c6	1	391615971979
3793cde5-8027-46ad-9003-6a9a43076764	1	412906124141
3abbd2b5-04db-4fe0-8dd1-ea2b48caa4c1	1	384187458892
3c6178fe-0add-4c72-96b2-a3aeda20f36d	1	927100252913
42e6517c-02ff-491b-8315-9ef163e6cfdc	1	908963654179
44f1dc34-a01e-4a7b-a7a1-a90064039fdd	1	941745949904
49db2bf9-49aa-41d3-ae5d-3aaa26ff40fb	1	497803318407
4cf333ec-bd88-4349-9c72-ee06d32e8cd2	1	356167023101
4d45166b-ea6e-4e27-8d91-bda8135b87c8	1	493989628194
51cca578-4550-43e0-b37d-3275339748cd	1	141114678961
535e80df-ea81-4f5d-8f2e-e74ca97e9b01	1	673392511067
564daa81-cfef-45b6-94a0-3249b2724d9b	1	200989673151
59e2ab4e-9529-490d-b12c-9b7f24c8166c	1	969189466849
5a58850f-397c-4786-8141-2d57dd974673	1	346594741326
5ccb8845-93d4-4ce2-b97a-e230f1da4611	1	94034454224
5f5c42f3-3631-43a3-9774-164eca819389	1	930650268609
5faf3586-b033-45fd-8dd9-fef111b0f752	1	422909605398
5ff1be40-73fe-4cd2-9b58-4be53fdf8292	1	583805924229
61d0e01a-3e40-4929-80c8-36f797c6771f	1	74237727019
646d58e7-b7e2-4b2b-bb37-3ca20b601213	1	378526136567
678d7cdd-0a63-41b2-9203-fa1385494399	1	285881076903
6b00248a-8ec4-451f-91f7-626bb223b14a	1	948246597217
6dcbab48-76ea-485d-a2f4-764c61f3b503	1	108837673508
72a79a28-907d-42b8-9722-93448b87c3d2	1	342128604432
74fd04b7-c554-4bae-a1ca-6b792b0521a1	1	454220480438
771bbbfd-e1fd-4dfd-b822-3e091ef656d2	1	495228473656
773c7ef0-9536-455e-a3bb-3bc8d835af01	1	442329226085
789db3c8-c5cd-428d-aaef-e3f60c40bc9a	1	477346678037
799199d9-0ff7-4d58-97bd-08009f64947d	1	345533427595
7bb97da8-8db8-4f9b-a9ff-54b644019412	1	35536583758
7c12c6da-5e8a-4cd1-972f-e76178e09b7d	1	288939886779
7da3a50b-ee97-472f-8a13-523e80202c11	1	616619371961
7e5759aa-8b94-4c50-8d62-779c69e29b79	1	411883413105
7e5fbe6a-4463-424b-b024-b207d4a89962	1	291149802979
7f9cdd9b-cba2-4847-82e9-4e1df1cd9857	1	667136330643
92107b4f-bd77-4401-9065-4b9704110d44	1	361257450483
92bd3edc-d6f3-4cfc-be03-4662199a06c2	1	649580111416
97675f21-ce94-4e7c-bc46-179cc2903bf3	1	565114945793
9bf28651-4429-4fe5-9e9e-dda3a2aaa221	1	365013593106
9dc13355-5e6a-4d51-a58f-816699c1f466	1	848431165931
9df0a5b7-5bf9-4795-9910-bbf7cccf6fda	1	49937690247
9e8b528b-1172-4c07-a09b-ebb23cf2310c	1	408053423986
9f43c5bf-0fc1-4339-81a2-1d315d6940e7	1	374177837746
a58a7a42-4dda-46cc-a9ec-4a3ca597d972	1	355325872911
a86552ef-96e7-4cb8-9c94-157f57fc6694	1	947109610889
a865bc94-a60d-4927-a842-8c0d6fced029	1	474693158342
a8cccaa0-76de-4b73-8f73-85fce2bc278b	1	272000487425
a8d7571b-7539-40ac-8be9-209aa54769d2	1	351413375812
a8e396d2-9528-4d8d-8e22-f56be5397cc1	1	122463475269
abe20df7-6b97-4397-8864-881bac27e92c	1	90791886837
ace439dd-127d-4f64-8028-506fd5ea03de	1	354846997072
adcc8dd9-0bb9-45eb-b44e-013c7167dd83	1	487586058939
ae9b8c3d-6bf6-4b5c-b2f0-c9ddc334634e	1	408422655368
b1684b0e-0c14-434a-94b0-78c42adf4ea9	1	117368412404
b1868d9d-ef06-4353-883b-230dae23f8b6	1	673967078056
b2d38886-f7a9-439e-86ac-d99d45447cc1	1	875708886343
b3766385-e86d-45fc-8baa-61162749feff	1	424671728754
b520edf2-42ce-4b64-8575-19e34b30f042	1	453959434185
b539ee0c-6887-4566-b16d-0990c8e1a3c1	1	515257283419
ba11a188-132a-4a25-b2b7-f958694976e8	1	589469713046
bc26fe03-e143-4cdf-a1a0-c604f22d78e2	1	838523795628
bd2b70a7-7a80-4ede-833e-ed6365552684	1	382142919923
bdad6b32-b7e2-4bcc-baa6-31b3c4ef2ea7	1	215228723565
c12e6882-8bb8-448f-917c-dc9844fca4be	1	32468992518
c2357737-ad60-4603-9ce3-4b30cc45d30b	1	30882197849
c264fe3b-482b-44ec-83a4-73df565663ff	1	296616378326
c3f9ba64-6946-45d4-984d-b33ef2589603	1	34421589083
c55df672-3e6a-4625-bee3-4736808f96d7	1	924929057941
cf9d1a47-ee65-4505-a2c8-12d04366aa28	1	90791886837
d0ff575f-1259-4a78-b74c-16e48a7d4e38	1	42766075554
d2587070-cb7d-440d-ae49-52f5077248e6	1	282911681763
d469975e-a3a1-487a-a549-142720e1973a	1	795457618814
d4702ec9-068f-415a-832e-ed72eaa38699	1	511669256992
d49b2de9-e099-421f-b94c-e6dd2181bb16	1	127196363202
d5b4d77f-feb9-4a79-84a0-22849eb18112	1	395587537489
d64dbed4-65e5-4a19-ac6b-d8e7a06169da	1	469055472376
ddc5dfb2-e7e4-4159-930e-120c7d2a8640	1	297622236429
de19faaa-60f9-4b3d-be28-00505d5a82e5	1	251577168718
de808f1a-676c-4bda-afcb-bf61577324f7	1	398531491161
debd6982-7c27-42e8-b778-20afcc78a5f3	1	396979226276
df959336-a712-47a9-9042-b2b6bc01e813	1	775351573479
e53e1a83-1979-4e12-bbb7-79b37d0cfe03	1	570729346446
e69b55b8-7988-4881-be5e-22e20d42197f	1	385499958752
e6bb29b7-b632-4e61-bc17-ef2e9173289b	1	286607189943
e86b6f79-cd01-4530-b315-c56e2fb0293f	1	760972461929
eb013d15-9a9d-4645-a009-a0d83a7a4590	1	64270904433
eb2347cc-da91-4f84-a56f-ebc759d22915	1	339920135764
ec78640c-f4de-4d18-bf7c-9e5391feb915	1	370753069928
f006e10f-a564-425c-8d92-0b8c3d5c038f	1	119680214467
f0b34dc3-72b8-48d0-a755-354c74405264	1	159251898283
f1038bc1-954d-4476-8abe-85093c206a5d	1	473271069791
f3895ae4-1228-49b3-9342-3c3b86cb5243	1	508376132249
fa73bdce-67fb-42aa-883f-635f0e7bcdc6	1	731379088409
fe898d64-faa4-452c-b8ef-cfec7250a286	1	337271313186
00589871-e54f-492f-988f-502670edd606	2	158652154754
00f768f9-9e6c-4e84-bdba-c19368f7e522	2	596424287292
06c8dfda-b057-47cb-b435-9c2739694f6a	2	530705914492
11320586-6000-4f23-8e68-926175cfadf2	2	211553911076
11586a7f-5148-4b6b-b431-686b907f8df9	2	689935071935
11d08d8f-beea-4b57-a9cd-2f957a391360	2	712655387826
1880aacf-cd87-4a9c-8d53-16507475f3a8	2	720455515204
18ded814-596a-46ed-8f58-ba4141e5abb6	2	759509053348
1b843dbb-5ef0-47ca-9783-dbeb94aa6df3	2	929281665273
1c1a1ce6-b06e-421b-9f0b-a9215d553666	2	724835435175
1e50d68e-ac09-42ad-9678-bc0598328037	2	813061673167
2358eba8-2134-4fa7-8177-b8919197f014	2	178103588609
23fb4808-3b58-41b9-9c15-0ef53cafb713	2	893034952495
2c1aca0d-6c50-4f1e-9edf-fec9ec32da69	2	793161205454
2de834f0-d5dc-46d3-9411-3db9635e9b99	2	208965453831
2f69766d-36f5-446d-ac2f-edf68ce4eaa9	2	15766255798
2f906887-7836-4f24-8f97-91b10811a7c3	2	620494434785
31ce5f7c-5f1d-4e54-9343-5e9b57f5ed10	2	585428508788
371cce1a-08bb-49a1-9e85-645d4174decd	2	139927265807
37e498a7-b147-4c38-a3f5-ed283d57f97a	2	714185728284
424d8e5f-9fc6-470b-ad2c-b4447b0eb07e	2	873288463772
42c56861-1c90-41e0-a5d5-324e5fd80ea8	2	756599056975
4dba6abb-15ab-436d-baf9-232e436b19f8	2	310980084835
5654a36c-4d18-4746-8a4c-b7b616f99481	2	634258288051
5cc11a29-89a1-415a-8503-c0821751d1d1	2	467701526449
6947d9d0-2d4f-444e-889f-7dafccb67251	2	728008677863
6ae2dd6c-2a39-411f-a1fc-11e0e6e82165	2	5877153389
6e0407fb-7b98-4cc8-a6f0-f6e7f5935eca	2	863385069525
6f90946a-0a30-49e8-8699-7a8890c01aed	2	126180417809
72c3c054-1cce-46be-a01c-86b96aeea1f8	2	635725887712
73ce143e-44f1-49c6-963f-45246d8551de	2	180340049197
7f9a629b-12ed-48cc-8d5c-1c2f5db9cf1f	2	230708847165
80592959-da54-41d0-9b82-ed279be3ecea	2	149458735191
81d8c120-144f-4ffc-9ca4-eb76ca1fc821	2	200989673151
8a266c03-d5ab-4047-96f2-a850cc7215b8	2	569289668816
934f9dc6-1260-4268-b022-870f1e37dd6f	2	202795742101
955e7043-03a9-4a8e-8e7d-cfc52546da82	2	180134416301
99b406a3-0ef1-4486-99a5-22a751aa5e1d	2	650382392328
9a62fe1f-36ec-4e8e-b3d9-bdfc62f71905	2	131758034276
a1677081-1019-45b1-be7c-420ba066a421	2	567857236148
a3f88a5d-7169-465b-bb80-e5999590681c	2	754431151368
a42c7fc3-4f41-4b15-b1ec-2108fa916f6a	2	710412065639
a4de3403-a3ca-4c5c-baf4-99e7068fa0d5	2	166863356849
af65de12-4ba6-472d-ba11-22ee07004ba5	2	875344967981
b57f69a6-91ca-4131-a654-5495f6dd1131	2	891523042305
baf57a44-5eb7-4fdb-bbf6-ee006a122360	2	655034241096
bdc7d801-b93b-4464-89b6-0148d066c947	2	660511688497
bf4c7278-d90c-497e-97af-cc9c68ca1525	2	926964254636
c14f98e2-8e9b-49f4-a244-3d06c6cb7126	2	202082357654
c4386236-99df-44f4-b0a7-822e32e050f0	2	821945281459
c71d0557-242c-46d7-8551-ca0eba56fdd9	2	113245794334
cb76d1df-ba6e-479d-8858-005c17c94613	2	731040643667
ced37a67-bf80-468d-8299-940bb9b88107	2	935333825319
d0fbe329-d4d8-4082-99a8-da1a1283963d	2	684183122981
d334512c-d092-459a-aab7-a3a0e281d9d4	2	284644834408
d4653ecd-d656-46a6-8161-da29271ca88b	2	178758566446
d547863f-18eb-4c29-8265-953055c129d3	2	178304608461
d60b1d68-c859-43af-b9bd-1a7dae06c804	2	161201921527
d753b828-373f-4ebc-a300-598e0c6e79ba	2	635214648558
d7b9a594-2898-446b-a234-60f8ca8064a0	2	695937810997
dfeb2d54-28da-4521-b488-bdac246bb59b	2	552177151683
e0d6a42a-2efb-4b3f-9b59-da07dadc01a4	2	1655952653
e2e19d54-e271-4d94-af60-8a2fc470a22c	2	636302016298
e7b00f7c-3aed-46f9-9126-0da4f4e74320	2	665800792736
ee926a57-93f9-4eb8-86da-224f5daac92a	2	807245187002
ef8d5ef0-1834-4a2d-a916-4862ce9dc136	2	191025251628
f1fcd165-ddbc-44b8-b062-ae5199c53cba	2	918609583349
f36f74a9-97b4-4913-86e2-56ebaf55f006	2	832448336695
f38b2f21-c5a5-4699-9727-eae9c96aac55	2	789494668148
f50722f7-d55b-49b0-8c11-4502b9cf42d5	2	210637177462
f749b616-111f-42d6-b71c-8a3a604f2f3d	2	769123091998
f96e90ca-9211-420e-a75f-5f30b67d2d95	2	607841027689
00106523-5b1d-44ad-a9f1-7d84db08722c	3	117499355222
0fa55c0e-6f8f-44a6-82fe-9a42495d3484	3	138739358691
123db725-bd0a-4b20-ba1d-9cc3a8948f70	3	114753910239
20a523cd-58e9-467d-bed5-1bce2a8574f8	3	239118894697
29dab10a-a0a0-4dbd-b574-97c22b70a3f1	3	249965004899
3254c984-f9ec-4db5-9add-94489e000a62	3	105377131582
514976b1-4fb9-4924-8bbf-ffbf5d7eaad5	3	100452235966
636b2a02-fffa-441c-81fa-d6d0c5c5a270	3	14124084318
6d2ad70f-fc8f-4881-a08e-bfd2128d7652	3	107236938407
6e933523-30a6-46a8-833d-7379b88c1c14	3	321965794354
708a16a3-7a5e-4e27-b06b-4c3c308b11fe	3	362334594258
70c7147b-b316-4409-8073-968dfd14abec	3	215033416193
7a0818ac-0f38-4e44-87da-55d812e447cd	3	945692206503
8f9232c6-4ae9-4e3f-af06-335f107b09bc	3	189459783845
911f6378-8a25-4570-9d3b-80f5b5bfc085	3	102505385377
97503aa9-93a5-4ff6-bb19-203ea235c2bf	3	183410854988
9c52ed00-325f-4664-8873-327bcaa5ea74	3	303803621339
a9560d7c-294e-4dfd-aa10-4ab456d8b124	3	1250814593
b41e03d7-e756-4eb9-9f6e-100164d981d2	3	120226699465
bb5ddfe6-cd9a-4702-873c-9607e6522161	3	899048941078
c0085daf-b7dd-4c12-b347-6949c2421934	3	12843730333
c04b9aba-55bc-4ba9-b761-3fea9f0d4c90	3	262712665903
c6972d82-17ef-4d72-8827-a5305d55f784	3	10139787105
c868cbd9-3767-4f6e-8fa2-770d80cf2b05	3	887183918549
d47d93d3-64e9-40a3-a941-33432fb31a1a	3	103978422398
d62ce057-d970-4bb0-b929-923c7bfb9e11	3	845781474595
de796614-444b-4e3e-b4e6-fb3a78ef6f65	3	164047645998
e4b288d5-b877-42fb-a525-8ed6424338db	3	991285608218
eda58f69-4a60-4072-aa1c-541a90d2d80b	3	100229174006
f6d0eda9-920f-4986-82fe-1a327e3bd209	3	991492990145
f8484afe-c7e4-4952-8b17-551a2c266764	3	322403843054
fc822b3c-b73f-4529-960b-e3bdfcff80ed	3	107957551091
066a17b9-c724-4390-9a5f-d46cde556de3	4	177727895482
07ec290d-c41b-42eb-8cb2-07504451f732	4	493680884676
0ee26933-679d-4e84-ab56-6b9581e5dbfd	4	157270167343
1f5ff5c6-64a8-4214-b304-634aae40202a	4	137387005628
2a2b0e0f-d54a-4902-8778-500364fcc0c5	4	11008911714
3a210a05-77e2-461f-ae98-f53df573d8ce	4	174996270392
51529d00-9bc5-45e7-9706-7519c64eef36	4	11685835088
562e2cb3-078f-4796-b8a2-a0196713ebac	4	220524003624
583c83ca-b9dd-46d2-811d-a4cde176ee24	4	137941831999
5ac3599c-0254-4931-8dc8-3c3294be3cd7	4	797868096446
5e2b0dc5-c09b-4334-9f2f-c8e75380d45c	4	188293066861
8894d65e-71ff-4d4f-9abf-b0d3c6917a0c	4	131061190996
938e4a22-7ed8-4b09-aa65-0cd737beee31	4	11301288248
a202e636-8c19-4ce8-9902-bdd7be7a3447	4	13601195273
bef7dd4d-624a-4b35-aab8-bf1c99d3bf01	4	205032943668
d15c1117-5ccd-47da-bb0a-51e5a71535ff	4	308852166366
e2bdca76-7bc5-4143-a6f6-3c6642425c65	4	49600591239
e4a20e3d-51ce-41a1-b200-0dcbfd01e674	4	108884558006
ee4dcccc-514b-4cc6-ae63-6ed3e7519a40	4	113612285578
f3ca8406-7724-4096-8f4c-31f39ae25901	4	145200260199
f5c9ea63-ff66-441a-9a6b-055fdcd7cae9	4	212228894168
0ee30795-d8ef-4ce1-b3f0-084b7a39bf35	5	242148809161
5140a52e-42c4-4374-ae49-b208aff98396	5	323725170279
587e44e4-87ba-4981-a520-d20612486f53	5	139470189014
737a6ce7-5446-4610-bf9f-5c46b769b842	5	208772146288
7800bdb2-aa8b-43e0-8e45-1b968872b34e	5	694103177049
7f5a924a-ddf3-45ff-be1f-5b5909305f46	5	4422673099
966ad64a-5a6d-4219-ac8e-adbfb9a79cad	5	204555073283
9ab691dc-cbc9-4bc5-8bd9-865783762473	5	163690688111
9daee176-d523-4450-8ac8-0f69d028399e	5	314196267097
acf69ad9-4284-4fba-854d-4f792818bdfe	5	258980136224
d65a7cb6-4b1f-4976-990e-c4f47ae11986	5	458172514781
e5b468e1-f932-497d-8045-e75588701aac	5	250957717389
e82223ad-33c0-47fd-b0f2-982da64d0cb2	5	18576891239
1b563146-6ead-41ba-9117-c9b1c5d4127f	6	2608689414
6fcab48b-754f-4058-9cbf-b6d766eeda35	6	557568999164
dd9a3ab6-6c93-4b47-9b4e-62e56767054b	6	247001250444
0cb305a5-d4a7-4eb8-8e8e-d11a5ebc3e0f	7	259466255672
51e55e7a-5fef-4451-af1b-49ed4ced9ac7	7	637742319305
90a46dce-5762-47ec-925c-deff853069aa	7	232320416318
cecce47d-5d1a-4473-bf62-48b9bf602534	7	261552786583
82e00e45-734c-471f-ba97-79ec3b7e0baa	8	281099436115
07d449a4-27ec-4f3f-a922-25fb777d37a7	9	184409980268
6314b0c4-f403-4c6b-91ba-02bacf1c6de7	9	350888684074
63691c59-d630-4b06-82bb-3d0587638a33	10	384000688129
9c2cd1ea-6106-46c6-9966-5e9f4de8665e	10	342536606887
3eb03db7-efc1-4f20-bbc9-61551905eb9b	12	109453498681
eb799eef-5506-4935-9649-c543a1d1bbd5	13	341034951885
c8544a8a-4352-438d-94d4-3495af2e9a78	15	546006508398
0422da40-5671-48c5-bbe0-e32a476c5cda	32	751604558294

## Sheet: ERAS expr Stomach Cancer
Supplementary Table S3. ERAS expression in stomach cancer RNA-seq datasets from TCGA.
dataset ID	rawcounts	fpkmuq
024b4b7c-51b1-42da-96db-5933c34e762d	0	0.0
024d6c1e-7140-4fce-b21c-4a5237d6c850	0	0.0
031427bb-a5ad-4e3a-909e-51e1548d81e7	0	0.0
043d917d-4265-43ad-be01-cf857ddd84eb	0	0.0
06a28e7d-c54b-4b6a-befc-a17ab6a79767	0	0.0
072beb58-7a12-49d7-b49f-008a774ce6bf	0	0.0
082ef2bf-a31f-4e7d-9553-40977d5a2239	0	0.0
086afb05-0f3f-41b9-8cc9-226088794af8	0	0.0
0946b4a9-fa60-4587-95f6-acc3e3d84a2b	0	0.0
0d9e02ff-8f02-4755-9fdf-9f1f0173d98b	0	0.0
1220070d-ecbf-4fb6-ba7b-5876a9e1ca90	0	0.0
12e6b7d6-f93d-4ab4-90e1-59574cf0d5bc	0	0.0
12f427fc-2db0-42c2-b477-c8c3f45044e9	0	0.0
16557678-7173-4537-9a65-60dceb827433	0	0.0
16afa649-9060-4b95-8072-f018bd4854cc	0	0.0
1fa9dd31-dda6-4598-8a67-c20e4d415c6a	0	0.0
27490b93-a256-4a5c-994d-593208a8b499	0	0.0
27e73964-234d-494a-a7cd-17ab924b0d22	0	0.0
28bfefe4-61de-4e9e-8027-686fd9dd425b	0	0.0
2cc4e9d5-f811-4611-9ad1-f5dee97b5c23	0	0.0
2d9de862-f644-45c2-9c96-d5d24d05f3f2	0	0.0
2e7840e6-2d64-41f7-afb3-bc0be331a80f	0	0.0
30cf59eb-b193-478d-86f4-9ac35fa7232b	0	0.0
329c4b43-fba2-4497-8a2a-210e75299674	0	0.0
32d19362-1f02-4584-b30a-758c1ba99c8a	0	0.0
336731dd-7471-4e09-a622-41b835bdadf9	0	0.0
34cbab94-3d2f-429b-9c67-4a491bf6fcce	0	0.0
37de2b18-fc23-4364-a57f-28ee207729b9	0	0.0
3bc29a02-86b5-400e-be79-e6c76552d52b	0	0.0
3bc6379c-fcac-488f-91ed-bc60d0abf472	0	0.0
3d273bb9-8fd4-4cee-8898-6c63c8f96303	0	0.0
435d039d-6952-4999-aa24-60f05dc8d00c	0	0.0
451269e0-e2db-4e12-b1d3-d2b07c2c3b57	0	0.0
46da4db8-8504-4f8e-b97c-964cbd2dd65e	0	0.0
4a37f4eb-efe0-4e09-b4b7-60c1467657d0	0	0.0
4a4bd28f-9f5a-4e6f-8804-1ab0a6761be2	0	0.0
4ab18730-11f5-4d7d-88af-bc097401f9eb	0	0.0
4b333938-8858-44e8-ad91-6bf86c01f9e8	0	0.0
4b433fc4-5e9c-4305-960b-e7b43cfbee36	0	0.0
4bba621f-d7b8-40ae-8ddb-344e0b6ae639	0	0.0
4cec94cb-d067-4b23-a74b-98da46134562	0	0.0
4feb4700-31bb-4c50-821c-f823614f27e1	0	0.0
538ccdcf-15bd-4f2a-9c0f-9fb7b251caeb	0	0.0
53d955d3-4c8d-4549-ba45-8917953e63c1	0	0.0
551d8cf2-9613-4bc2-89e4-c21a4a94905a	0	0.0
559fe14a-1ebb-45bd-9fc7-2ccd5a3414e9	0	0.0
5842e504-1884-4043-a025-a53d22267f4e	0	0.0
595061ae-18f2-488a-ad05-eac7c2548a99	0	0.0
5ab45877-d918-435d-af1a-40aeeb60f957	0	0.0
5af6a287-b622-4a43-97e2-f40153d89833	0	0.0
5b867b06-f140-4fd9-9eda-6c78b6bdb87a	0	0.0
5ca25e56-8607-4473-a543-b3be515d5236	0	0.0
60817736-cc15-4f46-95d3-5da374ab246d	0	0.0
637b3148-f0e2-4c0b-87e0-5f33f32a9e95	0	0.0
6410067f-e1a3-40dc-b7d1-2b0dc926b72c	0	0.0
65abeb47-0c36-4926-ac19-81dc9d9cc16a	0	0.0
65c97df0-9a41-4991-bca9-b3658ef2a914	0	0.0
67cf9d8e-0cf3-4141-bd85-a68689271a47	0	0.0
6a5dd3ed-c946-461c-a98e-c19e73ba3ef6	0	0.0
6ab7a293-ffd5-4852-9856-448df21b9b08	0	0.0
6c45388f-00c2-4052-ab22-833d9d76fcf9	0	0.0
717d9887-98cf-4460-911f-13a93f31246a	0	0.0
73202a91-d390-4c09-909d-82e5c893c454	0	0.0
773801e2-4938-4bf4-bccc-6e1694d2d4f5	0	0.0
77bbd40a-f17f-42b0-a3a3-7a81d37f61e1	0	0.0
798c7adc-05f0-4672-947a-1a53a9ed7340	0	0.0
7c169d29-58cd-4f77-9e3e-eae41234e936	0	0.0
7d03109b-45bd-4f4c-836a-78d59e38fe4a	0	0.0
7ee0b15b-35de-4df0-a904-d92f86a4cd28	0	0.0
7fd04c4f-8993-476d-85c2-550ace1c0251	0	0.0
82ffe38d-a03e-4b2c-93bf-8a10cd37ed51	0	0.0
85593c7d-7441-4d41-81d3-aaa17c7e398b	0	0.0
88cff3f6-03c3-494f-a85d-d29ec76fda97	0	0.0
8a1347e6-3475-48aa-af4a-87b7866c4a85	0	0.0
8b82d46a-1c02-4cb7-9588-e25105650048	0	0.0
8ccbef7d-e2ae-40b9-b1c5-d0508ef3335e	0	0.0
8d5ca6c8-3174-44e8-8ceb-e97079fa0a93	0	0.0
8dd6d0ba-4819-4c05-a89d-f259637811d3	0	0.0
8f8c0743-cab3-47a2-8fb2-b59d8ae1088f	0	0.0
922886ab-07a2-41be-8c0c-91d0719f19b6	0	0.0
984ced86-0cad-4c98-8d1a-09305b1f8cc5	0	0.0
99df0f6e-3265-4ea6-84a3-58f1559f632a	0	0.0
9db33b7d-bc90-4257-8063-5f13a719e3fb	0	0.0
9e18e4be-2f38-48f5-bef5-168986c06b0f	0	0.0
9f33b653-6241-4d18-95d8-fe6ab4126524	0	0.0
9f635b0b-54a6-4d5a-9651-98d7d765a738	0	0.0
9f7d79d9-9c55-4c90-b7bf-b35ae035d329	0	0.0
a1525390-c148-4d1b-88ed-f6f874f39387	0	0.0
a19ad370-5686-45b4-84aa-a5b95f875dc8	0	0.0
a1aa5ebd-8038-4737-84c1-298526370e11	0	0.0
a2171910-1526-41fb-a57f-14e01c1afc67	0	0.0
a47576ed-29ae-4bdd-8c64-d154637172dd	0	0.0
a7ee0b2a-298d-4e7a-88f8-eb466962e396	0	0.0
a8a9595b-e0b5-479e-8b7e-33595de6f4c6	0	0.0
a9d18d0c-c95b-41e9-8e6a-277c8654762d	0	0.0
ad3d7176-bc4a-4bd3-a3e9-3f62965dd9ba	0	0.0
aef12c8f-bbc6-40e0-b1c8-f48f483b5770	0	0.0
aeffc030-7e5a-478d-bb80-18c25ca041ae	0	0.0
b287a691-9eb4-4fc5-a3e9-bfee3464e59f	0	0.0
b644e04d-236c-48f4-9945-ae046443a823	0	0.0
b70f4e88-ec19-4a3b-bc7f-4a0a424f8f21	0	0.0
b810e759-2e8f-4b30-9d76-d0c11e93ca1e	0	0.0
b83f2e47-d850-4df3-b73f-4ff07541b271	0	0.0
bb3f1370-3234-4328-a9fb-8fa92da0d071	0	0.0
bc9e63bf-fd1c-425a-8976-bc222413c489	0	0.0
bef94553-3989-43a6-959b-59a4d6e42175	0	0.0
c4ea0940-b860-442b-a1b4-1bcda3b10836	0	0.0
c62038a4-a876-4251-b74a-767bbfacc9de	0	0.0
c6c6ae06-9037-483a-8619-86504a194e3d	0	0.0
c6ea6060-af39-42ee-808a-ae333401f08c	0	0.0
c763732d-3465-4723-9faf-5cc8f253c7b7	0	0.0
ccb080ac-19bf-42fc-8645-ec9a770d6f17	0	0.0
cccaf249-67eb-40ad-ab06-371e5113325b	0	0.0
cd3fbe8b-71e3-4437-983f-809f1ae5e9cf	0	0.0
cd9bd9ec-7a53-41b2-a4a0-9e9e81e2ee89	0	0.0
ceb3a35e-d4d6-479c-941a-d0969d4136ce	0	0.0
d2fe9a94-a39e-442a-9731-54d821cfa6a6	0	0.0
d30665c3-85fc-4364-b9ca-fa81fd916137	0	0.0
d4fa1e61-bbc6-4ba9-aeec-4cc89ce539b8	0	0.0
d7933236-0f3e-4c99-a664-13eb55ac5394	0	0.0
da599370-9aab-4f2f-8fd0-93c2be5b35f6	0	0.0
da9399eb-a43c-4fdc-a0e6-af1642006ac4	0	0.0
daab6e10-ff63-41c5-9c80-7b38be67e743	0	0.0
db44ca4e-638f-4f54-bb87-905295f60ec4	0	0.0
df710881-b578-48bf-92ef-b785d21340ca	0	0.0
e188310b-58a2-4dc8-a063-bc3cf7910619	0	0.0
e1ce8fa9-2900-4961-94c9-da97ce2d5b7f	0	0.0
e2d03205-d55a-44de-a1d6-fc918d248b01	0	0.0
e6d55c2b-f54b-4d4c-a93e-2d978f57ad4b	0	0.0
e8001d61-9fad-46e0-b1f0-84551540eb61	0	0.0
f31bc6d0-71e1-4a84-9f23-25f3bc7e71ed	0	0.0
f50cea78-2214-43d9-bf72-931d352eeedb	0	0.0
f59dd8c8-0d62-44b6-b84a-6e67076e7f0b	0	0.0
f5e50380-3507-4002-9bfe-624bc0a3eba1	0	0.0
f7d0230a-eae0-4c64-9c45-e0bbff3dcbe4	0	0.0
f98dc110-abd1-4cb8-bf70-022f4c5a36bc	0	0.0
f9da0d15-5051-4507-b6c0-0e86c317539e	0	0.0
fb5fcf05-c7e4-450b-9ea8-3d1e5c031d2e	0	0.0
fc27bb25-5588-408c-ac7f-d6ac942aa131	0	0.0
fd08169b-d14b-4f73-858e-6152cd40fba3	0	0.0
ffb57dee-ba76-4251-87cb-e024a995371c	0	0.0
0097539b-b0a9-423d-9cda-b696195a1a20	1	398934048223
0280b3ee-98fa-476f-a924-de4d4ad5d3b9	1	225876298393
0ea2d656-d880-425b-abe7-d1cab827aaf5	1	196575478251
147fe9a0-534d-4267-9709-3878a648c755	1	249333780139
14a248c3-0189-424d-8be1-8d8b39c705f0	1	290721168746
15493bfe-06ff-4b95-beb1-92e511920cb4	1	259490609554
18225f58-2ba3-4e5c-b1f8-79c02bb816c6	1	344929875756
18ac8907-2d00-441f-82ec-2255814e3f5c	1	219322342213
1db01a3d-953a-4b7b-b20c-a1757fb44ae1	1	384748862875
2737e691-0359-441c-871d-e472b0fba0e0	1	309669475833
27b74fa9-f4d1-44af-b6f4-29605ffc5701	1	25365748731
3488851e-c137-47db-9562-8a035d838af5	1	228291738579
372c0939-f982-481d-b0a8-691eddf5e154	1	410972640729
3a17bd2e-3eb5-471f-b3b1-396f78bb08f7	1	382883865963
3a55c873-bda1-4c1f-89fb-89925e08008c	1	847748232339
3c79dcc6-cf47-44b7-88a1-561fb66c68a0	1	250937785873
40096c84-0ef0-4d51-a862-f74ca9c509bb	1	273341782328
43142de2-5080-4546-8235-b4706b212ae3	1	260345885129
52999b05-3015-4ca2-91ad-33aa978b407e	1	90791886837
544bab92-1166-49d7-81d1-4ff4cdfc6593	1	342722384416
5cc8ca38-b2f9-4958-b276-e3eabe6e01f6	1	239052558215
5d1a16dd-6c0c-4130-acd3-0573da2dc70c	1	189206399301
5f977cf2-9f80-4df2-a5de-4c964adcd404	1	844124408744
60617dd3-dd93-4b82-a87a-f7c89defcbca	1	358064104933
60d19fd5-f7dd-4421-b03d-414b31c46daa	1	281700932768
60e2f110-6b5a-4495-8ed7-15236fb2a58a	1	253738970601
670768c3-4ca7-4e06-816f-8fc7c0b4a80c	1	592121001111
69057d67-b8fb-4e41-8961-ed1864ba3a4b	1	349818164518
6a81a67c-8817-4324-a773-996745aefdb5	1	252542375664
70e40955-48a5-4dc9-b617-44c4581989bd	1	224225226168
71e90570-c4d4-4c7f-b6af-b6fb338fde70	1	400755664882
763d2544-5f2f-4bbf-9e5e-70525fa1d2f5	1	205499685329
7b1b9628-1a27-4b0a-a34f-59a7178fc307	1	312579903238
7b8efa91-179f-44e1-9019-a3361b81a020	1	471927955478
7fb187b1-9a6c-46bb-bceb-4a160264d912	1	245536032167
83436e39-a06f-46f0-9450-d8667f1c7683	1	193091588457
867623c6-6379-44cc-93a2-f0332e62f3c4	1	260195805149
8a4c34c7-f42b-48e3-bddb-16229097b2a9	1	378118437282
8c292c20-7f4b-4fcc-8c13-90886ab4b257	1	180237174097
9312ae7a-9c12-4703-bc84-ae28bc230fe4	1	286399352967
962dc993-d972-4d59-a335-30759ba25e7e	1	498982574531
970a3005-f668-494b-99c6-08b56692aaf5	1	214687617172
a0663a73-caaf-4fac-ba78-967ba0f5e1d3	1	204966439308
a07d8ca0-ae1c-41c7-852c-0446b7a84df9	1	247168713285
a6e103f3-c0e2-4673-95ed-35bf7114ba9d	1	549297229125
a7d1eaae-1874-434f-8c97-fa98f41b8e60	1	353260024813
a861c037-da5e-480a-a006-d2747114b1dc	1	287991765739
ab0c5b41-c6d6-4591-a11e-9255705d0d6b	1	199769705484
acabdb00-fd4b-4a95-9326-140ce8541760	1	281927158198
b4ed22c6-9b45-4b3e-bf91-50bf28423b62	1	294295609345
b56816e8-6580-4402-b67e-c4400923a6d7	1	256707642341
bf1213f6-7956-47a8-a7d1-881d9d83971d	1	323725170279
c06751c4-ac35-4da4-a86d-36b245de9c16	1	248940881022
c288e63d-f096-4313-bd45-6704954ea7ba	1	302581656955
c4f04946-d3e7-4f18-87b3-ea8ab5dbc82c	1	60527924558
c7fb0cbb-3633-4439-8df8-fa84382134a8	1	249806899267
c82e36c0-668a-4940-b400-986b6e2f47b7	1	312610830308
c92efe73-3258-44e8-aaa1-628ed1ca937d	1	206561039613
c9fa132c-146a-41ca-a2f7-79227edaa9ce	1	283724646366
cdd88df9-4bd9-40a3-a701-8ea37005e04b	1	143414173752
d0adbb71-41e9-4b14-b96d-c52d16156fa0	1	327381376223
d6df55ba-8285-497f-a8cb-96d85bb44fcc	1	22941894147
dce4f9da-a55d-4e45-b014-1e67684a4ffb	1	308791796514
e265b57f-ea33-4fed-9fa5-3706d7f6abf0	1	238799611664
e53a7c37-bd31-42a3-84fd-14fed7c6bf44	1	286088162072
f1fa9376-d440-475d-86ac-b9ad1eb22f4f	1	220424003204
f312872c-154a-4bd6-aa62-7ba6678bbb13	1	274195753009
f5a26082-9428-4cfc-be1a-e987f7906e49	1	31979328562
f807dc9d-d1aa-4e73-bffc-c98193597838	1	24972792143
06248732-ba85-4870-80b6-14dacb536627	2	383092775014
091bc3bd-8a0d-4579-9ff5-2c0be4b8e261	2	669965577169
09c38ee5-b39e-47b2-8f27-8f125affa7f6	2	391713074873
176fb648-e391-42ea-a50e-e5e6a3926b50	2	737611220247
21cc3b09-799a-4e71-afa8-f80496b761e3	2	480906797858
23616216-35d2-4ccd-86e7-e4c24662c642	2	384772290316
24bc6017-0bad-4400-bc56-49a9d7e644df	2	431899072097
253560ae-d7c5-4f89-9283-328913159c7a	2	49445346822
2d0c3db1-8ab4-4197-b034-19cbe6494852	2	668618698958
39987d4a-03d0-4d74-9b03-9ba318c0a2b1	2	716128209866
3c46808e-9330-4d25-9424-45da6154fed6	2	536063397002
4cb92a66-9f3c-4b86-a6e0-0244d26e1985	2	397353664331
4ea02aac-13df-4d8c-8f64-d1ee1c338e04	2	387485609753
5092fe52-3d20-476a-859e-4e33f322eb41	2	487135008006
5280acda-9a1d-4feb-b6ae-1234cb6dabdf	2	521551281269
53b97b27-881d-4a39-9b19-4cbe8cdc256a	2	44513351112
53db1847-ad1e-43d3-99a2-f6244679cc50	2	74924298362
559db677-cb27-4001-8687-b214da8ebb9b	2	632164398145
55c5dbf1-165f-4157-8313-39546369cabf	2	607198551346
5a3f204b-c5b3-44a7-b7b7-bea849c159ff	2	509935064869
5d27bcee-a163-4f7f-aa71-a608f4460493	2	654491488747
5e227f77-9343-4551-8197-188cc815ae80	2	855321511079
5f27cd2c-89aa-4c03-9967-dae81c64d088	2	567449292731
64f89a5a-9f74-4751-9740-e6858617da7f	2	439988533899
6f9aaea7-dd2e-4baf-9fd1-00c8ff4b23ba	2	541576561866
7b4606fa-ebd0-4c93-8b3d-1c3c1504c6ff	2	692050741852
7ecf18f3-7a8c-4176-b78b-7df60d6330f3	2	472987673941
7f3b65a3-ad59-49f1-92fa-72793435f86e	2	37859417194
83d95d1d-c130-4ef4-af98-3143c8b12dbf	2	446265206487
8a50a07c-3837-4f7f-aeb2-aa7d5d38f2eb	2	103253518364
935132e7-8ba2-4794-a14e-00d60dc28451	2	475586311722
9670c27f-7043-4dd2-be9b-7969d0ea78d2	2	696397985878
9bceb1fe-7431-41cb-9d54-eda8ec7e6edb	2	481860250408
a4a2ec43-60ae-4d6a-8edc-fb247f2d3b76	2	794257833566
a95b1bb4-5428-418c-8677-2293808aeb2a	2	572176324145
af2da8cd-d6d2-4a95-acaf-1330e8f63b52	2	442081665304
b3113d8e-5469-460e-a143-e51d07c64e48	2	41870628968
b5ff963b-4926-4af3-bab3-26697fba9155	2	372765179557
b7ce107c-d523-4e92-ab0d-e27aa1f799e2	2	640429241295
bd913ca5-5a50-4fe1-b8d1-199c76d821fa	2	140549718057
becd2d19-b92c-4305-ade3-d2c357a1047b	2	403932199173
c1459cbf-7d8f-43b8-a69c-bc824454929e	2	50927750837
c2827d52-b38d-4004-8730-d3769b891187	2	551646907364
c406c657-3d56-474a-bcb6-d2abd7ef2588	2	824626820286
ca05e72f-65c8-400c-aec6-c5225e20d3e7	2	723341955569
d4045310-7565-438e-875f-2d38eb8c7d3f	2	639069106377
d87d0953-d2e5-41cc-b990-be54539779be	2	485488270118
dabe230e-b7bb-469c-8d6c-0aa5dc9fcd8d	2	453178092646
dc3d680b-44a2-4d18-8b36-f2ea80342656	2	720373383932
dc9a90f9-cfee-4e75-b1b4-ace36b09ea16	2	615178672494
dd1c79a4-c58a-45a0-8285-9b1e4d82a5b2	2	751291799293
dfa5f4a6-d885-4e83-a33b-8b381a2d6204	2	828193358303
e36c2135-0868-4b17-b6e8-1c562ce636a4	2	711692231541
e7297511-a7dd-4712-86d6-5a1236cb9b95	2	75668965679
e92a5d1a-e928-4cc0-95b2-ac616521fa88	2	614281649058
ebffc68e-1c01-4c13-8519-50d1dd9c6120	2	645598214534
ece7fc7c-b3f3-42fc-8772-28a0e46b2b41	2	571348582627
efdd0420-eff3-4b0b-b95b-9b7e704bec1f	2	557093830896
f100b7a6-e9c2-4263-8800-55731ea37632	2	748355675492
f7af0b8a-cbd3-4246-8b24-fb081450e6fd	2	470732667152
f87e979d-2869-4742-84aa-30fd103a73fe	2	347375917973
043e5916-898f-4ab9-8ee1-22f814414004	3	676854683361
0868689e-4a20-445c-9a83-df1cbb8f6eab	3	886271433921
0a4893c6-92fc-49d1-9747-e99b7f5326a3	3	125845366248
0bb9cd35-d245-4fe6-b720-0b827505b6e2	3	794923933729
107fffa5-abb2-47c9-93a1-69a2d07a8073	3	73211346148
14eac3ae-c3e9-4f52-94c7-0097f0234a82	3	313448180747
175f3b18-77d1-4532-90c8-b6d7ad198363	3	680157361207
21c512f3-caf9-4854-86ec-93241d529ca0	3	170633177062
30ff21ce-3955-4a43-85fa-15dc6c60d8f8	3	567211596301
351f5723-7a2b-487e-8c1c-4c627afd2141	3	127641704629
4060cf60-a8c9-4cb1-b096-97c9c556b26e	3	632417466359
4d7c2b0e-f62b-4893-9d88-70a83688e1cf	3	913959404665
6bd64fe0-d720-498c-98ef-5f4fed1c628d	3	794990605199
71d0b85c-4b4e-45b8-af0c-ca264d05df4c	3	716778053976
749efeb5-db08-4ccd-8cd6-767ca80c85a8	3	850562902529
79bf01d6-fd5e-490a-866f-26a50127ffa9	3	131229032061
7cdd7a9b-bcd9-46c7-8a2a-5805a8927cd5	3	835861815325
82db5c6f-81a0-4d09-b8a7-a2498874f3be	3	121771235686
82e003fc-e52b-4059-ad8d-b973fb5433f8	3	749183764289
836cabb0-9afc-4096-9b3e-da10bb9ea804	3	775732300989
94af5269-0437-4651-a3ea-dbbf2efdc777	3	778983644459
9e61ea7d-8a7c-49f7-8a55-290e7bfe0380	3	982449521744
a2f78fab-9884-4776-80dd-48795e1a6b24	3	932940254506
aeabc5e2-27d2-4bcc-84ae-84cc60beeec0	3	609482573674
afb77eb0-040c-4d6a-a920-8a9f207a8695	3	115890365397
b0818aec-02d1-4921-b915-45c3ad72f417	3	841800442787
b0ca67d9-b6c5-47b6-8ad1-045e05bc96aa	3	616980601821
b2cde560-9b2f-4dd3-8251-fab30d49566b	3	660949235463
b56394f1-3892-4dec-87b1-1a40aa15a6dd	3	759326522934
b5e38453-763a-44cb-a328-13b322e0b6b4	3	722294672391
b95fdfeb-6d9e-4bfc-8eb9-02b76d644c71	3	860445986364
be28a9d0-f392-416c-be7c-1e4a5b96f68c	3	121164169574
c8f587c1-595c-4617-9f03-8a7eedc43910	3	25262987702
d44b4a3f-80d6-4648-a515-dc58438bbe13	3	138415201311
d45139de-f2a0-4895-9602-20db5dc604c4	3	601324175968
db006b3d-fe93-4453-a51e-d78d5c670f9f	3	799753036262
e33a9800-8c1e-4164-b631-a07be0c39cbc	3	77238208815
e5200a32-96d2-4dea-b78f-e0638e7b57de	3	891942503602
ed7e3d85-3fc4-4fbe-8feb-13ad31e8cf70	3	826028146909
f1d3adba-2220-49eb-989c-391d22e378f2	3	828555330925
ffe2a523-ea55-407c-a5ca-52d3a184f232	3	801646903398
01ed42c5-175d-4de0-a379-417f950113f6	4	141938798829
0764ef9f-226c-4cbc-b0d7-79c47f215d74	4	893603241724
0776df15-e66e-4978-a585-0f0416fa6880	4	111645147065
1317e4d4-2c33-494b-bb77-aa9997327a41	4	112610092201
2a8012b9-2405-4f23-819f-ba1be239d009	4	148283827851
3aabd300-ffc2-46dd-81ff-492c6bcee361	4	124797379754
44df188d-5dd0-488b-9a21-e9ce57f35077	4	885402175123
5a9910f9-71b4-45fa-bd9a-09538ad02a7f	4	921422473586
66e4b684-15cd-44fd-9344-67cf1f54b949	4	772555208002
6e37f15c-f206-4f46-8fde-458c9d27bf1e	4	71527707554
773a95de-b12e-4746-914d-dc6463585d05	4	885092138645
7d9d7da1-db09-4104-bf70-2424184fff38	4	872143444049
84492608-6c8f-4a40-a057-4fba4614fdfa	4	116718051789
9a5706d7-435a-46e5-8099-5c908c9f6a72	4	895566230705
9d146f01-0ffb-4e15-a87a-f4f4b579d143	4	137491630197
ae43e7b6-18c7-4657-909a-462e102153fb	4	129916022283
b032fc61-5872-48a1-9d77-5343d3da6525	4	135953427794
b3d4ce62-1ef3-4411-9ed0-924191070139	4	850028964737
b6210d2c-2c94-4b86-925d-a15ee151487b	4	112569971032
bf152db9-25c5-42b4-a96d-92e282099a0f	4	191285464624
ce216458-2523-4252-a95f-0251ce14723e	4	143436961159
dac1a5c3-91e1-496a-8a02-f7760fb4241c	4	108324596278
e5a8c9ba-b525-4aa3-9f98-4b4156ff9901	4	128698886433
e6b85402-c38e-4c9d-bd5e-a00f20c88ff2	4	881942124753
efb7b03d-e283-47be-9233-edf945abb012	4	832174270607
fc480cc8-6c95-49d1-982c-98d20b57217a	4	141763664024
fc66f17a-2f6c-4dd9-8d9b-efd4baaca2af	4	135023831706
1212a484-922a-4038-81a3-eacc506da847	5	121446712097
1b82b231-0151-46e3-9e71-3c2ceb78d051	5	141102074934
2daf968e-55ba-42e4-a420-25a691604027	5	18360981299
32860e74-cf2c-4537-b4cb-83e62cf0a4db	5	21236440798
34443851-8f41-46bd-b63b-d522bf8a2f40	5	14972787707
510293b0-9812-443f-9ffe-3c3ce78528f6	5	106900719378
53f74076-94a8-425d-bf61-71f90fabd2cc	5	114951526665
7e3eb4a6-fc8e-4ae7-ab52-50f85390f78b	5	153555485125
8b024b8a-d726-4abc-a81b-4a6f316a4575	5	129490068112
8d6fe4ac-a51e-4558-909d-1df555934c12	5	820280819858
9a8e4d3a-cbe1-435f-b0f9-02238a3236c6	5	10527647814
a861ca1b-075a-4c28-8f86-24d9bfe520f5	5	14015071247
b3edef4e-d42d-4933-8c5f-51269423687f	5	103558101014
b93a691d-6fee-4db4-b78b-61ebd0817d9a	5	167865139833
c79e2e9a-9749-4b7f-9ef4-0b893d818b73	5	976377522227
efce5bc7-aed2-4f3a-9574-fe59b655f57e	5	192773499813
f0e2e252-00d1-4a1a-8342-7140b8aa676c	5	133800188953
2f8cace5-4791-4dff-9314-5997b012b1cd	6	162556559523
501305ad-7e26-4d47-9f95-58273208e921	6	139556433831
5ba370c6-6456-4b48-a0bd-f2976dce0262	6	145311558881
6017c75f-8410-410b-91fc-54035008c1d9	6	135953427794
afc60bb6-6efc-4174-ade2-d148223ddf4b	6	162208830081
b58a2839-3089-4164-b66c-9b51873f25f8	6	149553060678
b8fbeb3a-9dd2-41b5-a9f2-7832a9fda3f4	6	205789687056
ba6104b9-133d-478a-ac0d-5c0a4cafad88	6	185583416266
c8696c52-d14d-4fad-92f7-5e0e66d4de06	6	123107643169
cf004694-2c63-4b88-8058-214578f369ea	6	149458735191
e59a27c7-5db4-4046-9d59-b10ce97c4518	6	142375861596
f9e903c4-2d69-44d2-934d-599e03d65409	6	228099458207
ffdf6fbf-5bee-49f7-8126-414651f3a317	6	159815764387
01f7a9ce-6667-438c-944b-f40f7c66b5f9	7	155271718853
3ec758aa-c145-4b2c-a847-77dbf1d01c4c	7	215228723565
419ffb86-9d3b-4564-a2b8-c563e542d11d	7	159493067235
69b4feb7-1adc-489f-87a9-1295207cc7a8	7	237535212474
750ae6fb-2511-46cb-966d-c71b86fe6f22	7	132246493862
c5d8fc6f-2f81-41b4-8271-78d92e23f77f	7	512915204858
23808c79-c71b-476c-85e0-34394edd1fe8	8	323269744154
e15a011d-bba3-4807-bf48-dfa912d018af	8	240179221735
e7b40048-f3f9-4887-83ca-ccba24ae9f83	8	138516337656
e801e7b4-a386-4452-a1c7-5a25d126e077	8	264730428314
2025115f-5054-49e7-a9e1-9bcd4c6152a6	9	290786572833
2243d710-52c2-4902-b11c-78ee6024924a	9	357101832944
52e0e5b5-216f-48fb-816c-133e57cfff6b	9	201331201907
d2c53d67-fd5a-4b3f-ae58-b2a4b5922486	9	274399488153
d62751ca-d171-4e69-8696-af61ed209647	9	26828964013
040c3d49-addc-44eb-8b97-acdd4cc0a4a7	10	220470145972
29186088-af3e-4fb0-a547-34a45e19673e	10	390647584313
8aaa76ec-dd68-412a-915a-ef12478a86dd	10	319276239079
a59f1d5e-2ae8-49cb-a77e-ba53a7ea15c3	10	281776300894
ad087113-94ea-47bb-9fec-1b5273391037	10	273602152921
c72c44df-8109-4088-b763-6c4ec474e375	10	271813288191
d8b37f77-500a-4c1e-b344-41f4e0c6fea6	11	270278670824
0772afa9-32f8-404f-a0cb-439bd320e8f6	12	265881430176
e49b0cc5-3b8f-488d-8914-a8e0c761abf5	12	12362142792
1e46ba47-0a66-4f70-b508-c619c6129e33	13	298417971557
01411772-3c6a-494e-9a61-7e96812b785a	14	303636787939
d93b5ec2-a908-43e6-9c27-82b490cfbd9d	14	455642843706
7870577f-3197-4590-b036-aaeb643ccc84	15	402184020103
9bef6ea0-d0ac-4552-863e-9bba7c91b6a6	15	506339368899
317f72b2-51cd-496a-bdb2-d23c4e4c5aa6	17	450797148575
9c2a33fb-dcf0-469a-97d8-9352158143df	17	338069487996
11606737-57d8-4fb0-87a1-1035a2aab959	19	100521760845
f4f05d0e-51a1-4299-a6a4-b834a356efdb	19	366493257489
be01999b-2ef2-4929-91b1-bfaa6260b6ff	21	531656337344
5e422c8a-d785-4e68-b43d-d3697e1e4ab4	22	518772061814
747eeaa9-3782-4ef3-8359-daefa8afb3c0	23	562677709828
3809d8ed-320f-4a1e-a2a3-74210d53cd74	37	819341417797
f60b4be3-9340-4e44-9e5b-f840a1bd9f9c	4358	104693980312

## Sheet: NTRK3 expr Colorectal Cancer
Supplementary Table S3. Expression of exons of NTRK3 in TCGA colorectal cancer data.
	NTRK3 exons
dataset	2	3	4	5	6	7	8	9	10	11	12	13	14	15	16	17	18	19
unc.edu.d337a363-b61e-4ae2-b8e6-27a4c67c18a5.1756158.bt.exon_quantification.txt	0	0	0	0	0	0	0	0	0	0	0	0	0	0	0	0	0	0
unc.edu.77b6d9b6-8413-4cd2-b0ff-c866aef4aaa7.1756579.bt.exon_quantification.txt	0	0	0	0	0	0	0.590011	0.297083	0.14204	0	0	0	0	0	0	0	0	0
unc.edu.92962fd5-2a14-4e63-ae3f-97cdb83934ab.2282780.bt.exon_quantification.txt	0	0	0	0	0	0	0	0	0	0	0	0	0	0	0.0432109	0	0	0
unc.edu.7c2ff08a-754f-4e76-9c9b-3ce02248d2e6.1744810.bt.exon_quantification.txt	0	0	0	0	0	0	0	0	0	0	0	0	0	0	0	0	0	0
unc.edu.e4eaae39-90e1-4900-af4c-f9211149a4f5.1804766.bt.exon_quantification.txt	0	0	0	0.112614	0	0.256588	0.226802	0	0.0819009	0	0.374224	0.708483	0.471905	0	0	0	0.0509949	0.089101
unc.edu.bdc32766-c722-43b9-946b-5204fd535f87.1804269.bt.exon_quantification.txt	0	0	0	0	0	0	0	0	0	0	0	0.144678	0.0788459	0	0	0	0.0937224	0.0409392
unc.edu.e35d643d-003d-4eed-88ce-65b7d4ba5a92.1783303.bt.exon_quantification.txt	0	0	0	0	0	0.0636024	0.070274	0	0	0	0	0	0	0	0	0	0	0.0552153
unc.edu.c613bc10-0db1-46eb-bc19-63773536ea6b.1756204.bt.exon_quantification.txt	0	0	0	0	0	0	0	0	0	0	0	0	0	0	0	0	0	0
unc.edu.3558d726-a24a-417e-bc54-4ea732a1c50c.1805605.bt.exon_quantification.txt	0	0	0	0	0	0	0	0	0	0	0	0	0	0	0	0	0	0
unc.edu.2fd204da-a117-4329-a2f3-41bc869b1ee1.1785265.bt.exon_quantification.txt	0.0622817	0.467794	0.366216	0.254317	0.132687	0.92713	0.51219	0.451323	0.277437	0	0.422557	0.177775	0.145324	0.0698886	0	0.0634324	0	0.100609
unc.edu.9d737cc8-0854-4559-ab65-b43485ddc035.1756874.bt.exon_quantification.txt	0	0	0	0	0	0	0	0	0	0	0	0	0.221473	0	0	0	0	0
unc.edu.cde3355b-7452-4c37-a39d-19caa96030d6.1756491.bt.exon_quantification.txt	0	0	0	0	0	0	0	0	0	0	0	0	0	0	0	0	0	0
unc.edu.5f6fb619-ac35-4806-88e7-0f5d90c64fd1.1951398.bt.exon_quantification.txt	0	0	0	0	0.0956694	0.0417797	0	0	0	0	0.101557	0	0	0	0	0	0	0.0362703
unc.edu.f387e5e5-1c1f-44f3-85a5-eb470b36d49a.1755397.bt.exon_quantification.txt	0	0	0	0	0	0	0	0	0	0	0	0	0	0	0	0	0	0
unc.edu.08f98061-6b1e-4059-b37a-fe45b1c8652b.2638724.bt.exon_quantification.txt	0	0	0	0	0	0	0	0	0	0	0	0	0	0	0	0	0	0
unc.edu.7da31566-c632-479e-93d1-01488621c12b.1783496.bt.exon_quantification.txt	0	0.0637594	0	0	0	0.055285	0	0.0615143	0.0588218	0	0	0.169612	0.0462171	0	0	0.0201733	0	0
unc.edu.ba28ba04-d709-48c8-bd20-2b036ef54e2c.1965786.bt.exon_quantification.txt	0	0.430972	0.688836	0.615032	0.855697	0.280268	0.722555	0.311847	0.273348	0	0.227089	0.50158	0.702894	0	0	0.0340895	0.0464175	0.162206
unc.edu.6ae1ebd8-5db8-4e98-84b0-14eb60538ff6.1752335.bt.exon_quantification.txt	0	0	0	0	0	0	0	0	0.125045	0	0	0	0	0	0	0	0	0
unc.edu.d57626ff-a552-4e9a-a54d-6fbad5be0a74.1875098.bt.exon_quantification.txt	0	0	0	0.131597	0	0	0	0	0.0638045	0	0.145769	0.18398	0.0501321	0	0	0	0	0.0520602
unc.edu.c229d778-b9e2-430e-a9b7-789174c347a2.1755390.bt.exon_quantification.txt	0	0	0	0	0	0	0	0	0	0	0	0	0	0	0	0	0	0
unc.edu.7b85aa25-8031-4d9b-a1f3-5d411133489f.1755393.bt.exon_quantification.txt	0	0	0	0.390471	0.407448	0	0	0	0	0	0	0.545901	0.297502	0	0	0	0	0
unc.edu.0931a992-b009-4174-8017-a96295f2f447.2256426.bt.exon_quantification.txt	0	0	0	0	0	0	0.0505273	0.0508831	0	0	0	0	0.0764593	0	0	0	0	0
unc.edu.3b40e36d-725c-4291-beed-3fd394238b98.1756216.bt.exon_quantification.txt	0	0	0	0	0	0	0	0	0	0	0	0.601352	0.327721	0	0	0	0	0
unc.edu.1eee1136-f567-482b-b64d-a4761e615170.1966277.bt.exon_quantification.txt	0	0.044094	0.080545	0	0.175098	0.2294	0.295707	0.0850827	0.0406793	0	0	0	0	0	0	0.0139512	0	0
unc.edu.1c399aa3-51e0-4ae4-9c9f-5d0433a3408d.2224252.bt.exon_quantification.txt	0	0	0	0	0.0790435	0	0	0	0.0183636	0	0	0.0529515	0.0577143	0	0	0	0	0
unc.edu.58746677-c72b-4f75-bf2b-d4428d58aec5.2449034.bt.exon_quantification.txt	0.0591619	0	0	0.120789	0.12604	0	0.304084	0.24498	0.0878464	0	0	0.0844349	0.138044	0	0	0.0401699	0	0
unc.edu.62a57095-75de-4282-86e7-16e71f24b874.1875099.bt.exon_quantification.txt	0	0.0925771	0	0.234872	0	0.0535151	0.118257	0	0.142346	0	0.260166	0.0820911	0.0894749	0	0	0	0	0.0464581
unc.edu.24be3a59-8143-4138-bc1a-942944061447.1783421.bt.exon_quantification.txt	0	0	0	0	0	0	0	0	0	0	0	0	0	0	0	0	0	0
unc.edu.254a13a2-1e25-46d5-a70e-805da1fed514.1951399.bt.exon_quantification.txt	0	0	0	0	0	0	0	0	0	0	0	0	0	0	0	0	0	0
unc.edu.5ad175e7-8649-4ccc-91a1-b10dc8cfa642.1861580.bt.exon_quantification.txt	0	0	0	0	0	0	0	0	0	0	0	0	0	0	0	0	0	0
unc.edu.1a381da2-9979-4e40-95c4-31860e32ac6c.2120529.bt.exon_quantification.txt	0	0	0	0	0.322269	0.140738	0	0.156596	0	0	0	0.215889	0.117654	0	0	0	0	0
unc.edu.16cdf5cd-439a-4b8a-b1b5-9887c910cdc1.2283732.bt.exon_quantification.txt	0	0.187315	0.0855407	0.0891049	0.464895	0.284233	0.269184	0.632519	0.388821	0	0.296102	0.311434	0.169724	0	0	0	0.121048	0.0705005
unc.edu.4e79360a-53a8-445e-b68a-7195b76addd5.1868526.bt.exon_quantification.txt	0	0	0	0	0	0.0519899	0.0574434	0.231392	0.110632	0	0.126376	0.0797516	0.0434625	0	0	0.0379418	0	0.0677012
unc.edu.2ff064bb-9e08-497e-a83a-7360cf80f62d.1754511.bt.exon_quantification.txt	0	0.156962	0	0.597329	0.6233	0	0	0	0	0	0	0	0	0	0	0	0	0
unc.edu.9276f521-eb07-4a11-a32a-f1f4e941ed7a.2148501.bt.exon_quantification.txt	0	0.046526	0	0.354114	0.369511	0.0806843	0.0891477	0.0448877	0.0429229	0	0.0980624	0	0	0	0	0.0147207	0	0.0700446
unc.edu.975fedf0-9bbe-4da1-a696-cb405c0397e9.1756492.bt.exon_quantification.txt	0	0.109726	0	0	0	0	0	0	0.101228	0	0	0	0	0	0	0	0	0
unc.edu.fd15315c-9915-4d4f-9bbc-90e7b9cd20ad.1865027.bt.exon_quantification.txt	0	0	0	0	0	0	0	0	0	0	0	0	0	0	0	0	0	0
unc.edu.47adb423-3e97-4d73-86ab-3daafc157f5f.2283652.bt.exon_quantification.txt	0	0.214552	0	0	0.106499	0	0.20555	0	0.0742263	0	0	0	0.0777608	0	0	0.0339418	0	0
unc.edu.736ff36f-dfda-4b29-90e5-3ee1503ca93b.1756880.bt.exon_quantification.txt	0	0.152439	0	0	0	0	0.292087	0.294144	0.140634	0	0	0	0	0	0	0	0	0
unc.edu.77290f8d-daef-415e-8e3f-3406f2ab190e.2446364.bt.exon_quantification.txt	0	0	0	0	0	0	0	0	0	0	0	0	0	0	0	0	0	0
unc.edu.e5564429-a34d-457a-a1be-face4ad57adc.1756832.bt.exon_quantification.txt	0	0	0	0	0	0	0	0	0	0	0	0	0	0	0	0	0	0
unc.edu.3adb2bd1-1df6-4f20-b3d0-6ecb410505ea.1802869.bt.exon_quantification.txt	0	0	0	0	0	0	0	0.0641182	0.0306558	0	0	0	0.0481734	0	0	0	0	0.0500263
unc.edu.df99cfd8-0e22-4c24-b8e6-038fb8a9c1b8.2122433.bt.exon_quantification.txt	0	0.0911358	0	0	0	0.0395114	0.043656	0.0879268	0.105098	0	0.0960432	0.181829	0.0330307	0	0.0360856	0	0	0.0343011
unc.edu.a2ce6ade-bf78-481f-a75f-22f731abc9ca.1783489.bt.exon_quantification.txt	0	0	0	0	0	0	0	0	0	0	0	0	0	0	0	0	0	0
unc.edu.b9437781-a608-4e94-83cd-0b4531e7f74b.1866829.bt.exon_quantification.txt	0	0	0	0	0	0.0553875	0.122395	0.123257	0.0883962	0	0	0	0	0	0	0	0	0
unc.edu.a61d1612-a1d5-4b92-99d2-6ed585ea497b.1753582.bt.exon_quantification.txt	0	0	0	0	0	0	0	0	0	0	0	0	0	0	0	0	0.233716	0
unc.edu.d848fe92-a3fc-43a1-98e7-43e31155f27e.1812217.bt.exon_quantification.txt	0	0.0687817	0	0	0	0	0.0658958	0	0	0	0	0	0	0	0	0	0	0
unc.edu.12ce64f2-7acc-4aa5-9c37-e6bedd37617e.1756468.bt.exon_quantification.txt	0	0	0	0	0.660388	0.576795	0	0	0	0	0	0	0	0	0	0	0	0
unc.edu.51364582-19a3-4d49-8a15-2f7f42860e39.1755408.bt.exon_quantification.txt	0	0	0	0	0.439561	0.19196	0.212096	0	0.10212	0	0	0	0.160475	0	0	0	0	0
unc.edu.4a01323f-408b-4e74-8686-ee6d4d076ee8.1753912.bt.exon_quantification.txt	0	0	0	0	0	0	0	0	0	0	0	0.681952	0	0	0	0	0	0
unc.edu.2e8e944a-3e30-4d37-8487-b6ffa206b7c1.1756059.bt.exon_quantification.txt	0	0	0	0	0	0	0	0	0	0	0	0	0	0	0	0	0	0
unc.edu.a323e90d-02b3-4f8f-8d70-f3ca2957e4d5.1813188.bt.exon_quantification.txt	0	0.245385	0	0.0848932	0.177168	0.309484	0.598408	1.03307	0.658566	0.764039	0.282107	0.652771	0.970208	0.0933177	0.0353313	0.0423486	0.0384422	0.134337
unc.edu.ce5ac357-df4c-4dc3-b899-55328a21dc18.1785247.bt.exon_quantification.txt	0.0686171	0.368128	0.672448	1.40093	1.31566	1.08528	1.19912	0.710332	0.33962	0	0.310361	0.783434	0.587058	0.0769978	0.0583047	0.0698849	0.126877	0.304818
unc.edu.278e7651-b5df-426c-b296-fe33d83fb5b3.2305528.bt.exon_quantification.txt	0	0.29755	0.271762	0.0707714	0.147697	0.161251	0.249432	0.143536	0.325977	0	0.156786	0.247356	0.242645	0.0388972	0.029454	0.023536	0.0640948	0.0139987
unc.edu.9bf56dfa-3615-443e-be90-66493694d51a.1756882.bt.exon_quantification.txt	0	0	0	0	0	0	0	0	0	0	0	0	0.209689	0	0	0	0	0
unc.edu.1b7c1662-b8ee-4e22-92f8-1e9eaff7b3ad.1756219.bt.exon_quantification.txt	0	0	0.968241	1.00858	0	0	0	0	0	0	0	0	0	0	0	0	0	0
unc.edu.6a28f690-8f66-4977-b2fc-cb976fa00976.1756614.bt.exon_quantification.txt	0	0	0	0	0	0	0	0	0	0	0	0	0	0	0	0	0	0
unc.edu.65313f08-b04d-4860-95a4-258670e5d185.1755414.bt.exon_quantification.txt	0	0	0	0	0	0	0	0.423859	0	0	0	0	0	0	0	0	0	0
unc.edu.29d330b6-fc7f-4c9d-8b9d-70a5183dc5fe.1753153.bt.exon_quantification.txt	0	0	0	0	0	0	0	0	0	0	0.411117	0.259443	0	0	0	0	0	0
unc.edu.a08a4bad-be55-45b1-b4a9-c447ecc3fbd5.1811843.bt.exon_quantification.txt	0	0	0	0	0	0.0762672	0	0.0848606	0.162292	0	0.185388	0	0	0	0	0	0	0
unc.edu.04ed97f2-3ea3-4e0a-b1d5-3743f2673ec8.1753926.bt.exon_quantification.txt	0	0	0	0	0	0	0	0	0	0	0	0	0	0	0	0	0	0
unc.edu.ea57dbc8-b1d0-41ba-8f73-729ef0a4147b.1869038.bt.exon_quantification.txt	0.10543	0.311095	1.03321	0.645759	0.449223	0.49045	0.162569	0.163713	0.287004	0	0.119217	0.526638	0.656009	0.118307	0.17917	0.0894816	0	0.0425775
unc.edu.b968551d-6bca-4ebb-b16c-b25132be0965.2217271.bt.exon_quantification.txt	0	0	0	0	0	0	0	0	0	0	0	0	0	0	0	0	0	0
unc.edu.97a8318f-f4a8-4eb6-9984-336d3ed77547.1753914.bt.exon_quantification.txt	0	0	0	0	0	0	0	0	0	0	0	0	0	0	0	0	0	0
unc.edu.5d039b16-7523-4200-b403-c665da8ff35e.1756487.bt.exon_quantification.txt	0	0	0	0	0	0	0.204556	0.205997	0	0	0	0	0	0	0	0	0	0
unc.edu.e4a881ab-362f-4ddc-a80f-2d4eb2a96258.1783579.bt.exon_quantification.txt	0	0	0	0	0.154275	0.0673734	0	0	0.0358417	0	0	0	0	0	0	0	0	0
unc.edu.afac17a3-d4bc-4fbd-bc8e-0847dffe8dd2.1752294.bt.exon_quantification.txt	0	0	0	0	0	0	0	0	0	0	0	0	0	0	0	0	0	0
unc.edu.ab83c3ff-29a1-422c-89fb-2c815de358cd.1802867.bt.exon_quantification.txt	0	0	0	0	0	0	0	0	0	0	0	0.0861848	0.140905	0	0	0	0	0
unc.edu.c4cf1805-5b53-4c99-acf4-9cf0fd813d88.1962827.bt.exon_quantification.txt	0	0.0329448	0	0	0	0.171396	0.12625	0.0635695	0.0911804	0	0	0	0.0955224	0	0	0	0	0.0495982
unc.edu.a8a42f43-f83c-45a6-afb7-59e95aa24e8f.2041369.bt.exon_quantification.txt	0	0	0	0	0	0.0418839	0.0462773	0	0.066845	0	0	0	0	0	0	0	0	0
unc.edu.91c21f37-ee2f-413e-a509-ea8ff975dad5.1869288.bt.exon_quantification.txt	0	0	0	0	0	0	0	0	0	0	0	0	0	0	0	0	0	0
unc.edu.d660ee4f-58f3-4fd9-997a-6a2d0eefa66f.1756163.bt.exon_quantification.txt	0	0	0	0	0	0	0	0	0.124331	0	0	0	0	0	0	0	0	0
unc.edu.5b7b69e2-7656-47f2-b00f-06db08188c74.2446431.bt.exon_quantification.txt	0	0	0	0	0	0	0	0	0	0	0.120873	0	0	0	0	0	0	0.0215845
unc.edu.756490d4-bc0a-449b-9766-144ee2800021.1978745.bt.exon_quantification.txt	0	0	0	0	0	0	0	0	0	0	0	0	0	0	0	0	0	0.0137068
unc.edu.3385c524-0048-4c86-9d65-98a95a941845.1754550.bt.exon_quantification.txt	0	0	0	0	0	0.208786	0	0.232311	0.333214	0	0.50751	0	0.698162	0	0	0	0	0
unc.edu.f73ac22f-0c9c-431e-b899-6ed331de3dec.1755394.bt.exon_quantification.txt	0	0	0	0	0	0	0	0	0	1.62696	0.600722	0	0	0	0	0	0	0
unc.edu.ada6b8cf-fdd9-4de9-8a4b-5e8fbaaf995d.1869498.bt.exon_quantification.txt	0	0.0811897	0	0	0	0.0469324	0.0518554	0.104441	0	0	0	0	0.078469	0	0	0.0171255	0	0
unc.edu.47888c0a-0fd8-4bc2-844a-dfea0ce21bed.1864485.bt.exon_quantification.txt	0.0719569	0.0772092	0	0	0	0	0	0	0	0	0	0.102696	0	0	0	0	0.133052	0
unc.edu.64b434c0-0692-4034-9561-698a4d34629d.1752331.bt.exon_quantification.txt	0	0	0	0	0	0	0	0	0	0	0	0	0.168619	0	0	0	0	0
unc.edu.4c006fb2-f1e6-4d7d-b6f5-bf28b46035c0.1756186.bt.exon_quantification.txt	0	0	0	0	0	0	0	0	0	0	0	0	0.151544	0	0	0	0	0
unc.edu.310820cc-fc05-45c6-8f04-a44db0828686.1755780.bt.exon_quantification.txt	0	0	0	0	0	0.456006	1.76344	1.26847	0.121295	0	0	0	0	0	0	0	0	0
unc.edu.712f8dd6-0b5f-49f1-8fd1-d220d1e174cd.1813494.bt.exon_quantification.txt	0	0.0672524	0	0	0	0	0	0	0	0	0	0	0	0	0	0	0	0
unc.edu.2f31b846-4424-438e-b169-c1989b288920.1802627.bt.exon_quantification.txt	0	0.0823684	0	0	0	0	0	0	0	0	0	0	0.119412	0	0	0	0	0
unc.edu.ee2d17da-c7dd-4240-a45f-23e52418be3a.1785251.bt.exon_quantification.txt	0	0.0969088	0	0.122931	0.513102	0.280095	0.0618951	0.124662	0.327815	0	0.408508	0.0859321	0.468307	0	0	0	0.0556667	0.0729478
unc.edu.bdbeb4d2-aa03-492f-b43c-8b1c49d5b0ee.1794195.bt.exon_quantification.txt	0	0.0384047	0	0	0	0.0666005	0	0	0	0	0	0	0.0556766	0	0	0	0	0
unc.edu.79017748-51ba-41b4-8beb-4fb4645c87f6.1755413.bt.exon_quantification.txt	0	0	0	0	0	0	0	0.24437	0.233674	0	0.533854	0	0	0	0	0	0	0
unc.edu.71f3246a-0b7f-447e-8d1a-951159eb458e.2462590.bt.exon_quantification.txt	0	0.0301166	0	0	0	0	0	0.0581122	0	0	0	0	0	0	0	0	0	0
unc.edu.75871924-05ce-4e57-8b04-74093b412822.1744761.bt.exon_quantification.txt	0	0	0	0	0	0	0	0	0	0	0	0	0	0	0	0	0	0
unc.edu.ceb8591f-6ef7-46f2-b140-12d27652ccfc.1755415.bt.exon_quantification.txt	0	0.126314	0	0	0	0	0	0	0	0	0	0	0	0	0	0	0	0
unc.edu.c809549e-bd06-4b47-a3ff-dd2dbb2dfd2c.1783382.bt.exon_quantification.txt	0	0	0.130557	0	0	0.0619733	0	0	0	0	0	0	0	0	0	0	0	0
unc.edu.11288911-ed89-4dfb-9850-01d3e5438b5d.1744818.bt.exon_quantification.txt	0	0	0	0	0	0	0	0	0	0	0	0	0	0	0	0	0	0
unc.edu.15907695-4f7d-4e7c-a4d3-ca016c72ebba.1744812.bt.exon_quantification.txt	0	0.0215839	0	0	0	0	0	0	0.0199124	0	0	0.0574174	0	0	0	0	0	0
unc.edu.a8d4eaf8-812e-4842-bc6d-dc7c1c07c271.2216772.bt.exon_quantification.txt	0	0.0290823	0.106247	0	0	0	0	0	0	0	0	0	0	0	0	0	0	0
unc.edu.559bc3f5-8d24-4740-942f-a2504739c917.1752290.bt.exon_quantification.txt	0	0	0	10.0011	0	4.55748	0	0	0	0	0	0	0	0	4.16232	1.66301	0	0
unc.edu.caf2f9a3-64ca-44a0-bb55-23f5f50ed6a9.1794097.bt.exon_quantification.txt	0	0.02899	0	0	0	0	0	0	0	0	0	0	0.0420278	0	0	0.0183447	0	0
unc.edu.7306af09-2f4d-43db-84d1-926c5f4e9d2a.1949512.bt.exon_quantification.txt	0	0	0	0.146617	0.152992	0	0	0	0.0710871	0	0	0	0.167563	0	0	0	0	0
unc.edu.5b345610-029c-40b8-b39a-7d6657a6866e.2283516.bt.exon_quantification.txt	0	0.0570695	0	0	0	0	0	0.0550601	0.05265	0	0	0.075908	0.0827357	0	0	0	0	0
unc.edu.33b33a7a-b049-4cb5-b72d-c5bdb334fe2a.1756612.bt.exon_quantification.txt	0.360842	0	0	0	0	0	0	0	0	0	0	0	0	0	0	0	0	0
unc.edu.e19e34f1-f609-4cfc-8500-c013c270e81b.2432232.bt.exon_quantification.txt	0	0	0	0	0	0	0	0	0.0255228	0	0	0	0.0401072	0.0578646	0	0	0.0476746	0.0416498
unc.edu.8875aad0-5dfd-4fad-b9ea-69fbb472845c.1805894.bt.exon_quantification.txt	0	0	0	0	0	0	0	0	0	0	0	0	0	0	0	0	0	0
unc.edu.9e8f4ed7-78c0-436a-9333-5fb281fda266.2224314.bt.exon_quantification.txt	0	0	0	0	0	0.0339789	0.0375431	0	0	0	0	0	0	0	0	0	0	0
unc.edu.ff72e5af-02df-4b5c-ac80-69551c78ac73.2256322.bt.exon_quantification.txt	0	0	0	0	0	0	0	0	0	0	0	0	0	0	0	0	0	0
unc.edu.e647189e-6d18-47ff-a7dd-2419407f51f9.2216981.bt.exon_quantification.txt	0	0.0522242	0.0953961	0.198742	0.311074	0.0905659	0	0.251926	0.12045	0	0.110072	0.0694632	0	0	0.0413567	0.0330472	0.0899963	0.0589674
unc.edu.8aa89c02-8881-43f5-8e5c-8ce31d1b760e.2305173.bt.exon_quantification.txt	0	0	0	0	0	0.0393271	0.217262	0.0875166	0.041843	0	0	0.120654	0.0986299	0	0	0.0287006	0	0
unc.edu.b84b00dc-8f6c-4fed-b820-62b7f38a5376.1812025.bt.exon_quantification.txt	0	0	0	0	0	0	0.074716	0.0752421	0	0	0	0	0	0	0	0	0	0
unc.edu.1dc3f8d9-c9fd-4178-a0d1-520fcf2a5ebe.1756887.bt.exon_quantification.txt	0	0	0	0	0	0	0	0	0.136478	0	0	0	0	0	0	0	0	0
unc.edu.f53cf9e2-dcf1-4b70-b266-284dcf11f492.1874871.bt.exon_quantification.txt	0	0.0584014	0	0	0	0	0.111902	0.169035	0.296333	0	0.246184	0.155359	0.0846666	0	0	0.0369561	0.100641	0.087923
unc.edu.433108d3-e458-46fb-ab93-93bb84dab99c.1756187.bt.exon_quantification.txt	0	0	0	0	0	0.264963	0	0	0.140957	0	0	0	0	0	0	0	0	0
unc.edu.74f9b9ce-bdf9-455c-bcf5-3ea44c25f633.1861705.bt.exon_quantification.txt	0.107275	0.086329	0.10513	0	0.114271	0.548936	0.716793	0.666314	0.212383	0	0.36391	0.153101	0.125154	0.0601887	0	0.0182095	0.0991788	0.0216613
unc.edu.e2e46f4c-b069-4c80-9ff0-ec6d45e14fb7.1803125.bt.exon_quantification.txt	0	0	0	0	0	0.048164	0.0532161	0.107182	0	0	0.117075	0	0.120792	0	0	0	0	0.0418127
unc.edu.61e7bd27-eded-4508-932a-dedef832192b.1744798.bt.exon_quantification.txt	0	0	0	0	0	0	0	0	0	0	0	0	0	0	0	0	0	0
unc.edu.66ea9a6e-0bfa-4eab-a96d-a8982d433d9c.2625247.bt.exon_quantification.txt	0	0	0.118364	0	0	0	0	0	0	0	0	0	0	0	0	0	0	0
unc.edu.cada672a-6826-4fa4-8e96-73c11844bfee.1862088.bt.exon_quantification.txt	0.0294823	0.0474515	0.115571	0	0	0.109719	0.151535	0.183123	0.175107	0	0.0666754	0.168307	0.160515	0	0	0.010009	0.0272572	0.0595316
unc.edu.1af1b06f-81ef-48ab-bb79-6efec1fda91f.1756608.bt.exon_quantification.txt	0	0	0	0	0	0	0	0	0	0	0	0	0	0	0	0	0	0
unc.edu.23d7ce5f-3da1-4613-9607-d64ab3798c53.2121381.bt.exon_quantification.txt	0	0.0410016	0	0	0	0	0	0	0.0378264	0	0	0	0	0	0	0.103782	0.0706568	0.0308638
unc.edu.56da8a36-15d0-4140-8164-4965945eb218.1785253.bt.exon_quantification.txt	0	0	0	0	0	0	0.0640285	0.0644795	0.0308286	0	0	0	0.0968898	0	0	0	0	0
unc.edu.607d699d-4971-4636-a704-950c5a9cc9a2.1756894.bt.exon_quantification.txt	0	0	0	0	0	0	0	0	0	0	0	0	0	0	0	0	0	0.114873
unc.edu.44dfb04b-bb65-43b6-98b3-b34fba958e37.2122399.bt.exon_quantification.txt	0	0	0	0	0	0.0458285	0	0	0	0	0	0.0703	0.153247	0	0	0	0	0
unc.edu.1cbc3e13-be23-4e97-9127-69eaf5dc87f5.2305171.bt.exon_quantification.txt	0.0471716	0.0506147	0.0924563	0.0963086	0.200992	0.131662	0.048491	0.0976651	0.0700426	0	0	0	0	0	0	0	0	0
unc.edu.322cb03d-69ba-4015-888f-330ced0b4600.1949967.bt.exon_quantification.txt	0	0.0302645	0.110566	0	0	0	0	0	0	0	0	0	0.0438755	0	0	0	0	0.091126
unc.edu.85dd63e4-f58f-401d-8a76-cabc67a06fa9.1783332.bt.exon_quantification.txt	0	0	0	0	0	0.0574781	0.190522	0	0.0917327	0	0	0	0	0	0	0	0	0
unc.edu.fc7a6327-762f-4e60-aaac-892366afd3dc.1755392.bt.exon_quantification.txt	0	0	0	0	0	0	0	0	0.0960823	0	0	0	0.150986	0	0	0	0	0
unc.edu.a57dad4d-e09e-4ad2-9db1-1fea79435706.1874895.bt.exon_quantification.txt	0.114666	0.83049	2.0227	1.63877	1.83216	2.34702	1.7681	1.9586	1.67424	1.40466	1.81525	1.47284	1.47154	0.128671	0.0487164	0.136248	0	0.0463073
unc.edu.3b71298e-c66e-475d-8288-b9f17bda152d.2216606.bt.exon_quantification.txt	0	0	0	0	0	0.109207	0.060331	0	0	0	0	0	0	0.0658575	0	0	0	0
unc.edu.e60b2b3b-cffb-408c-ae50-019b8debcd15.1755751.bt.exon_quantification.txt	0	0.125468	0.916755	0.477477	0	0.217584	0	0	0	0	0	0.33377	0.181896	0	0	0	0	0.0944459
unc.edu.812fa79e-d5a2-4efc-9e73-9f2e0f8d9ac9.1755772.bt.exon_quantification.txt	0	0	0	0	0	0	0	0	0	0	0	0	0	0	0	0	0	0
unc.edu.6b6d937b-c112-41d7-86ed-284bd580b425.2625329.bt.exon_quantification.txt	0	0	0	0	0	0	0	0	0	0	0	0	0	0	0	0	0	0
unc.edu.997e6b10-68ba-4ae5-bfd1-a6d74518e0a1.2224251.bt.exon_quantification.txt	0	0.0220286	0.0804777	0	0	0	0	0.0425058	0.101613	0	0	0	0	0	0	0	0	0
unc.edu.c1101cac-e120-44ea-aa0f-d70f7bf4f837.2217892.bt.exon_quantification.txt	0	0.102461	0.187163	0.389923	0.406876	0.222108	0.0490812	0.0988536	0.449002	0	0.323936	0.204425	0.222813	0.0535772	0	0.0324185	0	0.0385638
unc.edu.a14d258a-87c9-4c09-81ae-0e3d7d5afca0.1756884.bt.exon_quantification.txt	0	0	0	0	0	0	0	0.590524	0	0	0	0	0	0.320055	0.484708	0.0968296	0	0
unc.edu.9a966df0-da41-4dd8-856a-82b40056c0d1.1785257.bt.exon_quantification.txt	0.123454	0.0331163	0	0	0	0.114859	0.253815	0.127801	0.0916553	0	0	0.0880959	0.0480099	0	0.0524502	0.0209558	0	0
unc.edu.29e4210f-709c-457d-a570-7054ce29ef99.1802633.bt.exon_quantification.txt	0	0	0	0	0	0	0	0.066201	0	0	0	0	0.0994767	0	0	0	0	0
unc.edu.d6a97e51-7737-4ef4-82ff-f4e27a0bdd8e.2432237.bt.exon_quantification.txt	0.0464754	0.0748016	0	0.379549	0.396051	0.302678	0.286652	0.577342	0.39105	0	0.105106	0.331645	0.28918	0.104303	0.118472	0.047334	0.0429678	0.0563067
unc.edu.682139cf-a3bd-4caf-bddc-5b1f3250f8f0.1951395.bt.exon_quantification.txt	0	0	0	0	0	0	0	0	0	0	0	0	0	0	0	0	0	0
unc.edu.fdcb90a9-34f7-4349-8d5b-93f4830b4f82.1756875.bt.exon_quantification.txt	0	0	0	0	0	0	0	0	0	0	0	0	0	0	0	0	0	0
unc.edu.5693546f-76cc-460e-ae90-01d44f010cda.1805516.bt.exon_quantification.txt	0	0	0	0	0	0	0	0	0	0	0.10468	0	0	0	0	0	0	0
unc.edu.5fd05a9a-f767-443e-b91c-4b0d7eb81740.1874744.bt.exon_quantification.txt	0	0	0	0	0	0	0	0	0.0347946	0	0	0	0	0	0	0	0	0.0567802
unc.edu.798972e4-04d6-498b-9fe8-6ca7c2868da0.1785269.bt.exon_quantification.txt	0	0.14811	0	0	0	0.0513699	0.227033	0.057158	0.218625	0	0.249737	0.236401	0.0858883	0.0619576	0.0938317	0.0187447	0	0.11149
unc.edu.ab75168e-e0a3-46b9-a96f-49f383271b41.1756596.bt.exon_quantification.txt	0	0	0	0	0	0	0	0	0	0	0	0	0	0	0	0	0	0
unc.edu.1fd3cdf4-a6be-4d65-830c-828c3d1a1074.1756515.bt.exon_quantification.txt	0	0	0	0	0	0	0	0	0	0	0	0	0	0	0	0	0	0
unc.edu.9d0e5f4b-9121-417f-bfa7-6abbfcecc2c9.1783586.bt.exon_quantification.txt	0	0	0	0	0	0.0502089	0	0.0558663	0	0	0.122046	0	0.0419736	0	0	0.0366421	0	0
unc.edu.b10417c8-5074-4051-b6cf-3eb5eb532bf1.1752291.bt.exon_quantification.txt	0	0	0	0	0	0	0	0	0	0	0	0	0	0	0	0	0	0
unc.edu.aa4caf7c-acbf-4c7c-9efd-c55e48840614.1755404.bt.exon_quantification.txt	0	0	0	0	0	0	0	0	0.109361	0	0.499695	0.630683	0.171853	0	0	0	0.204278	0
unc.edu.153cb676-3f1f-4fc8-8a53-e27654454a09.1755405.bt.exon_quantification.txt	0	0	0	0	0	0	0.453668	0.228431	0.327649	0	0	0	0	0	0	0	0	0
unc.edu.699710f3-f0ca-4875-ba01-b1196e9afeeb.1753967.bt.exon_quantification.txt	0	0	0	0	0	0	0	0	0	0	0	0	0	0	0	0	0	0
unc.edu.ae6c345c-c825-4925-b597-816f4819894e.1756877.bt.exon_quantification.txt	0	0	0	0	0	0	0	0	0	0	0	0	0	0	0	0	0	0
unc.edu.05cebc11-0dce-482c-893e-5b279ec67a78.1802868.bt.exon_quantification.txt	0	0	0	0	0	0	0	0	0	0	0	0	0	0	0	0	0	0
unc.edu.4f48892e-ffbe-404a-86a0-a6d5335f07a1.1756603.bt.exon_quantification.txt	0	0	0	0	0	0	0.395473	0	0	0	0	0	0	0	0	0	0	0
unc.edu.f6c2138d-a76f-46ea-9b60-4d47f5dcf0fb.1756592.bt.exon_quantification.txt	0	0	0	0	0	0	0	0	0	0	0	0.388456	0.635095	0	0	0	0	0
unc.edu.cc94423e-9972-41f1-8c19-445567981b79.1756147.bt.exon_quantification.txt	0	0	0	0	0	0	0.34352	0.691879	0.330797	0	0	0	0.259912	0	0	0	0	0
unc.edu.b2a99408-7ba1-40d7-8338-dc8c07d65aef.2305530.bt.exon_quantification.txt	0	0.0437264	0.239621	0.0832017	0.0868191	0.0379147	0.125675	0.168747	0.221871	0	0	0.116321	0.221871	0	0	0.0691746	0.188381	0.115202
unc.edu.0d8e19e9-20fd-4b1a-98ea-2a7262b58c73.1785250.bt.exon_quantification.txt	0	0	0	0	0	0	0	0	0	0	0	0	0	0	0	0	0	0
unc.edu.8875aad0-5dfd-4fad-b9ea-69fbb472845c.1753964.bt.exon_quantification.txt	0	0	0	0	0	0	0	0	0	0	0	0	0	0	0	0	0	0
unc.edu.2caeddb8-47d4-4e53-bd70-17d5b2269462.1754951.bt.exon_quantification.txt	0	0	0	0	0	0	0	0	0.124335	3.07728	1.13623	0	0	0	0	0	0	0
unc.edu.fe4d5eca-9363-4fc5-8f9e-a28b32bb1bbf.1864850.bt.exon_quantification.txt	0	0	0	0	0	0	0	0	0	0	0	0	0	0	0	0	0	0
unc.edu.f9410d08-1525-4bf7-9c7c-939a2abe60ae.1811765.bt.exon_quantification.txt	0	0.100474	0	0	0	0.0871199	0	0	0.0463466	0	0	0	0	0	0	0	0	0.0756315
unc.edu.bac65746-cf47-4ad3-ae4c-e4d3d967059c.1756101.bt.exon_quantification.txt	0	0	0	0	0	0	0	0	0	0	0	0	0	0	0	0	0	0
unc.edu.5baa33a0-2764-46b7-b613-bc7036e6541d.1753580.bt.exon_quantification.txt	0	0	0	0	0	0	0	0	0	0	0	0	0	0	0	0	0	0
unc.edu.79f250ad-7fd9-4f38-b867-dee4c2f45072.1861884.bt.exon_quantification.txt	0.05156	0.165971	0.303173	0.105268	0	0.143911	0.371016	0.320253	0.459353	0.947415	0.816234	0.367928	0.401022	0	0	0.0175042	0.0476687	0
unc.edu.06825f9e-18a0-40ae-877c-7e01d4552283.2660503.bt.exon_quantification.txt	0	0	0	0	0	0.0450385	0.0497629	0	0	0	0	0	0	0	0	0	0	0
unc.edu.b4379a0c-74e3-4e5f-a790-b7a86acdaa44.1752028.bt.exon_quantification.txt	0	0	0	0	0	0.24009	0	0	0	0	0	0	0	0	0	0	0	0
unc.edu.48fc4364-a8c5-4571-982f-7564a7bf778e.1756516.bt.exon_quantification.txt	0	0	0	0	0	0	0	0	0	0	0	0	0.717954	0	0	0	0	0
unc.edu.d2580e75-3a28-443d-916e-d689f97d6962.1784026.bt.exon_quantification.txt	0	0	0	0	0	0	0	0.137526	0	0	0	0	0.0516634	0	0	0	0	0
unc.edu.d283ed4c-330c-41a9-accd-e73fc689d94a.1813066.bt.exon_quantification.txt	0	0.251395	0.262409	0	0	0.186842	0	0.0692981	0.0662648	0	0.15139	0	0.156196	0	0	0	0	0.0540677
unc.edu.b5c76f1d-1ded-40da-92df-06b7dc2f0e2c.1756871.bt.exon_quantification.txt	0	0	0	0	0	0	0	0	0	0	0	0	0	0	0	0	0	0.312651
unc.edu.412feaad-4ed9-48cc-9fb2-1a8515766d67.2623682.bt.exon_quantification.txt	0	0.0630531	0.115177	0	0.125192	0	0	0.0608329	0.0581702	0	0	0	0	0	0	0	0	0
unc.edu.d7632cab-ab0e-4a4c-a051-0bb8965918ff.2257786.bt.exon_quantification.txt	0	0	0	0	0	0	0	0	0.0274374	0	0	0	0	0	0	0	0	0
unc.edu.1606ec0c-34b0-4950-a004-79f7e19600e9.1864168.bt.exon_quantification.txt	0	0	0	0	0	0	0	0	0	0	0	0	0	0	0	0	0	0
unc.edu.29cf10cc-a176-45f5-a570-bba7b569d4f9.2120530.bt.exon_quantification.txt	0	0.0850726	0	0	0	0	0	0.164154	0.0784845	0	0	0	0	0	0	0	0	0.0640382
unc.edu.ca3a2e76-9000-490b-8816-a6eda2774d7b.1756184.bt.exon_quantification.txt	0	0	0	0	0	0	0	0	0	0	0	0	0	0	0	0	0	0
unc.edu.04c767c7-f458-4610-880f-1fc5424170fa.1785243.bt.exon_quantification.txt	0	0.203678	0.124018	0	0	0	0.130088	0	0	0	0	0	0.0492133	0	0	0	0	0
unc.edu.68ecb607-d2d8-452d-a58d-23c0831be131.1783671.bt.exon_quantification.txt	0	0.0604572	0.110435	0	0	0.0524218	0	0	0.0278877	0	0	0	0.0876469	0	0	0	0	0
unc.edu.697581bc-95f3-4745-be85-17e8d81a6e89.1860706.bt.exon_quantification.txt	0	0.230008	0.672236	0	0	0.239325	0.176286	0.266291	0.339513	0	0.581743	0.367119	0.33345	0	0.072858	0.0291095	0.158546	0.103883
unc.edu.ee1ed607-fb29-4475-9767-37a80ec7cdcd.1804153.bt.exon_quantification.txt	0	0	0	0	0.284588	0	0	0	0.0661164	0	0.302101	0.190646	0.207794	0	0	0	0	0.0539466
unc.edu.c428bc7d-84de-46e7-97ad-5994999e183e.1754521.bt.exon_quantification.txt	0	0	0	0	0	0	0	0	0	0	0	0.300855	0	0	0	0	0	0
unc.edu.e931ef71-b983-438e-8fce-d08b3d37fb61.1804875.bt.exon_quantification.txt	0	0.277571	0.304218	0.211262	0.220448	0.144407	0.0531849	0	0.128038	0.633787	0.234014	0.295357	0.442645	0	0.0439621	0	0	0.0417882
unc.edu.d7f5f29d-7f8c-4746-aa05-cf9803ee3e9e.1875320.bt.exon_quantification.txt	0	0.0757478	0.092244	0	0.100265	0.39408	0.193519	0	0.139764	0	0	0.067168	0.0732095	0	0	0	0	0.0760253
unc.edu.fbf405c9-b3de-4e77-b7c2-b97dc8e90e76.1744821.bt.exon_quantification.txt	0	0.0417098	0	0	0	0	0	0	0	0	0	0	0	0	0	0	0	0
unc.edu.675ed4f5-0060-4e84-81b7-31814e9c2fa5.2216977.bt.exon_quantification.txt	0	0.0288646	0	0	0	0.100112	0	0.167089	0.0532585	0	0	0.0767853	0.041846	0	0	0	0	0
unc.edu.32622f16-a0e4-497d-aa07-4532d28d6a62.1756899.bt.exon_quantification.txt	0	0	0	0	0	0	0	0	0	0	0	0	0	0	0	0	0	0
unc.edu.caa3723b-04fc-4269-9df3-227a3f131f10.1783268.bt.exon_quantification.txt	0	0	0	0	0	0	0	0	0	0	0	0	0	0	0	0	0	0
unc.edu.9c5da0ca-bc9f-4ed5-8303-385c415904ed.1756145.bt.exon_quantification.txt	0	0	0	0	0	0	0	0	0	0	0	0.423544	0.230821	0	0	0	0	0
unc.edu.c4356a34-5215-4703-9671-d7ce0d83cf9d.1756505.bt.exon_quantification.txt	0	0	0.539273	0	0	0	0	0.284827	0.13618	0	0	0	0.213997	0	0	0	0	0
unc.edu.0f849dcd-e50a-47a9-87e8-90687c2e9a9c.1864677.bt.exon_quantification.txt	0	0	0	0	0	0	0	0	0	0	0	0	0	0	0	0	0	0
unc.edu.a4bf07a3-893a-462a-bd60-821fab35608d.1805427.bt.exon_quantification.txt	0	0	0	0	0	0	0	0	0	0	0	0	0	0	0	0	0.0997849	0
unc.edu.0eb5967b-472f-446b-8b04-a6c7480b166a.1803039.bt.exon_quantification.txt	0	0.0652499	0	0	0	0	0	0.125905	0.120394	0	0.41258	0.347155	0.236488	0	0	0.0412898	0.112443	0.0491167
unc.edu.29845441-a5c0-4081-bb42-63c6ff483849.1875788.bt.exon_quantification.txt	0	0	0	0	0	0.0415698	0	0.0462537	0.0663436	0	0	0	0.0347514	0	0.0379654	0.0151686	0	0
unc.edu.276eaf0e-6da5-430a-8e6b-5dadc4fd24a6.1756607.bt.exon_quantification.txt	0	0	0	0	0	0	0	0	0.132983	0	0.607632	0.383457	0	0.301497	0	0	0.248403	0
unc.edu.72540fd3-40fd-44bb-8114-38b71afa16d0.1785299.bt.exon_quantification.txt	0	0	0	0	0.126745	0	0	0	0.0294459	0	0	0	0	0	0	0	0	0
unc.edu.16689efe-1dcc-46f8-9c81-c8d7d81306a6.2623460.bt.exon_quantification.txt	0	0	0	0	0	0	0.0905981	0.0912361	0.0872426	0	0.199316	0.125782	0	0	0	0	0	0
unc.edu.a149f07d-1a70-4819-a7ec-3faacf6c3516.1755398.bt.exon_quantification.txt	0.178271	0	0	0	0	0	0	0	0.0882349	0	0	0.50885	0.27731	0	0	0.0605214	0	0
unc.edu.23404035-b398-47bb-8d19-8345cb151471.2611926.bt.exon_quantification.txt	0	0.0939685	0	0	0.124383	0.0543193	0.240069	0.12088	0.0577943	0	0	0.0833248	0.0454098	0	0	0.0396418	0	0.0471564
unc.edu.7e7bd6d1-e7ee-472c-9c03-abcf2bff5688.1785267.bt.exon_quantification.txt	0	0.033186	0.121239	0	0	0	0	0	0.061232	0	0	0.0882811	0	0	0	0	0	0
unc.edu.4bc7994e-b96d-423a-90b6-28ed92581f38.1756133.bt.exon_quantification.txt	0	0	0	0.471436	0.491933	0	0	0	0	0	0	0	0.179595	0	0	0	0	0
unc.edu.580423c8-4aa9-4677-8d58-a09bc89bb11c.1864484.bt.exon_quantification.txt	0	0	0	0	0	0	0	0	0	0	0	0.107677	0.0586809	0	0	0	0	0
unc.edu.7aed54d8-79aa-45eb-8afc-ffc97f18232c.2305529.bt.exon_quantification.txt	0.0357707	0.0575725	0	0.0730318	0.0762071	0.166402	0.257399	0.222181	0.159342	0	0	0	0	0	0	0.0242877	0	0.0288917
unc.edu.5f664093-aa46-4016-bb6a-e45186f229eb.1756895.bt.exon_quantification.txt	0	0	0	0	0	0	0	0	0	0	0	0	0	0	0	0	0	0
unc.edu.e1921d3b-cb2c-4a65-8cd9-07268cc10903.1783591.bt.exon_quantification.txt	0	0.321042	0.319874	0.222135	0.579482	0.050613	0.27961	0.563159	0.188478	0	0.123029	0.465836	0.423114	0	0	0	0.251473	0.0659081
unc.edu.efa86085-aef8-4a13-8f60-678c69947c0a.1755801.bt.exon_quantification.txt	0	0	0	0	0	0	0	0	0.203977	1.26211	0.466008	0	0	0	0	0	0	0
unc.edu.f26b8f5b-d948-4d2c-a318-928e6f1f6d40.1861137.bt.exon_quantification.txt	0	0	0	0	0.125228	0.328128	0.422972	0.486801	0.0581866	0	0	0.0838904	0.0457181	0	0	0	0.0543441	0.0237382
unc.edu.2b45b813-3661-47fc-ad9e-cc495ca51d49.1755407.bt.exon_quantification.txt	0.181254	0	0.355258	0.37006	0	0	0	0	0	0	0	0.258683	0	0	0	0	0	0
unc.edu.79b022ed-6ef5-4140-9cd1-04c8af58a9df.1756126.bt.exon_quantification.txt	0	0	0	0	0	0	1.48988	2.0005	0.239117	0	0	0	0	0	0	0	0	0
unc.edu.7f81eab3-eb0b-4264-98ea-46e53cbaaa8e.1755752.bt.exon_quantification.txt	0	0	0	0.584025	0.609418	0	0	0	0	0	0	0.408251	0	0	0	0	0	0
unc.edu.f5e7f7ed-c286-4f65-b3ea-e7cd6fab03b2.1864679.bt.exon_quantification.txt	0	0	0	0	0	0	0	0	0	0	0	0	0.0477985	0	0	0	0	0
unc.edu.a52dfcb1-d586-4762-aacb-ffa9f9eb0ca8.1756602.bt.exon_quantification.txt	0	0	0	0	0	0	0	0	0	0	0	0	0	0	0	0	0	0
unc.edu.f9c8fe0e-124c-4099-b1bc-64f856deafeb.1864959.bt.exon_quantification.txt	0	0	0	0.114046	0	0	0	0.0578263	0.0276476	0	0	0	0.0434462	0	0	0	0	0
unc.edu.013e625d-9dec-4e92-8130-1e99fe7a86e0.2442457.bt.exon_quantification.txt	0	0.0492347	0	0	0	0	0	0	0	0	0	0	0	0	0	0	0	0
unc.edu.8f9bdd3c-3c62-486c-a64c-f408d58d6e30.2305507.bt.exon_quantification.txt	0	0.0249617	0.0911935	0	0.0991234	0	0	0	0.0460573	0	0	0	0.0723758	0	0	0	0	0
unc.edu.c2efab4d-b20e-4a90-aeb1-3dfe9a4662ea.1756215.bt.exon_quantification.txt	0	0.224574	0.410222	0	0.445893	0.194726	0	0	0.103591	1.28194	0.473333	0.597411	0	0	0.177842	0	0	0
unc.edu.26b0c513-5897-4611-b94f-d6fbc1c508e5.1951394.bt.exon_quantification.txt	0	0	0	0	0	0	0	0	0	0	0	0	0	0	0	0	0	0.020114
unc.edu.2b5f1f9b-6aff-490c-8cd3-67b6388b4112.1756588.bt.exon_quantification.txt	0	0	0	0	0	0	0	0	0.112092	0	0	0	0	0	0	0	0	0
unc.edu.1e909d80-d551-4f4e-be4d-822d9f0a8c8d.2041343.bt.exon_quantification.txt	0	0	0	0	0	0	0	0	0	0	0	0	0.0532627	0	0	0	0	0
unc.edu.f7fb5192-be86-40e7-b7dc-19896b0058b6.1951397.bt.exon_quantification.txt	0	0	0	0	0	0.0373545	0	0	0.0794884	0	0.0908002	0	0	0	0	0	0.0371196	0.0810716
unc.edu.c4bd435f-a171-401b-abc5-1d90b03e2d9b.1869557.bt.exon_quantification.txt	0.0459056	0.591076	0.899749	0.749791	0.586793	0.726063	0.566276	0.950439	0.613465	0	0.72672	0.327579	0.24993	0.154537	0.234039	0.233769	0.212205	0.185388
unc.edu.85dd63e4-f58f-401d-8a76-cabc67a06fa9.1753987.bt.exon_quantification.txt	0	0	0	0	0	0	0	0.50914	0.243427	0	0	0	0	0	0	0	0	0
unc.edu.06c5b3d6-24c7-4d53-8871-7a9b19377c20.1744802.bt.exon_quantification.txt	0	0	0	0	0	0	0	0	0.0217116	0	0	0.0626054	0.0341183	0	0	0	0	0
unc.edu.26845d5b-60cb-49f5-b9bc-d1655e13800f.1861533.bt.exon_quantification.txt	0	0	0	0	0	0	0	0	0.0370005	0	0	0	0	0	0	0	0	0.0603799
unc.edu.966a397b-871a-4604-b515-4b90779b5134.1795344.bt.exon_quantification.txt	0	0.0310658	0	0	0	0.0538736	0	0.119888	0.1433	0	0.130954	0.165282	0.0450372	0	0	0	0	0
unc.edu.3e24a094-75e7-4965-9299-2bfd09f9dac4.2282591.bt.exon_quantification.txt	0	0.0924355	0	0	0.0917657	0.200374	0.177114	0.0891807	0.0426386	0	0	0	0	0	0.0366002	0.0146232	0.0398228	0
unc.edu.f45cca58-c48d-4152-bb36-7e5ee0fe2f89.1756538.bt.exon_quantification.txt	0	0	0	0.508895	0.531021	0	0	0.258031	0.123369	0	0	0	0	0	0	0.08462	0	0
unc.edu.875f69a3-a0b2-45b4-a003-b449b25f32f1.1756486.bt.exon_quantification.txt	0	0	0	0	0	0	0	0	0	0	0	0	0	0	0	0	0	0
unc.edu.df2f08c6-d160-46af-aafa-f6c7886f3a92.1796541.bt.exon_quantification.txt	0	0	0	0	0	0	0	0	0.0889398	0	0	0	0.0465875	0	0	0	0	0
unc.edu.0cc201f9-d974-4441-b052-1fc4279131c8.1782109.bt.exon_quantification.txt	0	0	0	0	0	0	0	0	0.0411596	0	0	0	0	0	0	0	0	0
unc.edu.e4a168d2-b3ca-47c3-af94-93c4a6d90560.1803192.bt.exon_quantification.txt	0	0.0604418	0	0	0	0	0	0.0583136	0.111522	0	0	0	0	0	0.0478644	0	0.156236	0.136492
unc.edu.85eb9996-655c-44f8-abbf-fbc332cf75cf.1756113.bt.exon_quantification.txt	0	0.199897	0	0	0	0.346657	1.14906	0.385717	1.1065	2.28216	0.842643	0.531765	0	0	0	0	0	0.150472
unc.edu.43310315-1797-422f-82d9-04be6f16225a.1756180.bt.exon_quantification.txt	0	0	0	0	0.400809	0.175037	0.193397	0	0.186234	0	0	0	0	0	0	0	0	0
unc.edu.95f8c3eb-2072-4fa1-bcdf-3403580f1a0c.1785240.bt.exon_quantification.txt	0	0	0	0	0	0	0	0	0	0	0	0	0	0	0	0	0	0
unc.edu.75c8ccb7-9a13-4e28-9946-9a80e13ba160.1805125.bt.exon_quantification.txt	0	0	0	0	0	0	0.114147	0.11495	0	0	0	0.0792377	0.0431824	0	0	0	0	0
unc.edu.02425503-99c9-4a4e-841f-5b8b4de64148.1795343.bt.exon_quantification.txt	0	0.0349004	0	0	0	0	0.066872	0	0	0	0	0	0	0	0	0	0.0601427	0.0262711
unc.edu.0cae03e2-f9d7-42a6-9f78-16d177590270.1864680.bt.exon_quantification.txt	0.187129	0.602363	0.611287	1.01881	1.196	1.16067	1.09006	0.968588	0.771827	0	0.846397	1.69142	0.679208	0.209984	0.212007	0.0635287	0.115337	0.151142
unc.edu.c652af72-7b8a-4ea9-ab5c-1cf0e8cc9a95.1756183.bt.exon_quantification.txt	0	0	0	0	0	0	0	0	0	0	0	0	0	0.347462	0	0	0	0
unc.edu.15b4eaf4-b1c3-4d63-a0ad-ef64873f8f93.1869388.bt.exon_quantification.txt	0.0540084	0.173852	0	0	0	0.251242	0.166557	0.27955	0.320777	0	0.122142	0.30832	0.294046	0	0.137675	0.0366708	0.0998646	0.0218111
unc.edu.6bff2e04-5771-4e5e-a98e-b1e1e0cd1774.1804387.bt.exon_quantification.txt	0	0	0	0	0	0	0	0	0	0	0	0	0.0466225	0	0	0	0	0
unc.edu.52f53fa6-d8ec-46db-87f9-11af1282ed6e.1869046.bt.exon_quantification.txt	0	0	0	0	0	0	0.0676927	0.0681694	0.0325928	0	0	0	0	0	0	0	0	0.0265936
unc.edu.a274e308-43a2-4599-b931-86acd2c295f8.1756881.bt.exon_quantification.txt	0	0	0	0	0	0	0	0	0	0	0	0	0	0	0	0	0	0
unc.edu.b2e2c315-da03-4a82-82c5-06343b7e0ad3.2433631.bt.exon_quantification.txt	0	0	0	0	0	0.0754347	0	0	0.0601954	0	0.0916822	0	0.0630618	0	0	0.0275258	0	0
unc.edu.bdc1a526-c832-4104-b458-7c710357663e.1756531.bt.exon_quantification.txt	0	0.224306	1.2292	0.426804	0	0	0.214895	0	0	0	0	0	0	0	0	0	0	0
unc.edu.b404de5b-49c7-4ace-b423-6a46e6378d3e.1875101.bt.exon_quantification.txt	0	0.0290874	0.106266	0	0	0	0.0557339	0	0	0	0	0.0773782	0.0843381	0	0	0	0	0
unc.edu.a814507e-9cdd-4b06-bb06-12ea32e169c2.1756606.bt.exon_quantification.txt	0	0	0	0	0	0	0	0.254571	0	0	0	0	0.191265	0	0	0	0	0
unc.edu.bfb9ee8a-2743-43e5-80a0-bd0f3c6f4cf2.1965818.bt.exon_quantification.txt	0	0.155139	0.283388	0.0983985	0.205353	0.672598	0.693606	0.399138	0.28625	0	0.326986	0.137567	0.374852	0	0	0.0981713	0	0.0389269
unc.edu.3558d726-a24a-417e-bc54-4ea732a1c50c.1754001.bt.exon_quantification.txt	0	0	0	0	0	0	0	0	0	0	0	0	0	0	0	0	0	0
unc.edu.354e7bb8-0b64-40ad-ac20-af3dbacb8e16.1783905.bt.exon_quantification.txt	0	0.0251066	0	0.0955445	0	0	0	0	0.0463246	0	0	0	0.109194	0	0	0	0	0.0377978
unc.edu.3abdf882-6d1f-47ae-9eaa-781822e82954.1756464.bt.exon_quantification.txt	0	0	0	0	0	0	0	0	0	0	0	0	0	0	0	0	0	0
unc.edu.aefb693b-0af3-44fa-96b4-260964a33d45.1753991.bt.exon_quantification.txt	0	0	0	0	0	0.216698	0	0	0	0	0	0	0	0	0	0	0	0
unc.edu.cb38e7b1-bb8f-4377-a418-f5b2e89af864.1755419.bt.exon_quantification.txt	0.20168	0.108201	0	0	0	0	0	0	0	0	0	0	0	0	0	0	0	0
unc.edu.5e1e93f4-c5a1-4137-9ae2-4beff960b56e.1785264.bt.exon_quantification.txt	0	0.115607	0	0.109987	0	0.100241	0.221512	0.446144	0.239971	0	0	0.076884	0.209499	0	0	0	0	0.174045
unc.edu.1493b166-ffc2-4689-8b77-a8b972b6dbc0.1785260.bt.exon_quantification.txt	0.0691653	0.222642	0.135564	0	0	0.06435	0.1422	0.214802	0.136933	0.847275	0.31284	0.0987117	0.268976	0	0	0.0234811	0.0639453	0.0558643
unc.edu.1f6f9954-19da-47bd-89c2-b0701871575e.2638710.bt.exon_quantification.txt	0	0.171872	0.156976	0	0	0	0	0	0	0	0	0.457213	0.124584	0	0	0	0	0
unc.edu.4e92fe80-4985-4b69-bab6-aece3c61c695.1804872.bt.exon_quantification.txt	0	0	0	0	0	0.104915	0.11592	0.116736	0.0558134	0	0.127512	0	0.13156	0	0	0	0	0
unc.edu.6e44c625-95e1-4bd6-b504-a5dae5423d9e.1756570.bt.exon_quantification.txt	0	0	0	0	0	0	0	0	0	0	0	0	0	0	0	0	0	0
unc.edu.c6c4fe3a-44a1-426d-92e9-5156b1db2aa2.1752023.bt.exon_quantification.txt	0	0	0	0	0	0	0	0	0	0	0	0	0	0	0	0	0	0
unc.edu.cad5af5b-fae9-49a6-aef4-ca2da058a6a8.1756591.bt.exon_quantification.txt	0	0	0	0	0	0	0	0	0	0	0	0	0	0	0	0	0	0
unc.edu.d1bd0d22-fcf9-41c8-952b-1f99a95c2de8.1756621.bt.exon_quantification.txt	0	0	0	0	0	0	0	0	0	3.54008	1.30711	0	0.224767	0	0	0	0	0
unc.edu.a831e365-7d70-4a0b-9567-3b8cdc0fc0b0.1860521.bt.exon_quantification.txt	0	0.0770385	0	0	0	0.0667992	0	0.0743259	0.142145	0	0.162373	0	0.0558427	0	0	0	0	0.0869858
unc.edu.9f28ea30-c8b3-4664-8c65-750c452f5427.1756601.bt.exon_quantification.txt	0	0	0	0	0	0	0	0	0	0	0	0	0	0	0	0	0	0
unc.edu.b7f8e77d-8de7-41e6-889e-c6780a214543.1876820.bt.exon_quantification.txt	0	0	0	0	0	0	0	0	0	0	0	0	0	0	0	0	0	0
unc.edu.58b577ba-2193-4bfc-9363-c10652306ce6.1756188.bt.exon_quantification.txt	0	0	0	0	0	0	0	0	0	0	0	0	0	0	0	0	0	0
unc.edu.36e38aab-6d36-496d-bba6-5f4393c33e33.1949868.bt.exon_quantification.txt	0	0	0	0	0	0.0649102	0.0717189	0	0.0690627	0	0	0	0	0	0	0	0	0
unc.edu.724fedca-f875-401a-9b21-cbcd86002200.1861993.bt.exon_quantification.txt	0	0.523354	0.273141	0.189681	0.296892	0.56184	0.955037	1.2022	0.896674	1.70713	1.89097	1.06074	0.541946	0.0521261	0.118414	0.141932	0	0.0750387
unc.edu.62c2e824-9162-4e82-960c-15b6e61a92ea.1875319.bt.exon_quantification.txt	0	0	0	0	0	0	0	0	0	0	0	0.07058	0.115393	0	0	0.0335785	0	0
unc.edu.80d91e38-2d7b-47ea-b704-5d1cbd4a37b5.1756872.bt.exon_quantification.txt	0	0	0	0	0	0	0	0	0	0	0	0	0	0	0	0	0	0.130504
unc.edu.e65f71d8-1a24-403a-ab17-8a97ceeb18b1.1756108.bt.exon_quantification.txt	0	0	0	0	0	0.265933	0.293829	0	0	0	0	0	0	0	0	0	0	0
unc.edu.c479f86b-22b4-420d-9177-91551f60a907.1785241.bt.exon_quantification.txt	0	0	0	0	0	0	0	0	0	0	0	0	0	0	0	0	0	0.0489677
unc.edu.f6601de6-113d-491f-9f00-f88a2042983a.1756886.bt.exon_quantification.txt	0	0	0	0	0	0	0	0	0	0	0	0	0	0	0	0	0	0
unc.edu.708058d8-a732-4852-b6fc-1b2fc36c58ff.1861883.bt.exon_quantification.txt	0	0.0453102	0	0	0	0	0	0	0	0	0	0	0.197063	0	0	0	0	0
unc.edu.7dab0105-975d-459f-97d3-f1462afddd4d.1783462.bt.exon_quantification.txt	0	0	0	0.112301	0.117184	0.153526	0	0.170825	0.190572	0	0.373186	0.078502	0.299471	0.0617229	0.0467382	0.0186737	0	0
unc.edu.8a3bb9f6-2272-4cf6-8478-9bd51484f5c9.2283331.bt.exon_quantification.txt	0	0.144091	0	0	0	0.099952	0.110436	0	0.0797597	0	0.12148	0	0.0835577	0	0	0	0	0
unc.edu.f2bc7947-a557-4bdf-a777-71bd3a63b23d.2217722.bt.exon_quantification.txt	0	0.0271083	0.198072	0.206325	0.107648	0.282064	0.0519419	0	0.150054	0	0.228544	0	0.1572	0	0.0858692	0.051462	0.09343	0.0204057
unc.edu.c90eedc2-4b27-479c-b857-9a19267164dc.1804620.bt.exon_quantification.txt	0	0.136183	0.373141	0.388688	0.405588	0.177124	0.260938	0.328469	0.408319	0	0.287031	0.0905681	0.246786	0	0.107844	0.0646317	0.11734	0
unc.edu.f519f588-4934-4f83-8531-1be7a7f032b6.1756893.bt.exon_quantification.txt	0	0.158396	0	0	0	0	0	0	0	0	0	0	0.459265	0	0	0	0	0
unc.edu.f084bc5c-8949-4b41-820f-b9f3602cedb9.1756879.bt.exon_quantification.txt	0	0	0	0	0	0	0	0	0	0	0	0	0	0	0	0	0	0
unc.edu.4cca2f70-fb21-4bfa-b544-c8e7ff4cf58a.1783594.bt.exon_quantification.txt	0	0	0	0	0	0	0	0	0	0	0	0	0	0	0	0.023748	0.0646723	0
unc.edu.ee5a01f3-fd56-467d-bbbc-b1c3cd373138.1973056.bt.exon_quantification.txt	0	0.107085	0	0	0	0	0	0	0.148189	0	0.225703	0	0.0388114	0	0.0848018	0	0.0461343	0.0403041
unc.edu.98e3c8dd-71b9-4944-b7bb-aa216aaac0ab.1753872.bt.exon_quantification.txt	0	0	0	0	0	0	0	0	0	0	0	0	0	0	0	0	0	0
unc.edu.6faa391d-a7e8-4a3f-a89b-9bd1a588cf5f.2282950.bt.exon_quantification.txt	0.0744771	0.0799134	0.0729875	0.152057	0	0.103938	0.153121	0.308398	0.331762	0.456172	0.252649	0.0531463	0.144817	0.0835735	0.031642	0.0379266	0.0344281	0.0150386
unc.edu.14d89fac-d1b8-41fb-b812-0ba78aa61d90.1805334.bt.exon_quantification.txt	0	0	0	0	0	0	0	0	0	0	0	0	0	0	0	0	0	0
unc.edu.c0dfbc46-52e7-454f-8cca-ac933ed31789.1785252.bt.exon_quantification.txt	0	0.114676	0	0.290937	0.151793	0.198869	0.146486	0.221276	0.317386	0	0.161135	0.305061	0.16625	0	0	0	0	0.028774
unc.edu.6dca96d6-fdfa-4f4d-91d4-f29ad13c959f.1783580.bt.exon_quantification.txt	0.0534526	0.0286771	0	0	0	0.149194	0	0.0553348	0.105825	0	0	0	0.0831485	7.9775	5.76825	3.6112	4.5465	6.17378
unc.edu.1315e98d-1927-4702-9132-e02e56b2d2f1.1864851.bt.exon_quantification.txt	0	0.181019	0	0.114813	0	0.41856	0.346848	0.11643	0.222668	0	0.381533	0.160516	0.131215	0	0	0.114548	0.103982	0.0227103
unc.edu.9fa69546-20fc-49d2-bac2-7db3587e0a0a.1805723.bt.exon_quantification.txt	0	0	0	0	0	0	0	0	0	0	0	0	0.0388445	0	0	0	0	0
unc.edu.cb1e7865-b10c-4dcb-95db-537f3c53ffb5.1756508.bt.exon_quantification.txt	0	0	0	0	0	0	0.320526	0.645567	0.154327	0	0	0	0	0	0	0	0	0
unc.edu.b4bd08ed-0e1b-469e-a29c-fd3b536f1763.1756585.bt.exon_quantification.txt	0.26383	0	0	0	0	0.245463	0.27121	0	0.130583	0	0.596663	0	0	0	0	0	0	0
unc.edu.cbd09825-5118-4f55-b032-efced3e3699a.1744808.bt.exon_quantification.txt	0	0	0	0	0	0.0348625	0	0.0387906	0.0185464	0	0	0.0534784	0.0291443	0	0	0	0	0.0151326
unc.edu.5cd0eb59-abe2-4932-84d1-e76de485b53e.2122389.bt.exon_quantification.txt	0	0	0	0	0	0	0	0	0.0262819	0	0.120088	0	0.0413001	0	0	0	0	0
unc.edu.86414f87-c2a2-4ecb-92eb-7663492ba76b.1785271.bt.exon_quantification.txt	0	0.054099	0	0	0	0	0.0518291	0	0.0249548	0	0	0.071957	0.0784293	0	0	0	0.0466136	0.0203614
unc.edu.1fc1f310-7d16-4c24-b9bb-ff9c0a394e26.2305185.bt.exon_quantification.txt	0	0.132707	0.0808038	0.0841707	0.0878303	0.153425	0.0847593	0.21339	0.24486	0	0.18647	0.117676	0.19239	0.0462617	0	0	0	0.0332983
unc.edu.bcb942c5-e4d6-4e27-898c-90d1b8b3f19a.1756524.bt.exon_quantification.txt	0	0	0	0	0	0	0	0.289554	0.13844	0	0	0	0	0	0	0	0	0
unc.edu.32741f9a-9fec-441f-96b4-e504e62c5362.1755371.bt.exon_quantification.txt	0	0	0	0	0	0	0	0	0	0	0	0	0	0.217856	0	0	0	0
unc.edu.75c8ccb7-9a13-4e28-9946-9a80e13ba160.1753947.bt.exon_quantification.txt	0	0	0	0	0	0	0	0	0	0	0	0	0	0	0	0	0	0
unc.edu.af976606-3e8a-4f8e-85c4-5773a4c65756.1756589.bt.exon_quantification.txt	0	0.271762	0.496418	0	0	0	0	0	0	0	0	0	0.196991	0	0	0	0	0
unc.edu.ea40f663-3f52-4efe-98a4-7fe321aa4964.1783875.bt.exon_quantification.txt	0	0	0	0	0	0.055119	0.0609007	0.0613296	0.0586451	0	0.133982	0	0	0.0664794	0	0	0	0
unc.edu.6fcc9bee-2d5f-4f75-9710-381d57fc883c.1785272.bt.exon_quantification.txt	0	0	0	0	0	0	0.0536493	0.0540271	0	0	0	0	0	0.0585637	0.0443459	0	0	0
unc.edu.95e0c7c1-317c-4645-ba28-1ef598238f5b.2216976.bt.exon_quantification.txt	0	0.123211	0.112533	0.234444	0.489274	0.534176	0.885312	0.950983	0.568348	0	0.129846	0	0.446559	0.193282	0.0975719	0.0584756	0	0
unc.edu.f62909ce-f6f3-4a11-be01-4bf582e3ddb8.1864958.bt.exon_quantification.txt	0	0.0326598	0	0	0	0.0566378	0	0	0	0	0	0	0.047348	0	0	0	0	0
unc.edu.aee9c56c-b7fc-4fa1-9c77-08087dbe0169.1756897.bt.exon_quantification.txt	0	0	0	0	0	0.271349	0.299813	0	0	0	0	0	0	0	0	0	0	0
unc.edu.2e609497-e790-42cf-9cd1-7f2f03741adf.1783270.bt.exon_quantification.txt	0	0	0	0	0	0	0	0	0	0	0	0	0	0	0	0	0	0
unc.edu.5693546f-76cc-460e-ae90-01d44f010cda.1753925.bt.exon_quantification.txt	0	0.114139	0	0	0	0	0.2187	0	0	0	0	0	0	0	0	0	0	0
unc.edu.f334d507-bf76-4cd0-80eb-6135b697b9e9.1861579.bt.exon_quantification.txt	0	0	0	0	0	0	0	0	0.102769	0	0	0.0987776	0	0	0.0588098	0.0469935	0	0
unc.edu.de926d40-12cd-4aba-bb2e-10d2f7768f49.1875774.bt.exon_quantification.txt	0	0.0880035	0	0.111634	0	0	0	0	0.162377	0	0.247312	0	0.0850545	0	0	0.0185627	0.0505513	0
unc.edu.7af22bfc-9dbf-48a1-89d6-b8584bab10bb.2305520.bt.exon_quantification.txt	0.0380726	0.0204258	0	0	0	0.141688	0.117413	0.236479	0.018844	0	0	0	0.0592241	0	0	0.0387761	0	0
unc.edu.e63057bc-ca98-4d72-8097-1c1fb2d19882.1869558.bt.exon_quantification.txt	0	0	0	0	0.107159	0.140392	0.103412	0.0520703	0.149373	0	0	0.0717862	0.0782432	0	0	0.0341523	0	0
unc.edu.faaec742-95ec-4c88-8d88-0807203ca8c5.1756885.bt.exon_quantification.txt	0	0	0	0	0	0	0	0	0.15397	1.90538	0.703524	0	0	0	0	0	0.287604	0.125629
unc.edu.732f8856-da6b-49ed-9940-2b8af236de52.1755395.bt.exon_quantification.txt	0	0	0	0	0	0	0	0	0	0	0	0	0.145802	0.210356	0	0	0	0
unc.edu.6805b5da-d028-436d-85a7-1d151da16731.1805240.bt.exon_quantification.txt	0	0	0	0	0	0	0	0.0627725	0.0300124	0	0	0	0.0471624	0	0	0	0	0
unc.edu.2939b1f6-95d9-47c5-ab35-4432874df3fe.1756189.bt.exon_quantification.txt	0	0	0	0	0	0	0	0	0	0	0	0	0	0	0	0	0	0
unc.edu.036cbd41-560c-452d-94c4-f9ffeb1a3c46.2305163.bt.exon_quantification.txt	0	0	0	0	0	0	0	0	0	0	0	0	0.0872995	0	0	0	0	0
unc.edu.ba4c5bb6-117d-473e-8be9-4223e498b82a.1755375.bt.exon_quantification.txt	0	0.105635	0	0	0	0	0	0	0.0974541	0	0.44529	0	0.306284	0	0	0	0	0
unc.edu.1bd32c73-d248-4b86-8509-d2f8033ebf85.1755403.bt.exon_quantification.txt	0	0	0	0	0	0	0	0.253617	0.363774	0	0	0.349647	1.52439	0.549826	0.208171	0	0	0.0989385
unc.edu.e4d3986d-f3bd-44c2-a850-b72571bf0215.1752319.bt.exon_quantification.txt	0	0	0	0	0	0	0	0	0	0	0	0	0	0	0	0	0	0
unc.edu.bec43388-f9ec-4039-84ad-6d1a0f557922.1972883.bt.exon_quantification.txt	0	0.151335	0.110575	0.115183	0.480762	0.31493	0.0579941	0	0.195462	0	0	0.080516	0.219396	0	0.191749	0.0383056	0	0.0455668
unc.edu.aa380709-4475-4eca-904f-9cff28d4610b.2217268.bt.exon_quantification.txt	0.0486515	0	0	0	0	0	0.0500124	0	0.0722402	0	0	0.0694347	0.0378401	0	0	0	0	0
unc.edu.575b0136-4ffe-4ecc-8967-4e5af3c3c8ec.1951392.bt.exon_quantification.txt	0	0	0	0	0	0	0	0	0	0	0	0	0	0	0	0	0	0
unc.edu.52c17edc-35f9-484c-949d-62694cfc797a.1752332.bt.exon_quantification.txt	0	0	0	0	0	0	0	0	0	0	0	0	0	0	0	0	0	0
unc.edu.9acea60b-7f25-4abe-97a0-379c90922d72.1812216.bt.exon_quantification.txt	0	0.107728	0	0	0	0	0.275221	0.277159	0.198771	0	0.151372	0	0.0520591	0	0.113748	0.0227232	0	0.081092
unc.edu.1cbed3e0-7270-491c-90fa-aa54a92753f9.1971890.bt.exon_quantification.txt	0	0	0	0	0	0.0460557	0.101774	0.0512451	0	0	0	0	0	0	0	0	0.0457661	0.0199912
unc.edu.b0617934-4319-4d0c-aac4-c004349926f7.1783295.bt.exon_quantification.txt	0	0.060514	0	0	0	0	0.173925	0.116766	0	0	0	0	0.131594	0	0	0.0191465	0.052141	0.0455517
unc.edu.9c1d30c4-c8f0-4ca7-bec7-243f81b7680a.1753900.bt.exon_quantification.txt	0	0	0	0	0	0	0	0	0.25019	0	0	0	0.196578	0.283613	0.429517	0	0	0
unc.edu.2d2e8d25-3f08-4cd2-bc91-aa31a383cbd3.1756144.bt.exon_quantification.txt	0	0	0	0	0	0	0	0	0	0	0	0	0	0	0	0	0	0
unc.edu.e4c9e94b-f19d-47fc-867f-240745c556b8.1876345.bt.exon_quantification.txt	0	0	0	0	0	0	0	0	0.0456679	0	0	0	0	0	0	0	0	0
unc.edu.d6ef59bf-3da0-4399-842c-3067f53d2f4f.1783752.bt.exon_quantification.txt	0	0.0746138	0.181726	0	0	0.0431312	0.0476554	0	0.0917808	0	0.209684	0	0.180284	0	0	0	0.0857198	0.0374435
unc.edu.9be88350-4691-41cb-88c5-d1676dca68ab.1785258.bt.exon_quantification.txt	0	0.0356095	0	0	0.141406	0.18526	0	0	0.131407	0	0	0.0947282	0.258122	0	0	0	0	0
unc.edu.8220b852-fe5f-4dcb-bd92-bfee5147cacf.1861840.bt.exon_quantification.txt	0	0.0334437	0.122181	0	0	0.289986	0.256324	0.322661	0.308538	0	0.563912	0.177933	0.290907	0	0	0.0634889	0	0
unc.edu.0dc7cb6e-bb27-4da5-90ed-c062dc9fda0b.1949592.bt.exon_quantification.txt	0	0	0	0	0	0	0	0.100816	0.0482016	0	0	0	0.227236	0	0	0	0.180074	0
unc.edu.699710f3-f0ca-4875-ba01-b1196e9afeeb.1805057.bt.exon_quantification.txt	0	0	0	0	0	0	0	0	0.0289402	0	0	0.083449	0.136432	0	0	0	0	0
unc.edu.ae0b0540-fcb6-4c9e-8835-2cb24933a01f.1875789.bt.exon_quantification.txt	0	0.109503	0.200025	0	0	0	0.052454	0.105647	0.0252557	0	0	0	0	0	0	0	0	0
unc.edu.61f2a72b-a643-4c06-bdeb-ce77d4ce9bc1.2122380.bt.exon_quantification.txt	0	0	0	0	0	0.0536108	0.0592343	0	0	0	0	0	0	0	0	0	0	0
unc.edu.495bec4f-0d23-40ca-bcab-f03dd724137f.1785268.bt.exon_quantification.txt	0	0	0	0	0	0	0	0	0	0	0	0	0	0	0	0	0	0
unc.edu.106517be-43b1-471d-8162-00ad40675603.1755383.bt.exon_quantification.txt	0	0	0	0	0	0	0	0	0	0	0	0	0	0	0	0	0	0
unc.edu.13865eea-785e-48f0-8b1e-7457f6a91649.2217261.bt.exon_quantification.txt	0	0	0	0	0	0	0	0	0	0	0	0.211539	0.0384276	0	0	0	0	0
unc.edu.28c3f171-d7e6-40f2-8764-45b22ede8a0e.1804280.bt.exon_quantification.txt	0	0	0	0	0	0	0	0	0	0	0	0	0	0.0917304	0	0.0555043	0	0
unc.edu.a07d6a16-b755-4bfb-a982-eb5906cdc0f6.2449266.bt.exon_quantification.txt	0	0	0	0	0	0	0	0	0	0	0	0	0	0	0	0	0	0
unc.edu.82a1c742-2d97-4c7a-bf1d-ca0233c60b6c.1756535.bt.exon_quantification.txt	0	0	0	0	0	0	0	0	0	0	0	0	0	0	0	0	0	0
unc.edu.e5a1aad9-6d5d-4590-84b0-f719b7fb33a5.1785244.bt.exon_quantification.txt	0	0.11173	0.272124	0.141731	0	0.0645864	0	0	0.0687182	0	0	0	0	0	0	0	0	0.0280347
unc.edu.c73b5974-5e67-41c9-b2c9-b38420465112.2282834.bt.exon_quantification.txt	0	0	0	0	0	0	0	0	0	0	0	0	0	0	0	0	0	0.038356
unc.edu.35a1e749-32c4-4d3b-8172-7c26cd7f591e.1756160.bt.exon_quantification.txt	0	0	0	0	0	0.318105	0	0.353948	0	0	0	0	0.531858	0	0	0.116075	0	0
unc.edu.23220ecf-79ad-43e2-93ef-bb8120a59f4d.1756102.bt.exon_quantification.txt	0	0	0	0	0	0	0	0	0	0	0	0	0	0	0	0	0	0
unc.edu.f017e087-41c2-495b-82bd-8d425a4aacf4.1804765.bt.exon_quantification.txt	0	0.130085	0.118811	0.123761	0.129142	0.112795	0.0623134	0	0.0900083	0	0	0	0	0	0	0	0	0.0734409
unc.edu.470561f0-ed96-4076-ae5f-a943441509d0.1756220.bt.exon_quantification.txt	0.242515	0.520435	0	0	0.516663	0.676894	0.498598	0	0.240066	0	0	0.692228	0.377246	0	0	0	0	0
unc.edu.7d32ee7b-77a7-4c50-923f-a870221640e5.2625259.bt.exon_quantification.txt	0	0.059028	0	0	0	0.102365	0	0	0.0544568	0	0	0	0.128362	0	0	0	0	0
unc.edu.d0520423-038d-4da6-923b-b76f7a55244a.2624966.bt.exon_quantification.txt	0	0.110406	0.13445	0	0	0.191463	0	0	0.033952	0	0.155134	0	0.0533531	0	0	0	0	0
unc.edu.bec98631-8daf-4f90-a095-485b8078e4d6.1785270.bt.exon_quantification.txt	0	0	0	0	0	0.0581542	0	0.0647068	0.0928118	0	0	0.0892074	0	0	0	0	0	0
unc.edu.d13cde5b-7e54-46fb-b416-e6c2f5687b8e.1753901.bt.exon_quantification.txt	0	0	0	0	0	0	0	0	0	0	0	0	0	0	0	0	0	0.0873549
unc.edu.d28cd72f-27c3-4bea-bfc1-233461270a0b.1756615.bt.exon_quantification.txt	0	0	0	0	0	0	0	0	0	0	0	0	0	0	0	0	0	0
unc.edu.3b6806b3-f244-4d8f-882c-e675bfd95fd1.1865269.bt.exon_quantification.txt	0	0	0	0	0	0	0	0	0	0	0	0	0	0	0	0	0	0
unc.edu.20a84f89-898c-413c-b4a4-47458ad958e4.1864960.bt.exon_quantification.txt	0	0	0	0	0	0	0	0	0	0	0	0	0	0	0	0	0	0
unc.edu.b1a08390-b233-490f-8b9c-bb7ca78e6cab.1783585.bt.exon_quantification.txt	0.0571176	0.0306434	0	0	0.243371	0.106282	0	0.0591288	0.084811	0	0	0.163035	0.0444248	0	0	0.0581729	0.105614	0
unc.edu.c9ebb6d9-fbc9-44ae-9964-89d7c7db66f3.1756578.bt.exon_quantification.txt	0	0	0	0	0	0	0	0	0	0	0	0	0	0	0	0	0	0
unc.edu.1d71d88a-0007-40e9-85e5-1a4eeb0a74df.1756556.bt.exon_quantification.txt	0	0	0	0	0	0	0	0	0	0	0	0	0	0	0	0	0	0
unc.edu.ee650e88-f485-4dae-aa97-0775d9b0a7bf.1785242.bt.exon_quantification.txt	0	0	0	0	0	0	0	0	0.0392617	0	0.179396	0.113211	0	0	0	0	0	0
unc.edu.33080658-bebd-43b2-a4a1-0be6adbde3a5.1756898.bt.exon_quantification.txt	0	0	0	0	0	0.242593	0.268039	0	0	0	0	0	0	0	0	0	0	0
unc.edu.c3a004b4-f231-4be4-9738-2f3b6290598f.1756085.bt.exon_quantification.txt	0	0	0	0	0	0	0	0	0.145136	0	0	0	0	0	0	0	0	0
unc.edu.9b00f3e1-6d27-47d6-b9ce-1389db097741.2041374.bt.exon_quantification.txt	0	0.269672	0	0.0932956	0	0.212572	0.23487	0.141914	0.113086	0	0.206686	0.130433	0.106624	0	0	0	0	0
unc.edu.9515a5bc-b9bc-4333-9e95-d8740283bee8.1753883.bt.exon_quantification.txt	0	0.371866	0	0	0	0	0.356264	0.358772	0	2.12274	0.78378	0.494618	0	0	0	0	0	0
unc.edu.caf2f9a3-64ca-44a0-bb55-23f5f50ed6a9.1754522.bt.exon_quantification.txt	0	0	0	0	0	0	0	0	0.440906	0	0	0	0	0	0	0	0	0
unc.edu.6805b5da-d028-436d-85a7-1d151da16731.1753961.bt.exon_quantification.txt	0	0	0	0	0	0	0	0	0	0	0	0	0	0	0	0	0	0
unc.edu.9abef075-5168-4a66-9826-fd61c94b8f6d.2154739.bt.exon_quantification.txt	0	0	0	0	0	0	0	0	0	0	0	0	0	0	0	0	0	0.0212513
unc.edu.9c737eba-552c-4952-aa86-6c54edad4fb1.2282861.bt.exon_quantification.txt	0	0	0	0	0	0	0	0	0	0	0	0	0	0	0	0	0	0
unc.edu.13397543-2451-40c1-a9ca-3cf2e6578a79.1865270.bt.exon_quantification.txt	0	0.0936271	0	0	0.185897	0.202957	0.179397	0.0451652	0.0431883	0	0.0986686	0.1868	0.101801	0	0.037072	0.0148117	0.0806724	0.0528582
unc.edu.67cab911-4a5a-410b-87f5-22393125e768.2120694.bt.exon_quantification.txt	0	0.139497	0	0	0.553944	0.120956	0	0	0.0643471	0	0	0	0.101117	0	0	0	0.120195	0.052503
unc.edu.4c3f5930-d886-436e-861a-7ed08c44e32b.1804267.bt.exon_quantification.txt	0	0	0	0	0	0	0	0	0	0	0	0	0	0	0	0	0	0
unc.edu.127842a2-ceb2-40c7-9c74-c720682f96cd.1874870.bt.exon_quantification.txt	0.111043	0.29787	0.217644	0.113356	0.236569	0.464903	0.399521	1.43691	0.851888	0	0.251127	0.713153	0.518199	0.24921	0.0943542	0.018849	0.051331	0.179377
unc.edu.94bcd902-dea9-4d95-a202-943d226f7ad5.1802745.bt.exon_quantification.txt	0.0543833	0.0583528	0.106591	0	0.11586	0.101194	0.111809	0.168895	0.0807509	0	0.12299	0.0776149	0.253789	0	0	0	0	0.0439249
unc.edu.578f08c1-84d4-4dea-8b0d-a41a803bb7ce.1783540.bt.exon_quantification.txt	0	0	0	0	0	0	0	0.0755898	0	0	0	0	0.0567923	0	0	0	0	0
unc.edu.52a9c93c-8753-4bfd-87d6-1a63a6e280af.2148609.bt.exon_quantification.txt	0	0.0239695	0	0	0	0.166269	0.091855	0	0.0442265	0	0	0.127527	0.0694988	0	0	0.0151677	0	0
unc.edu.7cc60267-f936-406a-b8b9-86ea549ffb80.1756086.bt.exon_quantification.txt	0	0	2.56979	2.67687	0	0	0	0	0	0	0	0	0	0	0	0	0	0
unc.edu.3c7cf914-e9ed-43ed-8639-525998b2fe4d.1875103.bt.exon_quantification.txt	0	0	0	0	0	0.049734	0.109902	0	0	0	0	0	0	0	0	0	0	0
unc.edu.fa279a9c-78d8-4727-a559-b7eca7a119b8.1971521.bt.exon_quantification.txt	0	0	0	0	0	0	0	0.0593608	0.0283813	0	0	0	0	0	0	0	0	0
unc.edu.5cb631b5-acb1-4ad3-b2da-1f2a22c48232.1756153.bt.exon_quantification.txt	0	0	0	0	0	0	0.233926	0.235574	0	0	0	0	0	0	0	0	0	0
unc.edu.5f8c2272-4530-45b3-a6d7-00de9be46d71.1754532.bt.exon_quantification.txt	0	0	0	0	0	0.693869	0.511101	0	0.246086	0	1.12442	0.354794	0.193353	0	0	0.0843966	0	0
unc.edu.002f75a0-98e8-4b4b-a568-538b79703c19.1785248.bt.exon_quantification.txt	0	0.284184	0.259554	0	0	0.677634	1.22517	1.2338	0.753756	0	0.449229	0.850481	0.823982	0	0.0562618	0.0449574	0.183647	0.0267398
unc.edu.47964b92-bd93-45b1-97c9-194da4c9dccb.2122383.bt.exon_quantification.txt	0	0	0	0	0	0	0	0	0.053217	0	0	0	0	0	0	0	0	0
unc.edu.2e53bfd9-29f1-416b-95ee-f29b0bc07cd9.1756104.bt.exon_quantification.txt	0	0	0	0	0	0	0	0	0	0	0	0	0	0	0	0	0	0
unc.edu.ea5f9e01-89a4-4129-beb8-923c8561850a.1756527.bt.exon_quantification.txt	0	0	0	0	0	0	0	0	0	0	0	0	0	0	0	0	0.516954	1.46778
unc.edu.76dbad94-73a2-4903-8a6f-3f3b40ce6f48.1785266.bt.exon_quantification.txt	0	0.122298	0	0	0.121412	0	0.292916	0.0589958	0.0282068	0	0	0	0	0	0	0	0	0.0230149
unc.edu.0b0bbc77-a9f3-4298-ba21-587d10209b0b.1865029.bt.exon_quantification.txt	0.0521222	0.0279634	0	0	0	0	0	0.0539575	0.0257979	0	0	0	0	0	0	0	0	0
unc.edu.4caafd38-d9aa-41a8-af74-cd7e7eafc18a.1756598.bt.exon_quantification.txt	0	0	0	0	0	0	0	0	0	0	0	0	0	0	0.887491	0	0	0
unc.edu.6d26af33-f181-4b3f-95b9-ac3c15c96592.1785261.bt.exon_quantification.txt	0	0.0341854	0	0	0	0	0.131004	0.0659633	0.094614	0	0	0	0	0	0	0	0.0589106	0.0257329
unc.edu.151bb98d-d961-49c1-a54f-8293b3ab2ebd.1753953.bt.exon_quantification.txt	0	0	0	0	0	0	0	0	0	0	0	0	0	0	0	0	0	0
unc.edu.2f3757e6-a1e3-4023-bc14-afeacb440a9c.1756565.bt.exon_quantification.txt	0	0	0	0	0	0	0	0	0	0	0	0	0	0	0	0	0	0
unc.edu.58d47d74-8218-4ec8-9956-f737382d4f30.1783530.bt.exon_quantification.txt	0	0	0	0	0	0.0616823	0	0.0686324	0.0328142	0	0	0	0	0	0	0	0	0
unc.edu.0e3fb123-3857-43d4-8ba7-46412571ccdf.1785255.bt.exon_quantification.txt	0	0	0	0	0	0	0	0	0	0	0	0	0	0	0	0	0	0
unc.edu.5a6fa767-e7be-418d-afec-ab806dd0796b.1869818.bt.exon_quantification.txt	0	0.204969	0.166404	0	0.180874	0.51343	0.3491	0.483392	0.399202	0	0.384009	0.181752	0.561284	0	0.0721405	0.0144114	0	0.0342866
unc.edu.71704004-c6ff-403f-9480-4a25dd087bee.1782167.bt.exon_quantification.txt	0	0.0774346	0	0	0	0.0671426	0.0741856	0	0	0	0	0.102996	0.0561298	0	0	0	0	0
unc.edu.b4fe4472-ff04-497b-bd11-f9bab81b2062.1802737.bt.exon_quantification.txt	0	0	0	0	0	0	0	0.0665978	0	0	0	0	0	0	0	0	0	0.051961
unc.edu.bac7f8ed-938d-4827-8180-d06ce460aa61.1813136.bt.exon_quantification.txt	0.0563107	0	0	0	0	0	0.115772	0.174881	0.111484	0	0	0.0803658	0	0.0631884	0.0478479	0	0.0520609	0.0227409
unc.edu.100d05e8-c2b5-4177-8685-b47875a5614c.1785262.bt.exon_quantification.txt	0	0	0	0	0	0	0.0584094	0	0.0562461	0	0	0	0	0	0	0	0	0.0229466
unc.edu.f1e06c46-dbe7-4e9c-9a9b-e37e9d5b8deb.1783550.bt.exon_quantification.txt	0	0.306419	0.248767	0	0.135199	0.531384	0.521888	0.394172	0.188459	1.16609	1.14815	0.905703	0.592301	0.0712118	0	0.172356	0	0.0512568
unc.edu.063ab4f7-2fb9-4e6e-9d47-c1199ba8d9a3.1861745.bt.exon_quantification.txt	0	0.0460855	0	0	0	0	0.0883037	0	0.0850332	0	0.194268	0.122596	0.133624	0	0	0	0	0
unc.edu.99cb42da-b846-4463-b13a-79a08f5be5ea.1869875.bt.exon_quantification.txt	0.0475607	0.204129	0.466095	0	0.101325	0.0442496	0.146673	0.295413	0.141241	0	0.10756	0.203634	0.147967	0	0	0.064586	0.0439713	0.0384144
unc.edu.64bf47b5-577f-4ce2-a6e3-374a35f9a58f.1812462.bt.exon_quantification.txt	0	0.0768118	0.0935398	0.0974372	0	0.0444018	0.0490593	0.296429	0.141727	0	0	0.204334	0.148476	0.0535533	0	0	0	0.0385466
unc.edu.9fa69546-20fc-49d2-bac2-7db3587e0a0a.1754513.bt.exon_quantification.txt	0	0	0	0	0	0	0	0	0	0	0	0	0	0	0	0	0	0
unc.edu.a4bf07a3-893a-462a-bd60-821fab35608d.1754009.bt.exon_quantification.txt	0	0	0	0	0	0	0.320379	0	0	0	0	0	0	0	0	0	0	0
unc.edu.99967caa-2b08-4ac8-8a3b-166661deee81.1864962.bt.exon_quantification.txt	0.0568413	0.213466	0.779862	0.464204	0.36329	0.793259	1.05176	1.11801	0.618938	0	0.899841	1.0546	0.928407	0.255135	0.193195	0.0964857	0	0.0918205
unc.edu.81ea1d15-ed50-4948-8ed8-aced012a582a.1875100.bt.exon_quantification.txt	0	0	0	0	0	0	0	0	0.0542448	0	0	0	0.0426209	0	0	0	0.0506626	0.0221301
unc.edu.5211d679-261f-4eda-ae1e-c4b33cbac9c3.2446142.bt.exon_quantification.txt	0	0	0	0	0	0	0	0	0	0	0	0	0	0	0	0	0	0
unc.edu.f929a4be-b527-4e99-9b29-ef28d62f0bbb.1862040.bt.exon_quantification.txt	0.0490411	0.0526208	0	0	0	0	0	0.0507679	0.0970916	0	0	0.0699908	0.0762862	0	0	0	0	0
unc.edu.c30ce88d-5dff-4503-b090-01b4b6aa0b80.1753572.bt.exon_quantification.txt	0	0	0	0	0	0	0.293783	0.295852	0	0	0	0	0	0	0	0	0	0
unc.edu.82bb01e9-a659-417b-b9e8-831a76277a21.1755750.bt.exon_quantification.txt	0	0	0	0	0	0	0	0.280858	0.134282	0	0	0	0	0	0	0	0	0
unc.edu.778a27dd-94f3-484f-9da5-9ba003dde54d.1754533.bt.exon_quantification.txt	0	0	0	0	0	0	0	0	0.120544	0	0	0	0	0	0	0	0	0
unc.edu.6a6c9cda-e73d-444b-87f1-54b8d59709f8.1756212.bt.exon_quantification.txt	0	0.135028	0	0	0	0	0.258725	0	0.124571	0	0.569195	0.359201	0.39151	0	0	0.0854449	0	0
unc.edu.be646d0d-d5a6-478b-a3eb-71142d84c884.1864678.bt.exon_quantification.txt	0	0	0	0	0	0	0	0	0	0	0	0	0	0	0	0	0	0
unc.edu.fac5986e-a117-420a-8108-655b0d7d39d6.1950132.bt.exon_quantification.txt	0	0	0	0	0	0.0461056	0	0	0	0	0	0	0	0	0	0	0	0
unc.edu.590576e0-24f2-4e70-8fd9-406fdc4dff5e.1874748.bt.exon_quantification.txt	0	0.0310505	0	0	0	0.053847	0.0594953	0.119829	0.0859376	0	0.261779	0.0826003	0.18006	0	0	0.0392971	0	0.0467463
unc.edu.edb12ff7-a099-4b48-a734-eee8e6e1b6a7.1744823.bt.exon_quantification.txt	0	0.0228041	0.0833111	0	0	0	0	0.0440023	0.0420763	0	0	0.0606634	0.0661199	0	0	0	0	0
unc.edu.9524eea3-e02b-4c4a-91f6-9313c00151e6.1756165.bt.exon_quantification.txt	0	0	0	0	0	0	0	0	0	0	0	0	0	0	0	0	0	0
unc.edu.4487f658-d3c7-4efa-bdaa-dfec82673a5e.1756185.bt.exon_quantification.txt	0	0	0	0	0	0	0	0	0	0	0	0	0	0	0	0	0	0
unc.edu.745e0cd1-721b-4598-b560-3efdccaa854f.1783869.bt.exon_quantification.txt	0	0	0	0	0.117167	0	0	0.113867	0.081662	0	0	0	0.0427753	0	0	0	0	0
unc.edu.26aac147-be13-44e0-9bc5-74366c01f726.2282522.bt.exon_quantification.txt	0	0	0	0	0	0	0	0	0	0	0	0	0.0430674	0	0	0	0	0
unc.edu.11ab1458-48c5-4a78-be11-60093f5f47ad.2623462.bt.exon_quantification.txt	0	0	0	0	0	0	0	0	0	0	0	0	0	0	0	0	0	0
unc.edu.c802ea4d-922b-4a14-a74d-95f3ca10f9a3.1784113.bt.exon_quantification.txt	0	0	0	0	0	0	0	0	0	0	0	0	0	0	0	0	0	0
unc.edu.8e95aefa-3df8-4c97-abda-bb4e8b3309e2.1785249.bt.exon_quantification.txt	0	0	0	0	0	0	0	0	0	0	0	0.100785	0.0549249	0	0	0	0	0
unc.edu.c673cfcd-b99f-4c5d-a2db-5d0f360b8723.2316447.bt.exon_quantification.txt	0	0.0270483	0	0	0	0	0	0	0.0499073	0	0	0	0	0	0	0	0	0
unc.edu.84834bf6-2a9c-4c2d-adcc-0e9a772c4cfe.1793217.bt.exon_quantification.txt	0	0.290766	0	0	0	0	0	0	0.100593	0	0.153211	0	0	0	0	0.0689982	0.0626336	0
unc.edu.108f0dea-e0f7-404f-8fb7-3fa4627af7c8.1755391.bt.exon_quantification.txt	0	0	0	0	0	0.289957	0	0	0	0	0	0	0	0	0.529633	0	0	0
unc.edu.725dfae8-e218-4991-b48d-31da87d75a4e.1754498.bt.exon_quantification.txt	0	0	0	0	0	0	0	0	0	0	0	0	0	0	0	0	0	0
unc.edu.2349d0c9-9b3d-4ca7-a8bb-987736c4585d.2282896.bt.exon_quantification.txt	0.11574	0.538151	0.453703	0.236303	0.65754	0.897355	0.674208	0.639018	0.706523	1.65412	1.48326	1.04616	1.17026	0	0.032782	0.0392929	0.0356684	0.0779022
unc.edu.9e6aa254-9b82-4df4-bffe-3a69f7617114.1756594.bt.exon_quantification.txt	0	0	0	0	0	0	0	0	0	0	0	0	0	0	0	0.162958	0	0
unc.edu.45ef09fb-4989-4774-812a-e33937b13621.1785256.bt.exon_quantification.txt	0	0	0	0	0	0	0	0	0	0	0	0	0	0	0	0	0	0
unc.edu.e02bd3ae-f273-4ec0-b6a6-8e469c440b07.1861992.bt.exon_quantification.txt	0	0.0522219	0	0	0.103687	0	0.100061	0.0503831	0	0	0	0	0.18927	0	0	0.0330457	0.0899924	0.0393099
unc.edu.ecf0b608-fed2-4082-a936-8f9cf510be99.1802305.bt.exon_quantification.txt	0	0	0	0	0	0	0	0	0	0	0	0	0	0	0	0	0	0
unc.edu.83393025-bd1c-430a-8438-fe8e79ae9dc5.2305179.bt.exon_quantification.txt	0	0.0651498	0.158676	0.165287	0.172474	0.150642	0.0416108	0	0.0400697	0	0.0915438	0	0.251867	0	0.0343951	0.0137421	0.0374236	0.0163471
unc.edu.9a9659ea-3ac5-4bde-81eb-b57bf44c8d2c.1756587.bt.exon_quantification.txt	0	0	0	0	0	0	0	0	0	0	0	0.799755	0.653768	0	0	0	0	0
unc.edu.2c113ebf-70de-4752-81de-a873f4f3db64.1753552.bt.exon_quantification.txt	0	0	0	0	0	0	0	0	0	0	0	0	0	0	0	0	0	0
unc.edu.74d5b39f-cba9-403a-942d-a7a4dabb8bad.1755386.bt.exon_quantification.txt	0	0	0	0	0	0.185999	0	0.206956	0.0989487	0	0	0	0	0	0	0.0678701	0	0
unc.edu.37e5e5de-8f04-4123-ab14-213e1a569f72.1865030.bt.exon_quantification.txt	0	0.128473	0.281612	0.293346	0.408133	0.623824	0.640027	0.396637	0.45039	0	0.324937	0.341762	0.260752	0	0.0813908	0.0650374	0	0.038683
unc.edu.183ebc05-d1d5-4ebd-a7ca-90c782ced6d4.1756159.bt.exon_quantification.txt	0	0	0	0	0	0	0.414038	0	0	0	0	0	0	0	0	0	0	0
unc.edu.fbb56fa6-5205-4a92-9154-6f1a3bc6da28.2449294.bt.exon_quantification.txt	0	0.0231789	0	0	0.0920438	0	0.0444127	0	0.0855356	0	0	0	0.0336033	0.0484811	0	0	0	0
unc.edu.a5315ab1-d2f9-4d83-a1d5-7c903573d695.1804873.bt.exon_quantification.txt	0.0534913	0.0573958	0.104843	0	0	0.199069	0.109975	0	0	0	0.120973	0.0763419	0.0416043	0	0.0454521	0.0181599	0	0
unc.edu.2e609497-e790-42cf-9cd1-7f2f03741adf.1754000.bt.exon_quantification.txt	0	0	0	0	0	0.41486	0	0	0	0	0	0	0	0	0	0	0	0
unc.edu.b91e601e-6aaa-4ad9-86c9-92f96bb2c6fe.1812458.bt.exon_quantification.txt	0	0	0	0	0	0	0	0	0.0792953	0	0	0	0	0	0	0	0	0
unc.edu.b63c5cf4-5e75-498e-b08f-ceb835b71182.1754537.bt.exon_quantification.txt	0	0	0	0	0	0.214385	0.236872	0.954162	0	0	0	0.328862	0	0	0	0	0	0
unc.edu.f0c640c5-2779-4d91-8244-9d2d39d83790.2283733.bt.exon_quantification.txt	0.131108	0.351696	0.34263	0.446132	0.744847	0.813204	0.673878	0.361933	0.475875	0.803038	0.0988355	0.249488	0.305919	0	0.0742695	0.0148367	0	0
unc.edu.ecf539d8-a411-43d8-8ce4-97a19c6ed6c5.1783576.bt.exon_quantification.txt	0	0	0	0	0	0	0	0	0	0	0	0	0	0	0	0	0	0.0231533
unc.edu.2a0775eb-9db0-4bfc-ae9f-cd6786cdf115.1753946.bt.exon_quantification.txt	0	0	0	0	0	0	0	0	0	0	0	0	0	0	0	0	0	0
unc.edu.f563a144-d064-4689-9229-972a9073a9a4.1756157.bt.exon_quantification.txt	0	0	0	0	0	0	0	0	0	0	0	0	0	0	0	0	0	0
unc.edu.a28a6e48-d0c8-434d-a9f6-22b7f6a44707.1783346.bt.exon_quantification.txt	0	0.0866702	0.21109	0.109943	0	0.300603	0.221423	0.111491	0.186569	0.659656	0.243565	0.0768531	0.335063	0	0	0	0	0.0434938
unc.edu.f2cc3ef8-61a0-48f3-bef4-04cd0820c331.1756584.bt.exon_quantification.txt	0	0	0	0	0	0	0	0	0	0	0	0	0	0	0	0	0	0
unc.edu.b254c0ed-6844-4298-89a9-d436a0c38ca8.2122377.bt.exon_quantification.txt	0.106531	0.0571536	0.104401	0	0	0	0.109511	0	0	0	0.120462	0.228059	0.165715	0	0	0	0	0
unc.edu.4bc6fee0-71a0-43c6-a700-e3dc86865d70.1875102.bt.exon_quantification.txt	0	0.0276253	0	0.105129	0.1097	0.0479071	0	0	0	0	0	0	0.0800986	0	0	0	0.0476058	0.0415897
unc.edu.7ff4a152-f31d-43c5-bdda-3b95d6972652.1744806.bt.exon_quantification.txt	0	0	0.0777609	0	0	0	0	0	0.0392732	0	0	0	0.0308575	0	0	0	0	0
unc.edu.a78a205c-0c7f-4e26-bff9-0de2501031db.1972680.bt.exon_quantification.txt	0	0.0627805	0	0	0	0.108872	0.180439	0.0605699	0.0289593	0	0.132322	0	0	0	0	0.0198636	0.0540939	0.0708867
unc.edu.29a63711-6e49-4659-a7e0-8e8fef23a941.1785254.bt.exon_quantification.txt	0	0.352406	0	0	0	0.488908	0.33762	0.135999	0.130046	0	0	0.0937469	0.357627	0.0737094	0	0.0223001	0.0607292	0.0795819
unc.edu.737e82bb-30eb-41ef-8b8b-9ce486e7a196.1753591.bt.exon_quantification.txt	0	0	0	0	0	0	0	0	0	0	0	0	0	0	0	0	0	0
unc.edu.ee944fbe-c1de-4060-b05f-81cde4ec0c27.1756208.bt.exon_quantification.txt	0	0	0	0	0	0	0	0	0	0	0	0	0	0	0	0	0	0
unc.edu.9774e154-3b3f-45ce-8082-243bd03a0493.1812494.bt.exon_quantification.txt	0	0	0	0	0	0	0.251878	0.338202	0.121274	0	0	0.116565	0.127049	0	0	0	0	0
unc.edu.c6652862-6909-4778-8b3b-9db4cee801b6.1862014.bt.exon_quantification.txt	0.157105	0.632146	0.461888	0.0801889	0.167351	0.950086	1.53424	0.97582	1.08863	1.92453	0.710597	0.616598	0.549867	0	0.0667468	0.106672	0.0726239	0.0793077
unc.edu.c18465ae-447d-46c8-8b54-0156ab502265.1783696.bt.exon_quantification.txt	0	0	0	0	0	0.109181	0.0603166	0	0	0	0	0	0	0	0	0	0	0
unc.edu.19cc121b-759b-4368-8a98-b0bd8cf7269a.1874745.bt.exon_quantification.txt	0	0.290837	0	0.245955	0	0.336242	0.185756	0.374128	0.298127	0	0.272442	0.171929	0.515334	0.0675906	0	0	0.111376	0.0486504
unc.edu.a8bd3749-191b-4e70-9046-a0a2132fec94.1864957.bt.exon_quantification.txt	0	0.030745	0.112322	0	0	0.106635	0.17673	0.177975	0.113456	0	0	0	0.579437	0.0643063	0.0486944	0	0.0529819	0.0231432
unc.edu.b16349cb-2b41-4235-b20f-116b8c71604f.1875787.bt.exon_quantification.txt	0	0.0254029	0	0	0	0	0.0486741	0	0.16405	0	0.107083	0.135153	0.14731	0	0	0.0160748	0	0.0382439
unc.edu.5f8c2272-4530-45b3-a6d7-00de9be46d71.1805419.bt.exon_quantification.txt	0	0	0	0	0	0.05308	0	0.118122	0.141189	0	0	0.162847	0.133121	0	0	0	0	0.0230402
unc.edu.d8def559-0b6a-439f-aa27-735443e1d12c.1756616.bt.exon_quantification.txt	0	0	0	0	0	0	0	0.264132	0.126285	0	0	0	0	0	0	0	0	0
unc.edu.e1522cf2-53d1-485b-bf05-0f06194da23e.2148324.bt.exon_quantification.txt	0	0	0	0	0	0	0	0.109202	0	0	0.119282	0	0	0	0	0	0	0
unc.edu.ffac8b7c-64ac-429c-800b-fb2a5b6deefe.1756105.bt.exon_quantification.txt	0	0	0	0	0	0	0	0	0	0	0	0.378102	0	0	0	0	0	0
unc.edu.e108b927-32dc-4934-95ed-5e8d3fd8a83c.1753992.bt.exon_quantification.txt	0	0	0	0	0	0	0.316908	0	0	0	0	0	0	0	0	0	0	0
unc.edu.3da331ff-7e07-4aa6-bdf0-1afd8c479980.1874746.bt.exon_quantification.txt	0	0	0	0	0	0	0	0	0	0	0	0	0	0	0	0	0	0
unc.edu.e6f79fed-fbb6-476a-92c1-f71424a55737.2246725.bt.exon_quantification.txt	0	0	0	0	0	0	0	0	0	0	0	0	0.0771295	0	0	0	0	0
unc.edu.a7afe8c9-e9ef-455d-b6f4-42fc9bfb3ed6.1756878.bt.exon_quantification.txt	0	0	0	0	0	0.282579	0	0	0	0	0	0	0	0	0	0	0	0
unc.edu.7ac6df66-aaf9-4347-8a32-a23147f58acf.1793502.bt.exon_quantification.txt	0	0	0	0	0	0	0	0.0663553	0.0317254	0	0.144961	0	0	0	0	0	0	0
unc.edu.fa58821e-b6a7-4d83-be93-b1ae5a382824.2638679.bt.exon_quantification.txt	0	0	0	0	0	0	0.270928	0.0909454	0.173929	0	0.198681	0.125381	0.0683294	0	0.0746489	0.0298251	0	0
unc.edu.9ce14e45-f554-4ce7-9f35-d4698c8dbb31.1874872.bt.exon_quantification.txt	0	0	0	0	0	0	0	0	0	0	0	0	0	0	0	0	0	0
unc.edu.ab5e0fde-c76b-4f9a-ae15-fa17e8695dbd.1940754.bt.exon_quantification.txt	0.0590308	0	0.1157	0	0	0	0	0	0.0292172	0	0	0	0	0	0	0	0	0
unc.edu.c71d1986-7539-4044-a257-4018fb985107.2217120.bt.exon_quantification.txt	0	0	0.094116	0.0980375	0	0	0	0	0.0237667	0	0	0.0685311	0	0	0	0	0	0
unc.edu.4a01323f-408b-4e74-8686-ee6d4d076ee8.1805549.bt.exon_quantification.txt	0	0.115324	0	0	0	0.0499982	0.0552427	0.0556318	0.0265984	0	0.121534	0	0	0	0	0.0364883	0	0.0217025
unc.edu.fecdc742-c116-479c-8660-03b122543662.1864961.bt.exon_quantification.txt	0	0.0920939	0.11215	0	0	0	0	0	0.0566414	0	0	0.0816625	0.133512	0	0	0	0	0
unc.edu.4a3e65c1-08b7-4154-a429-2fe24b0f8109.2283330.bt.exon_quantification.txt	0	0.0558575	0.102033	0	0.221811	0.387467	0.321083	0.215563	0.0515319	0	0.11773	0.594367	0.364404	0	0.044234	0.0176732	0	0.0210233
unc.edu.681e8dff-28d1-4269-a4d2-f4446e67c4ba.2638729.bt.exon_quantification.txt	0	0	0	0	0	0	0	0	0	0	0.115786	0.146138	0.119462	0	0	0	0	0
unc.edu.2d950f6f-304f-4f54-9afc-b8fc3009ea92.1755396.bt.exon_quantification.txt	0	0	0	0	0	0	0	0	0	0	0	0	0	0	0	0	0	0
unc.edu.0a5bfec3-a22f-4cc3-bc36-c1d3138c462f.1756481.bt.exon_quantification.txt	0	0	0	0	0	0	0	0	0	0	0	0	0	0	0	0	0	0
unc.edu.e578bc5f-42e0-488e-9c6a-f017c455ef4d.1811756.bt.exon_quantification.txt	0	0	0	0	0	0	0	0	0	0	0	0	0	0	0	0	0	0
unc.edu.ec575115-1302-4b57-afc0-8dcbb47c0b41.1785246.bt.exon_quantification.txt	0	0	0	0	0	0	0	0	0	0	0	0	0	0	0	0	0	0.0239662
unc.edu.2f165c52-b5b5-4c07-8048-1f1b32faa7c3.1785239.bt.exon_quantification.txt	0	0.0664516	0	0	0	0	0.0636634	0.0641118	0.0306528	0	0	0.0883871	0.144506	0	0	0	0	0
unc.edu.61df6b3d-4a00-4b56-989d-f01d4850a4d9.1864849.bt.exon_quantification.txt	0.0637562	0.27364	0.124962	0	0.135829	0	0.131079	0.0660012	0.0631122	0	0	0.181984	0.0991764	0.21463	0.216698	0.0216447	0	0
unc.edu.c428bc7d-84de-46e7-97ad-5994999e183e.1805342.bt.exon_quantification.txt	0	0	0	0	0	0	0	0	0	0	0	0.0825038	0.0449624	0	0	0	0	0.0700376
unc.edu.a7f46d1b-b6f3-4b3e-a5aa-12eddaf26a44.2283515.bt.exon_quantification.txt	0.0493737	0.105955	0.0967725	0.302414	0.42075	0.183745	0.10151	0.153337	0.048875	0	0	0.0704654	0.153607	0.0554041	0.0419534	0.033524	0	0
unc.edu.a75e2b44-3976-411b-9696-25ed76c1faee.1951396.bt.exon_quantification.txt	0	0.0531758	0.194269	0	0	0	0.0509447	0	0.0245289	0	0	0.212187	0	0.0556114	0.0421103	0	0	0
unc.edu.b8290920-9642-4137-ad13-88590a6694e8.2283660.bt.exon_quantification.txt	0.0862011	0.115616	0	0	0	0.0400999	0	0.0892364	0.255991	0	0.0974736	0	0.0670453	0	0	0	0	0
unc.edu.814f60a7-10b6-4b53-aef9-6252a25e29c4.1753978.bt.exon_quantification.txt	0	0	0	0	0	0	0.741341	1.11984	0.356942	0	0	0	0.560909	0	0	0	0	0
unc.edu.8f8b493a-366c-4961-9586-bbc80878d91b.1785245.bt.exon_quantification.txt	0	0	0	0	0	0	0	0	0	0	0	0	0	0	0	0	0	0
unc.edu.210a8b68-3413-4b76-94c4-d33559fac3a0.1756221.bt.exon_quantification.txt	0	0	0	0	0	0	0	0	0.115991	0	0	0	0	0	0	0	0	0
unc.edu.e1921d3b-cb2c-4a65-8cd9-07268cc10903.1753962.bt.exon_quantification.txt	0.223797	0.360199	1.75457	0.913839	0	0.832866	0.920229	0.695032	0.553842	1.37076	0.506126	0.9582	0.348129	0	0	0	0	0
unc.edu.116eb411-e34a-4d37-8fce-87b72c902529.1812496.bt.exon_quantification.txt	0	0	0	0	0	0	0.0730748	0.0735894	0.105552	0	0	0	0	0	0	0	0	0
unc.edu.5dce6ab3-c24f-4de9-ba94-6b9589e87735.1785259.bt.exon_quantification.txt	0	0.152398	0	0	0.24207	0.264285	0.175204	0.529314	0.36555	0	0	0	0.176749	0	0.048274	0.0192873	0.0525245	0.0229434
unc.edu.7eb74edd-0e5a-45f6-b0d0-f21c6a897ee7.1756595.bt.exon_quantification.txt	0	0	0	0	0	0	0	0	0	0	0	0	0	0	0	0	0	0
unc.edu.a5790a9d-d7a3-4d26-8df9-0bbae194f638.1756617.bt.exon_quantification.txt	0	0.319008	0	0.607002	0.633393	0	0	0	0.147152	0	0	0	0	0	0	0	0	0
unc.edu.bcf523e4-6976-4f82-8d83-e0d926d0b100.1875318.bt.exon_quantification.txt	0	0	0	0	0	0	0	0	0	0	0	0	0.0881532	0	0	0	0	0
unc.edu.c6312f6d-cc5f-4a05-a9de-e1063505d29b.2041357.bt.exon_quantification.txt	0	0	0	0	0	0	0	0.184431	0.0881791	0	0	0.0847546	0.0923781	0	0	0.0403221	0	0
unc.edu.3b4b2673-e81e-4cad-b4fa-5c1b53e928c4.1756506.bt.exon_quantification.txt	0	0	0	0	0	0	0	0.280977	0.268678	1.66245	0.613827	1.1621	0.844418	0	0	0	0	0
unc.edu.ea7cf4ad-ec51-4734-b75e-aa196c870d24.1861136.bt.exon_quantification.txt	0	0	0	0	0	0	0	0.0621225	0	0	0	0.0856446	0.046674	0.0673389	0.0509907	0.0203727	0	0
unc.edu.75ce6551-1272-43bf-b8f1-b8c5cf0bf525.1756883.bt.exon_quantification.txt	0	0	0	0	0	0	0	0	0	0	0	0	0	0	0	0	0	0
unc.edu.f97f812e-5574-4b75-9b92-3267606f768d.1756609.bt.exon_quantification.txt	0	0	0	0	0	0	0	0	0	0	0	0	0	0	0	0	0	0
unc.edu.66a1db87-e75c-403b-a923-97a0f9cd1720.2148532.bt.exon_quantification.txt	0	0.0242843	0	0	0	0	0.0465308	0.0468584	0.0672111	0	0	0.0646009	0.0704116	0	0	0	0	0
unc.edu.1ad58f0a-39d1-47f2-b3f4-1886552ea154.1756173.bt.exon_quantification.txt	0	0	0	0	0	0	0	0.309827	0	0	0	0.42714	0.93112	0	0	0	0	0
unc.edu.14d89fac-d1b8-41fb-b812-0ba78aa61d90.1754499.bt.exon_quantification.txt	0	0	0	0	0	0	0	0	0	0	0	0	0	0	0	0	0	0
unc.edu.ad28b826-ccfe-406e-a8c1-232702fc2ddd.1756172.bt.exon_quantification.txt	0	0	0	0	0	0.187559	0	0	0.0997786	0	0	0.287711	0	0	0	0	0	0
unc.edu.08ef1929-f4ae-49e5-83c4-b742b48d7e0b.1755411.bt.exon_quantification.txt	0	0	0	0	0	0	0.252844	0.254624	0	0	0	0.351036	0.191305	0	0	0	0	0
unc.edu.523f117f-e6a5-401d-80c4-834a20229618.2224092.bt.exon_quantification.txt	0	0.0487206	0	0	0	0.0844902	0.140029	0.0470051	0.0449477	0	0	0	0	0.0509521	0	0	0	0.0183372
unc.edu.7a9961f7-5d9e-47e6-9ccb-7642f01083d5.1864846.bt.exon_quantification.txt	0	0.139446	0	0	0	0	0.0667977	0.134536	0.0643237	0	0	0	0.05054	0	0.0552143	0.0441204	0.0600759	0.0787258
unc.edu.9043031b-caea-441e-8187-34f63ab36978.1804386.bt.exon_quantification.txt	0	0	0	0	0	0	0	0	0	0	0	0.189601	0.103327	2.60882	1.91902	1.10498	1.35106	1.34127
unc.edu.1618ca7f-6d62-451e-8280-b7199a45cd1d.1756900.bt.exon_quantification.txt	0	0	0	0	0	0	0.295622	0	0	0	0	0	0	0	0	0	0	0
unc.edu.9d186179-08a2-4cc4-b438-66968cca22f8.1756507.bt.exon_quantification.txt	0	0	0	0	0	0	0	0	0	0	0	0	0	0	0	0	0	0
unc.edu.e2a5570a-2ef4-4e5b-9a70-eee96b1aedf9.1865028.bt.exon_quantification.txt	0	0	0	0	0	0.0501821	0	0.0558365	0	0	0	0	0	0	0	0.0183113	0.0498665	0.0871294
unc.edu.91095750-c92e-4dea-a208-ddb8498e504c.1756599.bt.exon_quantification.txt	0	0	0	0	0	0	0	0	0.179187	0	0	0	0	0	0	0	0	0
unc.edu.686ccb58-8cd1-47fb-8dc1-7f67c9a5ddaf.1753584.bt.exon_quantification.txt	0	0	0.413525	0.430755	0	0	0	0	0	0	0	0	0	0	0	0	0	0.0852043
unc.edu.195c3ccb-463b-4a68-ab8e-bcd2e0ce05d5.2305522.bt.exon_quantification.txt	0	0.0389304	0.0711129	0.222228	0.309186	0.202537	0.111891	0	0.0359156	0	0	0	0.0846582	0.0407135	0	0.0123175	0	0.0586095
unc.edu.cbf0b795-ee73-4508-b82d-aab2b21a4f0e.2305508.bt.exon_quantification.txt	0	0	0	0	0	0	0	0	0	0	0	0	0	0	0	0	0	0.0168731
unc.edu.e11b286b-e614-4ab3-8ad0-002a183dcb94.1795335.bt.exon_quantification.txt	0	0	0	0	0	0	0	0	0.0382465	0	0	0	0	0	0	0.0262338	0	0
unc.edu.fc06e31c-f41b-4eb4-a161-a063eda4e713.1756155.bt.exon_quantification.txt	0	0	0	0	0	0	0	0	0	0	0	0	0	0	0	0	0	0
unc.edu.801bb661-2677-48a6-80b9-de57224cf5ef.1744803.bt.exon_quantification.txt	0	0	0	0	0	0	0	0	0	0	0	0	0	0	0	0	0.0362213	0
unc.edu.f686cc71-5307-49cc-a421-27816e0dc7ae.1783344.bt.exon_quantification.txt	0	0	0	0	0	0	0	0	0	0	0	0	0	0	0	0	0.0638035	0
unc.edu.98270d92-be35-42c5-86fa-371dacb19331.2283731.bt.exon_quantification.txt	0	0.0914301	0	0.0869856	0.0907676	0.158556	0.043797	0.132316	0.105437	0	0	0.121611	0.0662748	0	0	0	0	0.0344119
unc.edu.6d731b41-f8d6-489f-a81c-a458b31e9043.1802421.bt.exon_quantification.txt	0	0	0	0	0	0	0	0	0.036558	0	0	0.105415	0.172345	0	0.125523	0	0.136575	0
unc.edu.c18465ae-447d-46c8-8b54-0156ab502265.1754003.bt.exon_quantification.txt	0	0	0	0	0	0	0	0	0	0	0	0	0	0	0	0	0	0
unc.edu.b63c5cf4-5e75-498e-b08f-ceb835b71182.1783626.bt.exon_quantification.txt	0	0.0607436	0	0.115582	0	0.10534	0.290975	0.410233	0.0280198	0	0	0.0807949	0.0440311	0	0	0	0	0.0457246
unc.edu.0031d433-d703-4b2c-9fdf-2920008eb457.1753897.bt.exon_quantification.txt	0	0	0	0	0	0.368085	0.610043	0.409559	0.0979081	0	0	0.282317	0.153856	0	0.168085	0.0671564	0	0
unc.edu.83b694da-5041-4509-9066-60cfce885c7d.1756146.bt.exon_quantification.txt	0	0	0	0	0.517994	0.226213	0	0	0.120342	0	0	0	0	0	0	0	0	0
unc.edu.751f3b6e-a9c0-4ad8-a8af-06b40d67159d.2638735.bt.exon_quantification.txt	0	0.0971204	0	0	0.0964167	0.084212	0.0465227	0	0	0	0.10235	0	0.0703995	0	0	0	0	0.109661
unc.edu.2ff064bb-9e08-497e-a83a-7360cf80f62d.1805515.bt.exon_quantification.txt	0	0	0	0	0	0	0	0	0	0	0	0	0	0	0.0451586	0	0	0
unc.edu.8f01dbbd-6aaa-4efe-a79a-3e32ccbedc90.1972881.bt.exon_quantification.txt	0.25925	0.52853	0.609757	0.846885	1.54649	1.54369	1.49241	1.61027	1.36015	1.27033	1.99344	1.84999	1.97606	0.0581829	0.0440576	0.0176027	0.383495	0.230334
unc.edu.737609fd-fa3f-4716-ba99-f4a8110e16a8.1756121.bt.exon_quantification.txt	0	0	0	0	0	0	0	0	0	0	0	0	0	0	0	0	0	0
unc.edu.a6ce566a-b5c9-4f72-a0d0-1ad705e7cd5f.1869034.bt.exon_quantification.txt	0.0619305	0.265804	0.485535	0.126442	0	0.403332	0.318314	0.192334	0.153262	0.758649	0.420175	0.265159	0.289009	0.0694946	0.0526231	0.0210249	0	0.100042
TCGA RNASeq
exon	2	3	4	5	6	7	8	9	10	11	12	13	14	15	16	17	18	19
UNCID_283648.TCGA-AA-3681-01A-01R-0905-07.100810_UNC2-RDR300275_00019_FC_629FEAAXX.5.trimmed.annotated.translated_to_genomic.exon.quantification.txt	0	0	0	0	0	0.293814	0	0	0.156305	0	0	0	0	0	0	0	0	0
UNCID_236101.TCGA-AA-A01I-01A-02R-A089-07.110426_UNC6-RDR300211_00099_FC_634Y9AAXX.7.trimmed.annotated.translated_to_genomic.exon.quantification.txt	0	0	0	0	0	0	0	0	0	0	0.217554	0.123562	0	0	0	0	0	0
UNCID_286682.TCGA-AA-3520-01A-01R-0821-07.100730_UNC2-RDR300275_00017_FC_629JTAAXX.3.trimmed.annotated.translated_to_genomic.exon.quantification.txt	0	0.0121156	0.436298	0	0	0	0	0.133588	0.0574833	0	0	0	0.158079	0	0	0	0	0
UNCID_411566.TCGA-A6-4107-01A-02R-1410-07.110309_UNC3-RDR300156_00080_FC_62J42AAXX.5.trimmed.annotated.translated_to_genomic.exon.quantification.txt	0.0893972	0	0	0	0	0	0	0	0	0	0	0	0	0	0	0	0	0
UNCID_288944.TCGA-AA-3862-01A-01R-1022-07.100630_UNC1-RDR301647_0010_622MUAAXX.7.trimmed.annotated.translated_to_genomic.exon.quantification.txt	0	0	0	0	0	0	0	0	0	0	0	0	0	0	0	0	0	0
UNCID_286658.TCGA-AA-A024-01A-02R-A00A-07.100730_UNC2-RDR300275_00017_FC_629JTAAXX.7.trimmed.annotated.translated_to_genomic.exon.quantification.txt	0	0	0	0	0	0	0	0	0	0	0	0	0	0	0	0	0	0
UNCID_290882.TCGA-AA-A01F-01A-01R-A002-07.100608_UNC3-RDR300156_0008.6.trimmed.annotated.translated_to_genomic.exon.quantification.txt	0	0	0	0	0	0	0	0	0	0	0	0	0.00267641	0	0	0	0	0
UNCID_288883.TCGA-AA-3821-01A-01R-1022-07.100630_UNC1-RDR301647_0010_622MUAAXX.4.trimmed.annotated.translated_to_genomic.exon.quantification.txt	0	0	0	0	0	0	0	0	0.00345464	1.02603	0.805038	0	0.103146	0	0	0	0	0
UNCID_288123.TCGA-AA-3845-01A-01R-1022-07.100708_UNC8-RDR3001640_0010_62333AAXX.6.trimmed.annotated.translated_to_genomic.exon.quantification.txt	0	0	0	0	0	0	0	0	0	0	0	0	0	0	0	0	0	0
UNCID_288138.TCGA-AA-3844-01A-01R-1022-07.100708_UNC8-RDR3001640_0010_62333AAXX.5.trimmed.annotated.translated_to_genomic.exon.quantification.txt	0	0	0	0	0	0	0	0.170979	0.0354753	0	0	0	0	0	0	0	0	0
UNCID_416313.TCGA-AA-3502-01A-01R-1410-07.110215_UNC3-RDR300156_00072_FC_62J8HAAXX.8.trimmed.annotated.translated_to_genomic.exon.quantification.txt	0	0	0	0	0	0	0	0	0	0	0	0	0	0	0	0	0	0
UNCID_281973.TCGA-AA-3696-01A-01R-0905-07.100813_UNC5-RDR300700_00020_FC_62A20AAXX.4.trimmed.annotated.translated_to_genomic.exon.quantification.txt	0	0	0.505806	1.9758	0	0	0	0	0	0	0	0	0	0	0	0	0	0
UNCID_411533.TCGA-AA-3488-01A-01R-1410-07.110309_UNC3-RDR300156_00080_FC_62J42AAXX.6.trimmed.annotated.translated_to_genomic.exon.quantification.txt	0	0	0	0	0	0	0	0	0	0	0	0	0	0	0	0	0	0.0556159
UNCID_291298.TCGA-AA-A00D-01A-01R-A002-07.100607_UNC1-RDR301647_0006.1.trimmed.annotated.translated_to_genomic.exon.quantification.txt	0	0	0	0	0	0	0	0.55386	0.0871081	0	0.334334	0	0	0	0.110662	0.0466038	0	0
UNCID_283331.TCGA-AA-3848-01A-01R-0905-07.100810_UNC6-RDR300211_00022_FC_629L9AAXX.8.trimmed.annotated.translated_to_genomic.exon.quantification.txt	0	0	0	0	0	0	0.306243	0.204018	0.272216	0	0	0	0.270919	0	0	0	0	0
UNCID_287018.TCGA-AA-3949-01A-01R-1022-07.100723_UNC2-RDR300275_0016_62330AAXX.2.trimmed.annotated.translated_to_genomic.exon.quantification.txt	0	0	0	0	0	0	0	0	0	0	0	0	0	0	0	0	0	0
UNCID_284363.TCGA-AA-3872-01A-01R-1022-07.100809_UNC1-RDR301647_00017_FC_629F8AAXX.5.trimmed.annotated.translated_to_genomic.exon.quantification.txt	0	0.416305	0	0	0.174016	0.417969	0.251897	0.0898419	0.223617	0	0.0461812	0.480867	0.174707	0	0	0	0	0
UNCID_291065.TCGA-AA-A00Z-01A-01R-A002-07.100608_UNC3-RDR300156_0008.5.trimmed.annotated.translated_to_genomic.exon.quantification.txt	0	0	0	0	0	0	0	0	0	0	0	0	0	0	0	0	0	0
UNCID_286654.TCGA-A6-2670-01A-02R-0821-07.100730_UNC2-RDR300275_00017_FC_629JTAAXX.1.trimmed.annotated.translated_to_genomic.exon.quantification.txt	0	0	0	0	0	0	0	0	0	0	0.215706	0.757195	0.92267	0	0	0	0	0
UNCID_281997.TCGA-AA-A00N-01A-02R-A00A-07.100813_UNC5-RDR300700_00020_FC_62A20AAXX.6.trimmed.annotated.translated_to_genomic.exon.quantification.txt	0	0	0	0	0	0	0	0	0.146991	0	0	0	0	0	0	0	0	0
UNCID_282903.TCGA-AA-3555-01A-01R-0821-07.100811_UNC7-RDR3001641_00019_FC_629GAAAXX.6.trimmed.annotated.translated_to_genomic.exon.quantification.txt	0	0	0	0	0	0	0	0	0	0	0	0	0.0239081	0	0	0	0	0
UNCID_281969.TCGA-AA-A01K-01A-01R-A00A-07.100813_UNC5-RDR300700_00020_FC_62A20AAXX.7.trimmed.annotated.translated_to_genomic.exon.quantification.txt	0	0	0	0	0	0	0	0	0	0	0	0	0	0	0	0	0	0
UNCID_285910.TCGA-AA-A01D-01A-01R-A00A-07.100804_UNC6-RDR300211_00021_FC_629PLAAXX.8.trimmed.annotated.translated_to_genomic.exon.quantification.txt	0	0.164835	0.322389	0	0.330587	0.0750726	0	0	0.116741	0.247114	0.554471	0.602375	0	0.0139301	0.189868	0	0	0
UNCID_284340.TCGA-AA-3952-01A-01R-1022-07.100809_UNC1-RDR301647_00017_FC_629F8AAXX.6.trimmed.annotated.translated_to_genomic.exon.quantification.txt	0	0	0	0	0	0	0	0	0.0968002	0	0	0	0.0180136	0.138608	0	0	0	0
UNCID_286706.TCGA-AA-3553-01A-01R-0821-07.100730_UNC2-RDR300275_00017_FC_629JTAAXX.6.trimmed.annotated.translated_to_genomic.exon.quantification.txt	0	0.11876	0	0	0	0	0	0	0.109563	0	0	0	0	0	0	0	0	0
UNCID_278101.TCGA-AA-3854-01A-01R-0905-07.100908_UNC7-RDR3001641_00027_FC_62ER1AAXX.8.trimmed.annotated.translated_to_genomic.exon.quantification.txt	0	0	0	0	0	0	0	0	0	0	0	0	0	0	0	0	0	0
UNCID_414721.TCGA-AA-A02H-01A-01R-A089-07.110224_UNC6-RDR300211_00061_FC_62J3RAAXX.3.trimmed.annotated.translated_to_genomic.exon.quantification.txt	0	0	0	0	0	0	0	0	0	0	0	0	0	0	0	0	0	0
UNCID_287771.TCGA-AA-3979-01A-01R-1022-07.100709_UNC1-RDR301647_0011_6236JAAXX.7.trimmed.annotated.translated_to_genomic.exon.quantification.txt	0	0	0	0	0	0	0	0	0	0	0	0	0	0	0	0	0	0
UNCID_416274.TCGA-A6-2682-01A-01R-1410-07.110215_UNC3-RDR300156_00072_FC_62J8HAAXX.4.trimmed.annotated.translated_to_genomic.exon.quantification.txt	0	0	0	0	0	0	0	0.472114	0.225725	0	0	0.214104	0.172688	0	0	0	0	0
UNCID_291294.TCGA-AA-A00E-01A-01R-A002-07.100607_UNC1-RDR301647_0006.2.trimmed.annotated.translated_to_genomic.exon.quantification.txt	0	0	0	0	0	0	0	0	0	0	0	0	0	0	0	0	0	0.312613
UNCID_283620.TCGA-AA-3875-01A-01R-0905-07.100810_UNC2-RDR300275_00019_FC_629FEAAXX.7.trimmed.annotated.translated_to_genomic.exon.quantification.txt	0	0	0	0	0	0	0	0	0	0	0	0	0	0.365363	0	0	0	0
UNCID_282542.TCGA-AA-3529-01A-02R-0821-07.100813_UNC3-RDR300156_00019_FC_629UPAAXX.8.trimmed.annotated.translated_to_genomic.exon.quantification.txt	0	0	0	0	0	0	0	0	0	0	0	0.369189	0	0	0	0	0	0
UNCID_283251.TCGA-AA-3684-01A-02R-0905-07.100810_UNC6-RDR300211_00022_FC_629L9AAXX.4.trimmed.annotated.translated_to_genomic.exon.quantification.txt	0	0	0	0	0	0.334764	0	0.372484	0	0	0	0	0.556029	0	0	0.122154	0	0
UNCID_287496.TCGA-AA-3851-01A-01R-1022-07.100715_UNC1-RDR301647_0012_62338AAXX.5.trimmed.annotated.translated_to_genomic.exon.quantification.txt	0	0	0	0	0	0	0	0	0.123282	0	0	0	0	0	0	0	0	0
UNCID_290890.TCGA-AA-A00A-01A-01R-A002-07.100608_UNC3-RDR300156_0008.1.trimmed.annotated.translated_to_genomic.exon.quantification.txt	0	0	0	0	0	0	0	0	0	0	0	0	0.186066	0	0	0	0	0
UNCID_278479.TCGA-AY-4070-01A-01R-1113-07.100908_UNC6-RDR300211_00030_FC_62EL4AAXX.5.trimmed.annotated.translated_to_genomic.exon.quantification.txt	0	0	0	0.152997	0.293755	0	0	0	0.0400575	0	0.332169	0.650253	0.0652788	0	0	0	0.210617	0
UNCID_417049.TCGA-AA-A01X-01A-21R-A083-07.110215_UNC2-RDR300275_00051_FC_62J8GAAXX.3.trimmed.annotated.translated_to_genomic.exon.quantification.txt	0	0	0	0	0	0.46273	0.136338	0	0.150435	0	0.412423	0.488986	0.124646	0	0	0.0712915	0	0.0747628
UNCID_278796.TCGA-AA-3695-01A-01R-0905-07.100907_UNC2-RDR300275_00024_FC_62EPYAAXX.7.trimmed.annotated.translated_to_genomic.exon.quantification.txt	0	0	0	0	0	0.819295	0.0309776	0.263431	0.37785	0	0	0.119466	1.48441	0.278037	0.0426763	0	0	0.173081
UNCID_290945.TCGA-AA-A00W-01A-01R-A002-07.100608_UNC3-RDR300156_0008.4.trimmed.annotated.translated_to_genomic.exon.quantification.txt	0	0	0	0	0	0	0	0	0	0	0	0	0	0	0	0	0	0
UNCID_285889.TCGA-AA-A01C-01A-01R-A00A-07.100804_UNC6-RDR300211_00021_FC_629PLAAXX.6.trimmed.annotated.translated_to_genomic.exon.quantification.txt	0	0	0	0	0	0	0	0	0	0	0	0	0	0	0	0	0	0
UNCID_290886.TCGA-AA-A01G-01A-01R-A002-07.100608_UNC3-RDR300156_0008.7.trimmed.annotated.translated_to_genomic.exon.quantification.txt	0	0	0	0	0	0	0	0	0	0	0	0	0.209599	0	0	0	0	0
UNCID_288578.TCGA-AA-3956-01A-02R-1022-07.100701_UNC4-RDR3001561_0011_622TVAAXX.7.trimmed.annotated.translated_to_genomic.exon.quantification.txt	0	0	0	0	0	0	0	0	0	0	0	0	0	0	0	0	0	0
UNCID_279217.TCGA-AA-3531-01A-01R-0821-07.100902_UNC7-RDR3001641_00025_FC_62EPOAAXX.6.trimmed.annotated.translated_to_genomic.exon.quantification.txt	0	0	0	0.459875	0.148925	0	0	0	0	0	0.0175655	0.410146	0	0	0	0	0	0
UNCID_290557.TCGA-AA-A004-01A-01R-A00A-07.100618_UNC5-RDR300700_0009_622TTAAXX.5.trimmed.annotated.translated_to_genomic.exon.quantification.txt	0.292778	0.0116351	0	0	0	0	1.24846	0	0	0	0	0	0	0	0	0	0	0
UNCID_458067.TCGA-AA-A03F-01A-11R-A16W-07.110823_UNC2-RDR300275_00083_FC_631M4AAXX.6.trimmed.annotated.translated_to_genomic.exon.quantification.txt	0	0	0	0	0	0	0	0	0	0	0	0	0	0	0	0	0	0
UNCID_412772.TCGA-A6-2685-01A-01R-1410-07.110302_UNC6-RDR300211_00066_FC_62J5EAAXX.2.trimmed.annotated.translated_to_genomic.exon.quantification.txt	0	0.258244	1.24992	0.0938945	0.0849133	0.8586	0.671313	0.393563	0.424896	0.450693	0.228814	0.520704	0.259924	0	0	0	0	0
UNCID_417066.TCGA-AA-A01P-01A-21R-A083-07.110215_UNC2-RDR300275_00051_FC_62J8GAAXX.1.trimmed.annotated.translated_to_genomic.exon.quantification.txt	0	0	0	0	0	0	0	0	0	0	0	0	0	0	0	0	0	0
UNCID_277469.TCGA-AA-3693-01A-01R-0905-07.100909_UNC4-RDR3001561_00023_FC_62ELHAAXX.4.trimmed.annotated.translated_to_genomic.exon.quantification.txt	0	0	0	0	0	0	0	0	0.089099	0	0.0321406	0.567921	0.0994827	0	0	0.0611141	0	0
UNCID_282994.TCGA-AA-3522-01A-01R-0821-07.100811_UNC7-RDR3001641_00019_FC_629GAAAXX.8.trimmed.annotated.translated_to_genomic.exon.quantification.txt	0	0	0	0	0	0	0	0	0	0	0	0	0	0	0	0	0	0
UNCID_291725.TCGA-AA-3554-01A-01R-0826-07.100603_UNC3-RDR300156_0007_61MM1AAXX.7.trimmed.annotated.translated_to_genomic.exon.quantification.txt	0	0	0	0	0	0	0	0	0	0	0	0	0	0	0	0	0	0
UNCID_414603.TCGA-A6-2679-01A-02R-1410-07.110224_UNC6-RDR300211_00061_FC_62J3RAAXX.4.trimmed.annotated.translated_to_genomic.exon.quantification.txt	0	0	0	0	0	0	0	0	0	0	0	0	0	0	0	0	0	0
UNCID_189065.TCGA-CM-4752-01A-01R-1410-07.110324_UNC6-RDR300211_00088_FC_7090HAAXX.7.trimmed.annotated.translated_to_genomic.exon.quantification.txt	0	0	0	0	0	0	0	0	0	0	0	0	0	0	0	0	0.17686	0.00662182
UNCID_430384.TCGA-CM-4748-01A-01R-1410-07.110817_UNC6-RDR300211_00122_FC_6315AAXX.6.trimmed.annotated.translated_to_genomic.exon.quantification.txt	0	0	0	0	0	0	0	0	0	0	0	0	0.199109	0	0	0.44034	0	0
UNCID_281276.TCGA-AA-3986-01A-02R-1022-07.100816_UNC7-RDR3001641_00020_FC_629FWAAXX.8.trimmed.annotated.translated_to_genomic.exon.quantification.txt	0	0	0	0	0	0	0	0	0.123041	0.415262	0.255546	0	0	0	0.00960144	0	0	0
UNCID_288951.TCGA-AA-3861-01A-01R-1022-07.100630_UNC1-RDR301647_0010_622MUAAXX.6.trimmed.annotated.translated_to_genomic.exon.quantification.txt	0	0	0	0	0	0	0	0	0	0	0	0	0	0	0	0	0	0
UNCID_291745.TCGA-AA-3525-01A-02R-0826-07.100603_UNC3-RDR300156_0007_61MM1AAXX.5.trimmed.annotated.translated_to_genomic.exon.quantification.txt	0	0	0	0	0	0	0	0	0	0	0	0	0	0	0	0	0	0
UNCID_291742.TCGA-AA-3518-01A-02R-0826-07.100603_UNC3-RDR300156_0007_61MM1AAXX.4.trimmed.annotated.translated_to_genomic.exon.quantification.txt	0	0	0	0	0	0.178457	0.0525803	0	0	0	0	0	0	0	0	0	0	0
UNCID_282993.TCGA-AA-3534-01A-01R-0821-07.100811_UNC7-RDR3001641_00019_FC_629GAAAXX.5.trimmed.annotated.translated_to_genomic.exon.quantification.txt	0	0	0	0	0	0	0	0	0.126442	0	0	0	0	0	0	0	0	0
UNCID_283646.TCGA-AA-3680-01A-01R-0905-07.100810_UNC2-RDR300275_00019_FC_629FEAAXX.4.trimmed.annotated.translated_to_genomic.exon.quantification.txt	0	0	0	0	0	0	0	0	0	0	0	0	0	0	0	0	0	0
UNCID_418391.TCGA-AZ-4684-01A-01R-1410-07.110215_UNC1-RDR301647_00040_FC_639J5AAXX.6.trimmed.annotated.translated_to_genomic.exon.quantification.txt	0	0	0	0	0	0	0	0	0	0	0	0.321159	0	0	0	0	0	0
UNCID_278438.TCGA-AA-3552-01A-01R-0821-07.100908_UNC6-RDR300211_00030_FC_62EL4AAXX.8.trimmed.annotated.translated_to_genomic.exon.quantification.txt	0	0	0	0	0	0	0	0	0	0	0	0	0	0	0	0	0	0
UNCID_291743.TCGA-A6-2676-01A-01R-0826-07.100603_UNC3-RDR300156_0007_61MM1AAXX.2.trimmed.annotated.translated_to_genomic.exon.quantification.txt	0	0	0	0	0	0	0	0	0	0	0	0	0	0	0	0	0	0.101996
UNCID_189161.TCGA-CM-4750-01A-01R-1410-07.110324_UNC6-RDR300211_00088_FC_7090HAAXX.6.trimmed.annotated.translated_to_genomic.exon.quantification.txt	0	0	0	0	0	0	0	0	0	0	0	0	0	0	0	0	0	0
UNCID_291254.TCGA-AA-A00F-01A-01R-A002-07.100607_UNC1-RDR301647_0006.3.trimmed.annotated.translated_to_genomic.exon.quantification.txt	0	0.165164	0	0	0	0	0	0	0.0380935	0.53875	0.256942	0	0	0	0.165051	0	0.182972	0.0325618
UNCID_287450.TCGA-AA-3710-01A-01R-1022-07.100715_UNC1-RDR301647_0012_62338AAXX.2.trimmed.annotated.translated_to_genomic.exon.quantification.txt	0	0	0	0	0	0	0	0	0	0	0	0.186296	0.524095	0	0	0	0	0
UNCID_283232.TCGA-AA-3667-01A-01R-0905-07.100810_UNC6-RDR300211_00022_FC_629L9AAXX.2.trimmed.annotated.translated_to_genomic.exon.quantification.txt	0	0	0	0	0	0	0.433304	0	0	0	0	0	0	0	0	0	0	0
UNCID_286986.TCGA-AA-3972-01A-01R-1022-07.100723_UNC2-RDR300275_0016_62330AAXX.5.trimmed.annotated.translated_to_genomic.exon.quantification.txt	0	0	0	0	0	0	0	0	0	0	0	0	0	0	0	0	0	0
UNCID_291261.TCGA-AA-A00J-01A-02R-A002-07.100607_UNC1-RDR301647_0006.4.trimmed.annotated.translated_to_genomic.exon.quantification.txt	0	0	0	0	0	0	0	0	0	0	0	0	0	0	0	0	0	0
UNCID_412756.TCGA-CA-5256-01A-01R-1410-07.110302_UNC6-RDR300211_00066_FC_62J5EAAXX.7.trimmed.annotated.translated_to_genomic.exon.quantification.txt	0	0	0	0	0	0	0	0	0	0	0	0	0	0	0	0	0	0
UNCID_282027.TCGA-AA-3519-01A-02R-0821-07.100813_UNC5-RDR300700_00020_FC_62A20AAXX.3.trimmed.annotated.translated_to_genomic.exon.quantification.txt	0	0	0	0	0	0	0	0	0	0	0	0	0	0	0	0	0	0
UNCID_282526.TCGA-AA-3524-01A-02R-0821-07.100813_UNC3-RDR300156_00019_FC_629UPAAXX.4.trimmed.annotated.translated_to_genomic.exon.quantification.txt	0	0	0	0	0	0	0	0	0	0	0	0	0	0	0	0	0	0
UNCID_416273.TCGA-AZ-4315-01A-01R-1410-07.110215_UNC3-RDR300156_00072_FC_62J8HAAXX.5.trimmed.annotated.translated_to_genomic.exon.quantification.txt	0	0	0	0	0	0	0	0	0	0	0	0	0	0	0	0	0	0
UNCID_291375.TCGA-AA-A00U-01A-01R-A002-07.100607_UNC1-RDR301647_0006.7.trimmed.annotated.translated_to_genomic.exon.quantification.txt	0	0	0	0	0	0	0	0	0	0	0	0	0	0	0	0	0	0
UNCID_283219.TCGA-AA-3672-01A-01R-0905-07.100810_UNC6-RDR300211_00022_FC_629L9AAXX.3.trimmed.annotated.translated_to_genomic.exon.quantification.txt	0	0	0	0	0	0	0	0	0	0	0	0	0	0	0	0	0	0
UNCID_286659.TCGA-A6-2674-01A-02R-0821-07.100730_UNC2-RDR300275_00017_FC_629JTAAXX.2.trimmed.annotated.translated_to_genomic.exon.quantification.txt	0	0	0	0	0	0	0	0	0	0	0	0	0	0	0	0	0.0851039	1.17365
UNCID_416354.TCGA-AA-3492-01A-01R-1410-07.110215_UNC3-RDR300156_00072_FC_62J8HAAXX.6.trimmed.annotated.translated_to_genomic.exon.quantification.txt	0	0	0	0	0	0.469665	0	0	0	0	0	0	0	0	0	0	0	0
UNCID_287028.TCGA-AA-3984-01A-02R-1022-07.100723_UNC2-RDR300275_0016_62330AAXX.8.trimmed.annotated.translated_to_genomic.exon.quantification.txt	0	0	0	0	0	0	0	0	0	0	0	0	0	0	0	0	0	0
UNCID_283332.TCGA-AA-3715-01A-01R-0905-07.100810_UNC6-RDR300211_00022_FC_629L9AAXX.5.trimmed.annotated.translated_to_genomic.exon.quantification.txt	0	0	0	0	0	0	0	0.360758	0	0	0	0.399193	0.866632	0	0	0	0	0
UNCID_287492.TCGA-AA-3850-01A-01R-1022-07.100715_UNC1-RDR301647_0012_62338AAXX.4.trimmed.annotated.translated_to_genomic.exon.quantification.txt	0	0	0	0	0	0	0.521247	0.262459	0.125486	0	0	0	0	0	0	0	0	0
UNCID_418357.TCGA-AA-A00O-01A-02R-A089-07.110215_UNC1-RDR301647_00040_FC_639J5AAXX.2.trimmed.annotated.translated_to_genomic.exon.quantification.txt	0	0	0	0	0	0.2156	0	0.0505039	0.291269	0	0.131019	0	0.578657	0	0	0	0	0
UNCID_285958.TCGA-AA-A02R-01A-01R-A00A-07.100804_UNC6-RDR300211_00021_FC_629PLAAXX.7.trimmed.annotated.translated_to_genomic.exon.quantification.txt	0	0	0	0	0	0	0.130816	0.118564	0	0	0	0.118052	0.311779	0	0	0	0	0
UNCID_277472.TCGA-AA-3856-01A-01R-0905-07.100909_UNC4-RDR3001561_00023_FC_62ELHAAXX.3.trimmed.annotated.translated_to_genomic.exon.quantification.txt	0	0	0	0	0	0	0	0	0	0	0	0	0	0	0	0	0	0
UNCID_282014.TCGA-AA-A02E-01A-01R-A00A-07.100813_UNC5-RDR300700_00020_FC_62A20AAXX.5.trimmed.annotated.translated_to_genomic.exon.quantification.txt	0	0	0	0	0	0	0	0	0	0	0	0	0	0	0	0	0	0
UNCID_287030.TCGA-AA-3971-01A-01R-1022-07.100723_UNC2-RDR300275_0016_62330AAXX.4.trimmed.annotated.translated_to_genomic.exon.quantification.txt	0	0	0	0.362503	0.164153	0	0	0.221953	0.0198973	0	0	0	0	0	0	0.0329821	0.0154861	0
UNCID_287746.TCGA-AA-3977-01A-01R-1022-07.100709_UNC1-RDR301647_0011_6236JAAXX.6.trimmed.annotated.translated_to_genomic.exon.quantification.txt	0	0	0	0	0	0	0	0	0	0	0	0	0	0	0	0	0	0
UNCID_291724.TCGA-AA-3543-01A-01R-0826-07.100603_UNC3-RDR300156_0007_61MM1AAXX.6.trimmed.annotated.translated_to_genomic.exon.quantification.txt	0	0	0	0	0	0.10376	0.166755	0	0	0	0	0	0	0	0	0	0	0
UNCID_288559.TCGA-AA-3976-01A-01R-1022-07.100701_UNC4-RDR3001561_0011_622TVAAXX.8.trimmed.annotated.translated_to_genomic.exon.quantification.txt	0	0	0	0	0	0	0	0	0	0	0	0	0	0	0.862597	0	0	0
UNCID_278787.TCGA-AA-3679-01A-02R-0905-07.100907_UNC2-RDR300275_00024_FC_62EPYAAXX.8.trimmed.annotated.translated_to_genomic.exon.quantification.txt	0	0	0	0	0.0664407	0.286007	0	0	0	0	0	0	0	0	0.575417	0	0	0
UNCID_278105.TCGA-AA-3814-01A-01R-0905-07.100908_UNC7-RDR3001641_00027_FC_62ER1AAXX.3.trimmed.annotated.translated_to_genomic.exon.quantification.txt	0	0	0	0	0.24877	0.103069	0.212371	0.0216966	0.112626	0	0	0	0.176984	0	0	0	0	0
UNCID_278786.TCGA-AA-3833-01A-01R-0905-07.100907_UNC2-RDR300275_00024_FC_62EPYAAXX.6.trimmed.annotated.translated_to_genomic.exon.quantification.txt	0	0	0	0	0	0	0.178731	0.0935946	0	0	0	0.272955	0.0567967	0	0	0	0	0
UNCID_188715.TCGA-CM-4746-01A-01R-1410-07.110324_UNC6-RDR300211_00088_FC_7090HAAXX.5.trimmed.annotated.translated_to_genomic.exon.quantification.txt	0	0	0	0	0	0	0.184964	0.05367	0	0	0	0	0	0	0	0	0	0
UNCID_279175.TCGA-A6-2683-01A-01R-0821-07.100902_UNC7-RDR3001641_00025_FC_62EPOAAXX.1.trimmed.annotated.translated_to_genomic.exon.quantification.txt	0	0	0	0	0	0	0	0.073873	0.0925041	0	0	0	0	0	0	0	0	0
UNCID_279219.TCGA-AA-3514-01A-02R-0821-07.100902_UNC7-RDR3001641_00025_FC_62EPOAAXX.3.trimmed.annotated.translated_to_genomic.exon.quantification.txt	0	0	0	0	0	0.285939	1.19133	1.02076	0.231343	0	0	0	0.859047	0	0	0	0	0
UNCID_283262.TCGA-AA-3841-01A-01R-0905-07.100810_UNC6-RDR300211_00022_FC_629L9AAXX.7.trimmed.annotated.translated_to_genomic.exon.quantification.txt	0	0	0	0	0	0	1.15353	1.01824	0.26056	0	0	0	0	0	0	0	0	0
UNCID_414996.TCGA-AA-A01S-01A-21R-A083-07.110224_UNC6-RDR300211_00061_FC_62J3RAAXX.6.trimmed.annotated.translated_to_genomic.exon.quantification.txt	0	0	0	0	0	0	0	0	0	0	0	0	0	0	0	0	0	0
UNCID_416954.TCGA-AA-A01Z-01A-11R-A083-07.110215_UNC2-RDR300275_00051_FC_62J8GAAXX.4.trimmed.annotated.translated_to_genomic.exon.quantification.txt	0	0.156311	0	0.226982	0.383861	0	0	0	0	0	0	0	0	0	0	0	0	0
UNCID_287495.TCGA-AA-3811-01A-01R-1022-07.100715_UNC1-RDR301647_0012_62338AAXX.3.trimmed.annotated.translated_to_genomic.exon.quantification.txt	0	0	0	0	0	0	0	0	0	0	0	0	0	0	0	0	0	0
UNCID_418247.TCGA-AZ-4313-01A-01R-1410-07.110215_UNC1-RDR301647_00040_FC_639J5AAXX.4.trimmed.annotated.translated_to_genomic.exon.quantification.txt	0	0	0	0	0	0	0	0	0	0	0	0	0	0	0	0	0	0
UNCID_282589.TCGA-AA-3517-01A-01R-0821-07.100813_UNC3-RDR300156_00019_FC_629UPAAXX.7.trimmed.annotated.translated_to_genomic.exon.quantification.txt	0	0	0	0	0	0.141348	0.0911022	0	0	0	0	0	0	0	0	0	0	0
UNCID_416330.TCGA-AA-3495-01A-01R-1410-07.110215_UNC3-RDR300156_00072_FC_62J8HAAXX.7.trimmed.annotated.translated_to_genomic.exon.quantification.txt	0	0	0	0	0	0	0	0	0	0	0	0	0	0	0	0	0	0
UNCID_278116.TCGA-AA-A02W-01A-01R-A00A-07.100908_UNC7-RDR3001641_00027_FC_62ER1AAXX.2.trimmed.annotated.translated_to_genomic.exon.quantification.txt	0	0	0	0	0	0	0	0.225995	0	0	0	0	0	0	0	0	0	0
UNCID_284387.TCGA-AA-3815-01A-01R-1022-07.100809_UNC1-RDR301647_00017_FC_629F8AAXX.3.trimmed.annotated.translated_to_genomic.exon.quantification.txt	0	0	0	0	0	0	0	0	0	0	0	0	0	0	0	0	0	0
UNCID_417050.TCGA-AA-A01V-01A-23R-A083-07.110215_UNC2-RDR300275_00051_FC_62J8GAAXX.2.trimmed.annotated.translated_to_genomic.exon.quantification.txt	0	0	0	0	0	0	0	0	0.112016	0	0	0	0	0	0	0	0	0
UNCID_287029.TCGA-AA-3982-01A-02R-1022-07.100723_UNC2-RDR300275_0016_62330AAXX.7.trimmed.annotated.translated_to_genomic.exon.quantification.txt	0	0	0	0	0	0	0	0	0.260303	0.498775	0.375999	0.39224	0.694062	0	0	0	0	0
UNCID_286979.TCGA-AA-3950-01A-02R-1022-07.100723_UNC2-RDR300275_0016_62330AAXX.3.trimmed.annotated.translated_to_genomic.exon.quantification.txt	0	0	0	0	0	0	0.0978664	0.418861	0.0510476	0	0	0	0	0	0	0	0	0
UNCID_278108.TCGA-AA-3688-01A-01R-0905-07.100908_UNC7-RDR3001641_00027_FC_62ER1AAXX.6.trimmed.annotated.translated_to_genomic.exon.quantification.txt	0	0	0	0	0	0	0	0	0.102779	0	0	0	0.16151	0	0	0	0	0
UNCID_418269.TCGA-AA-A010-01A-01R-A089-07.110215_UNC1-RDR301647_00040_FC_639J5AAXX.3.trimmed.annotated.translated_to_genomic.exon.quantification.txt	0	0	0	0	0	0	0	0	0	0	0	0	0	0	0	0	0	0
UNCID_291739.TCGA-AA-3516-01A-02R-0826-07.100603_UNC3-RDR300156_0007_61MM1AAXX.3.trimmed.annotated.translated_to_genomic.exon.quantification.txt	0	0	0	0	0	0	0	0	0	0	0	0	0	0	0	0	0	0
UNCID_291042.TCGA-AA-A00L-01A-01R-A002-07.100608_UNC3-RDR300156_0008.3.trimmed.annotated.translated_to_genomic.exon.quantification.txt	0	0	0	0	0	0.2424	0	0	0	0	0	0	0	0	0	0	0	0
UNCID_274150.TCGA-AA-3870-01A-01R-1022-07.101015_UNC6-RDR300211_00037_FC_707YUAAXX.7.trimmed.annotated.translated_to_genomic.exon.quantification.txt	0.104575	0	0	0	0	0	0	0	0.130921	0.904266	0.653854	0	0	0	0	0	0	0
UNCID_282533.TCGA-AA-3538-01A-01R-0821-07.100813_UNC3-RDR300156_00019_FC_629UPAAXX.1.trimmed.annotated.translated_to_genomic.exon.quantification.txt	0	0	0	0	0	0	0.159697	0.533928	0.0184539	0	0	0	0	0	0	0	0	0
UNCID_412600.TCGA-AA-3506-01A-01R-1410-07.110302_UNC6-RDR300211_00066_FC_62J5EAAXX.3.trimmed.annotated.translated_to_genomic.exon.quantification.txt	0	0	0	0	0	0	0	0	0	0	0	0.723177	0	0	0	0	0	0
UNCID_284389.TCGA-AA-3855-01A-01R-1022-07.100809_UNC1-RDR301647_00017_FC_629F8AAXX.4.trimmed.annotated.translated_to_genomic.exon.quantification.txt	0.0589952	0	0.542961	0.230423	0	0	0	0	0	0	0	0	0	0	0	0	0	0
UNCID_411613.TCGA-A6-2671-01A-01R-1410-07.110309_UNC3-RDR300156_00080_FC_62J42AAXX.2.trimmed.annotated.translated_to_genomic.exon.quantification.txt	0.122848	0.222621	0	0	0	0.0177793	0.232924	0.175217	0.078369	0.401304	0.277826	0.296107	0.084932	0	0	0	0	0
UNCID_283645.TCGA-AA-3666-01A-02R-0905-07.100810_UNC2-RDR300275_00019_FC_629FEAAXX.3.trimmed.annotated.translated_to_genomic.exon.quantification.txt	0	0	0	0	0	0	0	0	0	0	0	0	0	0	0	0	0	0
UNCID_288824.TCGA-AA-3842-01A-01R-1022-07.100630_UNC1-RDR301647_0010_622MUAAXX.5.trimmed.annotated.translated_to_genomic.exon.quantification.txt	0	0	0	0	0	0	0	0	0	0	0	0	0	0	0	0	0	0
UNCID_412565.TCGA-AZ-4615-01A-01R-1410-07.110302_UNC6-RDR300211_00066_FC_62J5EAAXX.6.trimmed.annotated.translated_to_genomic.exon.quantification.txt	0	0	0	0	0	0	0	0	0	0	0	0	0	0	0	0	0	0
UNCID_278115.TCGA-AA-3673-01A-01R-0905-07.100908_UNC7-RDR3001641_00027_FC_62ER1AAXX.5.trimmed.annotated.translated_to_genomic.exon.quantification.txt	0	0	0.307672	0.0723692	0	0	0	0	0	0	0.00572591	0.271008	0.106338	0	0	0	0	0
UNCID_415106.TCGA-AZ-4308-01A-01R-1410-07.110224_UNC6-RDR300211_00061_FC_62J3RAAXX.7.trimmed.annotated.translated_to_genomic.exon.quantification.txt	0	0	0	0	0	0	0.489056	0.73875	0.235471	0	0	0	0.370027	0	0	0	0	0
UNCID_277468.TCGA-AA-3692-01A-01R-0905-07.100909_UNC4-RDR3001561_00023_FC_62ELHAAXX.1.trimmed.annotated.translated_to_genomic.exon.quantification.txt	0	0	0	0.302094	0.0840609	0	0.0785866	0.0433994	0	0	0	0.144301	0.120838	0	0	0	0	0
UNCID_288173.TCGA-AA-3530-01A-01R-1022-07.100708_UNC8-RDR3001640_0010_62333AAXX.4.trimmed.annotated.translated_to_genomic.exon.quantification.txt	0	0	0	0	0	0	0	0	0.126665	0	0.464534	0.0720866	0	0	0	0	0.236601	0
UNCID_287841.TCGA-AA-3866-01A-01R-1022-07.100709_UNC1-RDR301647_0011_6236JAAXX.1.trimmed.annotated.translated_to_genomic.exon.quantification.txt	0	0	0	0	0	0	0	0	0	0	0	0	0	0	0	0	0	0
UNCID_518368.TCGA-AA-3544-01A-01R-1873-07.110831_UNC6-RDR300211_00124_FC_634GWAAXX.1.trimmed.annotated.translated_to_genomic.exon.quantification.txt	0	0	0	0	0	0.232369	0	0	0	0	0	0	0	0	0	0	0	0
UNCID_288174.TCGA-AA-3864-01A-01R-1022-07.100708_UNC8-RDR3001640_0010_62333AAXX.8.trimmed.annotated.translated_to_genomic.exon.quantification.txt	0	0	0	0	0	0	0	0	0	0	0	0	0	0	0	0.163009	0	0
UNCID_418432.TCGA-A6-2684-01A-01R-1410-07.110215_UNC1-RDR301647_00040_FC_639J5AAXX.5.trimmed.annotated.translated_to_genomic.exon.quantification.txt	0	0	0	0	0	0.228537	0.179415	0.836474	0	0	0	0.350572	0.0150831	0	0	0	0	0.0770108
UNCID_282537.TCGA-A6-2678-01A-01R-0821-07.100813_UNC3-RDR300156_00019_FC_629UPAAXX.3.trimmed.annotated.translated_to_genomic.exon.quantification.txt	0	0	0	0	0	0.202246	0	0	0.107592	0	0	0.285749	0.0133479	0	0	0	0	0
UNCID_418350.TCGA-CM-4747-01A-01R-1410-07.110215_UNC1-RDR301647_00040_FC_639J5AAXX.7.trimmed.annotated.translated_to_genomic.exon.quantification.txt	0	0	0	0.401141	0.819722	0	0	0	0.46192	0	0	0	0	0	0	0	0	0
UNCID_283632.TCGA-AA-3664-01A-01R-0905-07.100810_UNC2-RDR300275_00019_FC_629FEAAXX.2.trimmed.annotated.translated_to_genomic.exon.quantification.txt	0	0	0	0	0	0	0	0	0	0	0	0.159611	0.142654	0	0	0	0	0
UNCID_283589.TCGA-AA-A029-01A-01R-A00A-07.100810_UNC2-RDR300275_00019_FC_629FEAAXX.8.trimmed.annotated.translated_to_genomic.exon.quantification.txt	0	0	0	0	0	0	0	0	0	0	0	0	0	0	0	0	0	0
UNCID_458800.TCGA-AA-A02O-01A-21R-A16W-07.110823_UNC2-RDR300275_00083_FC_631M4AAXX.3.trimmed.annotated.translated_to_genomic.exon.quantification.txt	0	0	0	0	0	0	0	0	0	0	0	0	0.225098	0	0	0	0	0
UNCID_282531.TCGA-AA-3560-01A-01R-0821-07.100813_UNC3-RDR300156_00019_FC_629UPAAXX.5.trimmed.annotated.translated_to_genomic.exon.quantification.txt	0	0	0	0	0	0.0337391	0	0.0291983	0	0	0	0.189769	0.134758	0	0	0	0	0
UNCID_288572.TCGA-AA-3930-01A-01R-1022-07.100701_UNC4-RDR3001561_0011_622TVAAXX.5.trimmed.annotated.translated_to_genomic.exon.quantification.txt	0	0	0	0	0	0	0.347349	0	0	0	0	0	0	0	0	0	0	0
UNCID_411513.TCGA-A6-2681-01A-01R-1410-07.110309_UNC3-RDR300156_00080_FC_62J42AAXX.4.trimmed.annotated.translated_to_genomic.exon.quantification.txt	0	0	0	0	0	0.36211	0.500857	0.459617	0.105594	0	0	0.312708	0.170418	0	0.115137	0.028384	0	0
UNCID_415153.TCGA-AA-A01R-01A-21R-A083-07.110224_UNC6-RDR300211_00061_FC_62J3RAAXX.5.trimmed.annotated.translated_to_genomic.exon.quantification.txt	0	0	0	0	0	0	0.231239	0	0	0	0	0	0	0	0	0	0	0
UNCID_278376.TCGA-AY-4071-01A-01R-1113-07.100908_UNC6-RDR300211_00030_FC_62EL4AAXX.6.trimmed.annotated.translated_to_genomic.exon.quantification.txt	0	0	0	0	0	0	0.468631	0.17387	0.255326	0	0	0	0	0	0	0	0	0
UNCID_287489.TCGA-AA-3867-01A-01R-1022-07.100715_UNC1-RDR301647_0012_62338AAXX.6.trimmed.annotated.translated_to_genomic.exon.quantification.txt	0.28475	0	0	0	0	0.0348587	0.2542	0	0.0890128	0	0.237253	0	0	0	0	0	0	0
UNCID_288125.TCGA-AA-3846-01A-01R-1022-07.100708_UNC8-RDR3001640_0010_62333AAXX.7.trimmed.annotated.translated_to_genomic.exon.quantification.txt	0	0	0	0	0	0	0	0	0	0	0	0	0	0	0	0	0	0
UNCID_414947.TCGA-AA-A02F-01A-01R-A089-07.110224_UNC6-RDR300211_00061_FC_62J3RAAXX.2.trimmed.annotated.translated_to_genomic.exon.quantification.txt	0	0	0	0	0.0203284	0.216022	0	0	0	0	0.0719314	0.644589	0	0	0	0	0	0.052664
UNCID_458207.TCGA-AA-A03J-01A-21R-A16W-07.110823_UNC2-RDR300275_00083_FC_631M4AAXX.4.trimmed.annotated.translated_to_genomic.exon.quantification.txt	0	0	0	0	0	0	0	0	0.119804	0	0	0	0	0	0	0	0	0
UNCID_287776.TCGA-AA-3980-01A-02R-1022-07.100709_UNC1-RDR301647_0011_6236JAAXX.8.trimmed.annotated.translated_to_genomic.exon.quantification.txt	0	0	0	0	0	0	0	0	0	0	0	0	0	0	0	0	0	0
UNCID_518369.TCGA-AA-3548-01A-01R-1873-07.110831_UNC6-RDR300211_00124_FC_634GWAAXX.2.trimmed.annotated.translated_to_genomic.exon.quantification.txt	0	0	0	0	0	0	0	0	0	0	0	0	0	0	0	0	0	0
UNCID_286993.TCGA-AA-3947-01A-01R-1022-07.100723_UNC2-RDR300275_0016_62330AAXX.1.trimmed.annotated.translated_to_genomic.exon.quantification.txt	0	0	0	0	0	0	0	0	0	0	0	0	0	0	0	0	0	0
UNCID_291744.TCGA-A6-2672-01A-01R-0826-07.100603_UNC3-RDR300156_0007_61MM1AAXX.1.trimmed.annotated.translated_to_genomic.exon.quantification.txt	0	0.130321	0	0	0	0	0	0	0	0	0	0	0.315715	0	0	0	0	0
UNCID_458243.TCGA-AA-3542-01A-02R-1873-07.110823_UNC2-RDR300275_00083_FC_631M4AAXX.8.trimmed.annotated.translated_to_genomic.exon.quantification.txt	0	0	0	0	0	0	0	0	0	0	0	0	0	0	0	0	0	0
UNCID_290891.TCGA-AA-A00K-01A-02R-A002-07.100608_UNC3-RDR300156_0008.2.trimmed.annotated.translated_to_genomic.exon.quantification.txt	0	0.141759	0	0.134868	0	0	0.139385	0.133168	0.130781	0	0	0	0	0	0	0	0	0
UNCID_288922.TCGA-A6-3808-01A-01R-1022-07.100630_UNC1-RDR301647_0010_622MUAAXX.3.trimmed.annotated.translated_to_genomic.exon.quantification.txt	0	0.315691	0	0.403094	0.206186	0	0	0	0.145622	0	0	0	0.0511865	0	0	0	0	0
UNCID_288624.TCGA-AA-3955-01A-02R-1022-07.100701_UNC4-RDR3001561_0011_622TVAAXX.6.trimmed.annotated.translated_to_genomic.exon.quantification.txt	0	0	0	0	0	0	0	0	0.172799	0	0	0	0	0	0	0	0	0
UNCID_287785.TCGA-AA-3968-01A-01R-1022-07.100709_UNC1-RDR301647_0011_6236JAAXX.4.trimmed.annotated.translated_to_genomic.exon.quantification.txt	0	0.2178	0.113671	0	0	0	0	0	0.0075539	0	0	0	0.0522298	0	0	0	0	0
UNCID_412773.TCGA-AZ-4614-01A-01R-1410-07.110302_UNC6-RDR300211_00066_FC_62J5EAAXX.5.trimmed.annotated.translated_to_genomic.exon.quantification.txt	0	0	0	0	0	0	0	0	0	0	0	0	0	0	0	0	0	0
UNCID_284315.TCGA-AA-3975-01A-01R-1022-07.100809_UNC1-RDR301647_00017_FC_629F8AAXX.7.trimmed.annotated.translated_to_genomic.exon.quantification.txt	0	0.125469	0	0	0	0	0.218267	0.022299	0.0868148	0	0.132226	0.311814	0.368582	0	0	0.0793964	0	0
UNCID_287831.TCGA-AA-3941-01A-01R-1022-07.100709_UNC1-RDR301647_0011_6236JAAXX.3.trimmed.annotated.translated_to_genomic.exon.quantification.txt	0	0	0	0	0	0	0	0	0	0	0	0	0	0	0	0	0	0
UNCID_286683.TCGA-AA-A02J-01A-01R-A00A-07.100730_UNC2-RDR300275_00017_FC_629JTAAXX.8.trimmed.annotated.translated_to_genomic.exon.quantification.txt	0	0	0	0	0	0	0	0	0	0	0	0	0	0	0	0	0	0
UNCID_412563.TCGA-CK-4951-01A-01R-1410-07.110302_UNC6-RDR300211_00066_FC_62J5EAAXX.8.trimmed.annotated.translated_to_genomic.exon.quantification.txt	0	0.110185	0	0	0	0	0.211124	0	0	0	0	0	0	0	0	0	0	0
UNCID_278456.TCGA-AA-3994-01A-01R-1113-07.100908_UNC6-RDR300211_00030_FC_62EL4AAXX.4.trimmed.annotated.translated_to_genomic.exon.quantification.txt	0	0.133283	0	0	0	0	0	0	0	0	0	0	0	0	0	0	0	0
UNCID_277457.TCGA-AA-3678-01A-01R-0905-07.100909_UNC4-RDR3001561_00023_FC_62ELHAAXX.5.trimmed.annotated.translated_to_genomic.exon.quantification.txt	0	0	0	0	0	0	0	0	0	0	0	0	0	0	0	0	0	0
UNCID_277448.TCGA-AA-3831-01A-01R-0905-07.100909_UNC4-RDR3001561_00023_FC_62ELHAAXX.6.trimmed.annotated.translated_to_genomic.exon.quantification.txt	0	0.108428	0	0	0	0	0	0	0.100031	0	0	0	0.157192	0	0	0	0	0
UNCID_291264.TCGA-AA-A00R-01A-01R-A002-07.100607_UNC1-RDR301647_0006.6.trimmed.annotated.translated_to_genomic.exon.quantification.txt	0	0	0	0	0	0	0	0	0	0	0	0	0	0	0	0	0	0
UNCID_279121.TCGA-AA-3527-01A-01R-0821-07.100902_UNC7-RDR3001641_00025_FC_62EPOAAXX.4.trimmed.annotated.translated_to_genomic.exon.quantification.txt	0	0	0	0	0	0	0	0	0	0	0	0	0	0	0	0	0	0
UNCID_288181.TCGA-A6-3809-01A-01R-1022-07.100708_UNC8-RDR3001640_0010_62333AAXX.2.trimmed.annotated.translated_to_genomic.exon.quantification.txt	0	0	0	0	0	0	0	0	0	0	0	0	0	0	0	0	0	0
UNCID_411611.TCGA-A6-2680-01A-01R-1410-07.110309_UNC3-RDR300156_00080_FC_62J42AAXX.3.trimmed.annotated.translated_to_genomic.exon.quantification.txt	0	0	0	0	0	0	0	0	0.310559	0	0	0	0.0838016	0.149353	0.409292	0	0	0
UNCID_282532.TCGA-AA-3556-01A-01R-0821-07.100813_UNC3-RDR300156_00019_FC_629UPAAXX.2.trimmed.annotated.translated_to_genomic.exon.quantification.txt	0	0	0	0	0	0	0	0	0	0	0	0	0	0	0	0	0	0
UNCID_286707.TCGA-AA-3532-01A-01R-0821-07.100730_UNC2-RDR300275_00017_FC_629JTAAXX.5.trimmed.annotated.translated_to_genomic.exon.quantification.txt	0	0	0	0	0	0	0.0386953	0.188844	0	0	0	0	0	0	0	0	0	0
UNCID_277473.TCGA-AA-3819-01A-01R-0905-07.100909_UNC4-RDR3001561_00023_FC_62ELHAAXX.2.trimmed.annotated.translated_to_genomic.exon.quantification.txt	0	0	0	0	0	0.180909	0	0.0768093	0.0595176	0	0	0	0	0	0	0.066013	0	0
UNCID_411614.TCGA-AA-3494-01A-01R-1410-07.110309_UNC3-RDR300156_00080_FC_62J42AAXX.7.trimmed.annotated.translated_to_genomic.exon.quantification.txt	0	0	0	0	0	0	0	0	0	0	0	0	0	0	0	0	0	0.0846406
UNCID_458787.TCGA-AA-A022-01A-21R-A16W-07.110823_UNC2-RDR300275_00083_FC_631M4AAXX.2.trimmed.annotated.translated_to_genomic.exon.quantification.txt	0	0	0	0	0	0	0	0	0	0	0	0.0997836	0.0804816	0	0	0	0	0
UNCID_278142.TCGA-AA-3818-01A-01R-0905-07.100908_UNC7-RDR3001641_00027_FC_62ER1AAXX.7.trimmed.annotated.translated_to_genomic.exon.quantification.txt	0	0	0	0	0	0	0	0	0	0	0	0	0.0227973	0.227245	0	0	0	0
UNCID_279111.TCGA-AA-3858-01A-01R-0905-07.100902_UNC7-RDR3001641_00025_FC_62EPOAAXX.8.trimmed.annotated.translated_to_genomic.exon.quantification.txt	0	0.0682446	0.419908	0.341722	0	0.236696	0	0	0	0	0	0.0573296	0.16663	0	0	0	0	0.102742
UNCID_278446.TCGA-AA-3860-01A-02R-0905-07.100908_UNC6-RDR300211_00030_FC_62EL4AAXX.1.trimmed.annotated.translated_to_genomic.exon.quantification.txt	0	0	0	0	0	0	0	0.176978	0.0602073	0	0.468415	0	0	0	0	0	0	0
UNCID_458048.TCGA-AA-A01T-01A-21R-A16W-07.110823_UNC2-RDR300275_00083_FC_631M4AAXX.1.trimmed.annotated.translated_to_genomic.exon.quantification.txt	0	0	0	0	0	0	0	0	0	0	0	0	0	0	0	0	0	0
UNCID_282024.TCGA-AA-3562-01A-02R-0821-07.100813_UNC5-RDR300700_00020_FC_62A20AAXX.2.trimmed.annotated.translated_to_genomic.exon.quantification.txt	0	0	0	0.391141	0.0765277	0	0	0	0	0	0	0	0.176945	0	0	0	0	0
UNCID_412753.TCGA-AA-3509-01A-01R-1410-07.110302_UNC6-RDR300211_00066_FC_62J5EAAXX.4.trimmed.annotated.translated_to_genomic.exon.quantification.txt	0	0	0	0	0	0	0	0	0	0	0	0	0	0	0	0	0	0
UNCID_288919.TCGA-AA-3877-01A-01R-1022-07.100630_UNC1-RDR301647_0010_622MUAAXX.8.trimmed.annotated.translated_to_genomic.exon.quantification.txt	0	0	0	0	0	0	0	0.25485	0	0	0	0	0.12849	0	0	0	0	0
UNCID_290884.TCGA-AA-A01Q-01A-01R-A002-07.100608_UNC3-RDR300156_0008.8.trimmed.annotated.translated_to_genomic.exon.quantification.txt	0	0	0	0	0	0	0	0	0	0	0	0	0	0	0	0	0	0.0998972
UNCID_282315.TCGA-AA-3984-01A-02R-1022-07.100813_UNC4-RDR3001561_00015_FC_629FHAAXX.6.trimmed.annotated.translated_to_genomic.exon.quantification.txt	0	0	0	0	0	0	0	0	0	0	0	0	0	0	0	0	0	0
UNCID_287031.TCGA-AA-3973-01A-01R-1022-07.100723_UNC2-RDR300275_0016_62330AAXX.6.trimmed.annotated.translated_to_genomic.exon.quantification.txt	0	0	0	0	0	0	0	0.0998276	0.0731845	0	0	0	0	0	0	0	0	0
UNCID_291393.TCGA-AA-A00Q-01A-01R-A002-07.100607_UNC1-RDR301647_0006.5.trimmed.annotated.translated_to_genomic.exon.quantification.txt	0	0	0	0	0	0.014783	0.231939	0	0	0	0	0	0	0	0	0	0	0
UNCID_288170.TCGA-A6-3810-01A-01R-1022-07.100708_UNC8-RDR3001640_0010_62333AAXX.3.trimmed.annotated.translated_to_genomic.exon.quantification.txt	0.241894	0	0	0	0	0	0	0	0	0	0	0	0	0	0	0	0	0
UNCID_286657.TCGA-AA-3521-01A-01R-0821-07.100730_UNC2-RDR300275_00017_FC_629JTAAXX.4.trimmed.annotated.translated_to_genomic.exon.quantification.txt	0	0	0	0	0.329445	0.389506	0	0	0	0	0	0	0	0	0	0	0	0
UNCID_188753.TCGA-CM-5341-01A-01R-1410-07.110324_UNC6-RDR300211_00088_FC_7090HAAXX.8.trimmed.annotated.translated_to_genomic.exon.quantification.txt	0	0	0.294259	0.141471	0	0	0	0	0	0	0	0	0	0	0	0	0	0.0886135
UNCID_283602.TCGA-AA-3837-01A-01R-0905-07.100810_UNC2-RDR300275_00019_FC_629FEAAXX.6.trimmed.annotated.translated_to_genomic.exon.quantification.txt	0	0	0	0	0	0	0	0	0	0	0	0	0	0	0	0	0	0
UNCID_282026.TCGA-AA-3549-01A-02R-0821-07.100813_UNC5-RDR300700_00020_FC_62A20AAXX.1.trimmed.annotated.translated_to_genomic.exon.quantification.txt	0	0	0	0	0.12384	0.162245	0	0	0.115083	0	0	0	0	0	0	0	0	0
UNCID_282580.TCGA-AA-3561-01A-01R-0821-07.100813_UNC3-RDR300156_00019_FC_629UPAAXX.6.trimmed.annotated.translated_to_genomic.exon.quantification.txt	0	0	0	0	0	0	0	0	0	0	0	0	0	0	0	0	0	0
UNCID_278114.TCGA-AA-A017-01A-01R-A00A-07.100908_UNC7-RDR3001641_00027_FC_62ER1AAXX.1.trimmed.annotated.translated_to_genomic.exon.quantification.txt	0	0	0.403211	0.0494131	0	0	0	0	0	0	0	0	0	0	0	0	0	0
UNCID_288946.TCGA-A6-3807-01A-01R-1022-07.100630_UNC1-RDR301647_0010_622MUAAXX.2.trimmed.annotated.translated_to_genomic.exon.quantification.txt	0	0	0	0	0	0	0	0	0	0	0	0	0	0	0	0	0	0
UNCID_284310.TCGA-AA-3989-01A-01R-1022-07.100809_UNC1-RDR301647_00017_FC_629F8AAXX.8.trimmed.annotated.translated_to_genomic.exon.quantification.txt	0	0	0	0	0	0	0	0	0	0	0	0	0	0	0	0	0	0
UNCID_283307.TCGA-AA-3812-01A-01R-0905-07.100810_UNC6-RDR300211_00022_FC_629L9AAXX.6.trimmed.annotated.translated_to_genomic.exon.quantification.txt	0	0.223464	0	0	0	0.254952	1.00283	0.374456	1.0308	0.335687	0.75607	0.117327	0	0	0	0	0	0.168212
UNCID_278066.TCGA-AA-3852-01A-01R-0905-07.100908_UNC7-RDR3001641_00027_FC_62ER1AAXX.4.trimmed.annotated.translated_to_genomic.exon.quantification.txt	0	0	0	0	0	0	0	0	0	0.24623	0.53723	0	0	0	0	0	0	0
UNCID_282909.TCGA-A6-2677-01A-01R-0821-07.100811_UNC7-RDR3001641_00019_FC_629GAAAXX.7.trimmed.annotated.translated_to_genomic.exon.quantification.txt	0	0	0	0	0.345161	0.031104	0.200913	0	0.193471	0	0	0	0	0	0	0	0	0
UNCID_297639.TCGA-AZ-4681-01A-01R-1410-07.110324_UNC6-RDR300211_00088_FC_7090HAAXX.4.trimmed.annotated.translated_to_genomic.exon.quantification.txt	0	0	0	0	0	0	0	0.314492	0.00959764	0	0	0	0	0	0	0	0	0
UNCID_287839.TCGA-AA-3939-01A-01R-1022-07.100709_UNC1-RDR301647_0011_6236JAAXX.2.trimmed.annotated.translated_to_genomic.exon.quantification.txt	0	0	0	0	0	0	0	0	0	0	0	0	0	0	0	0	0	0
UNCID_278492.TCGA-AA-3966-01A-01R-1113-07.100908_UNC6-RDR300211_00030_FC_62EL4AAXX.3.trimmed.annotated.translated_to_genomic.exon.quantification.txt	0	0.113819	0	0	0	0	0	0	0	0	0	0.0637435	0.130269	0	0	0	0	0
UNCID_287494.TCGA-AA-3869-01A-01R-1022-07.100715_UNC1-RDR301647_0012_62338AAXX.7.trimmed.annotated.translated_to_genomic.exon.quantification.txt	0	0.247022	0.985573	0.383443	0	0	0.208632	0.0282225	0	0	0	0	0.120157	0	0	0	0	0
UNCID_287783.TCGA-AA-3970-01A-01R-1022-07.100709_UNC1-RDR301647_0011_6236JAAXX.5.trimmed.annotated.translated_to_genomic.exon.quantification.txt	0	0	0	0	0	0	0	0	0	0	0	0.36213	0.44545	0	0	0	0	0
TotalRNASeqV2
exon	2	3	4	5	6	7	8	9	10	11	12	13	14	15	16	17	18	19
unc.edu.d517fd04-2868-4d22-a0d6-cfe81e885601.2316794.bt.exon_quantification.txt	0	0.0770975	0.422494	0	0	0	0	0	0.10669	0	0	0.102547	0.111771	0.725658	0	0.0487868	0.26572	0.0580349
unc.edu.5b7d536d-3683-401e-af82-2abf33195181.2316804.bt.exon_quantification.txt	0	0.118479	0	0	0	0	0	0	0	0	0	0	0	0	0	0	0	0
unc.edu.2afe2e25-2cd9-4bdf-a21a-48d4fb1d2b53.2317175.bt.exon_quantification.txt	0	0	0	0	0	0	0	0	0	0	0	0	0	0	0	0.992075	0	1.7702
unc.edu.fa89193c-5cdd-4092-931e-867270bef743.2316990.bt.exon_quantification.txt	0	0.095692	0	0	0	0.24892	0.0458385	0	0.176563	0	0.100845	0	0	0.0500374	0.0378896	0.0302767	0.206129	0
unc.edu.83fa4a82-ee27-4c93-a685-b72c8b90a9d1.2316980.bt.exon_quantification.txt	0	0	0.137361	0.143084	0	0.0652029	0.0720423	0	0	0.429252	0	0	0.327049	0	0.178648	0.0951691	0	0
unc.edu.ef85707b-a094-4d15-b932-be6801df1a76.2316766.bt.exon_quantification.txt	0	0	0	0	0	0	0	0	0	0	0	0	0	0	0	0	0	0
unc.edu.8d4e4845-5522-4a77-ae50-8a4888219b14.2317187.bt.exon_quantification.txt	0	0	0	0	0.306198	0.267439	1.03422	0.148786	0.0711369	0.880319	0.650082	0.410246	0.670719	0	0	0.195175	0	0.116086
unc.edu.97e6f1c1-f080-4b0d-b53e-17282379ec92.2316964.bt.exon_quantification.txt	0	0	0	0	0.127292	0.0555895	0	0	0.0591457	0	0	0	0	0	0	0	0	0
unc.edu.96312391-1348-4344-8005-40350f6074f4.2317182.bt.exon_quantification.txt	0.224606	0.0602501	0	0	0	0	0.692666	0.465029	0.111169	0	0	0.160277	0.611427	0	0.095425	0.0762519	0	0
unc.edu.40d7a5eb-3372-4665-b3fd-005cadab9139.2317186.bt.exon_quantification.txt	0	0.202948	0	0	0	0.175974	0.583298	0.587406	0.748926	0	0	0	0	0	0	0.128424	0	2.21514
unc.edu.fa83e8b5-f08b-4453-987e-b7e0d0b3dd65.2317202.bt.exon_quantification.txt	0	0.0662057	0	0.251949	0.788711	0.459249	0.126856	0.127749	0.549708	0	0.837247	0.35224	0.0959807	0	0	0.125684	0	0.299017
unc.edu.d2a9d239-ad6c-40bd-92ea-c05f0b6db305.2316778.bt.exon_quantification.txt	0	0	0	0	0	0	0	0	0	0	0	0	0	0.131743	0	0.0398577	0	0.0237066
unc.edu.4195c5cf-6750-4266-86ff-9942914962b1.2316971.bt.exon_quantification.txt	0	0	0	0	0	0	0	0	0	0	0	0	0	0	0	0.134476	0	0
unc.edu.9692c7d3-3098-46ba-92ee-e72692f3adba.2317180.bt.exon_quantification.txt	0	0	0	0	0	0	0	0	0	0	0	0	0.33223	0	0	0	0	0.345008
unc.edu.72da97cd-7b0c-414c-82ee-ae82091af5b3.2316969.bt.exon_quantification.txt	0	0	0	0	0	0.0985289	0.217728	0	0.209664	0	0	0	0.082368	0	0.0899859	0.0359528	0	0
unc.edu.c33f729e-5b49-4bc4-b315-262271999e8e.2316808.bt.exon_quantification.txt	0	0	0	0	0	0	0	0	0.0511464	0	0	0	0	0	0	0	0	0
unc.edu.7a413cfc-1506-4c24-883d-bd6098812b9b.2316767.bt.exon_quantification.txt	0	0	0	0	0	0	0.846222	0.284061	0	0	0	0	0	0	0	0	0	0
unc.edu.7e2e250b-e5c7-466d-aecb-e1b12cb04ca5.2316806.bt.exon_quantification.txt	0	0	0	0	0.481071	0	0.619	0	0	0	3.57472	2.25589	0.409801	0	0	0.511068	0	0.0607946
unc.edu.9207eba7-e42f-4663-b1af-250971977c83.2316793.bt.exon_quantification.txt	0	0	0	0	0	0	0	0	0	0	0	0.0887783	0	0.0698028	0.0528565	0.0211182	0	0
unc.edu.d339980f-bcc9-4e22-8059-75a74e690744.2316802.bt.exon_quantification.txt	0	0	0.136224	0	0	0	0.214339	0	0.0688	0	0.157182	0	0	0	0	0	3.02006	2.75068
